# Supplementary material for: Maize RNA PolIV affects the expression of genes with nearby TE insertions and has a genome-wide repressive impact on transcription
Source: BMC Plant Biol. 2017 Oct 12;17:161. doi: 10.1186/s12870-017-1108-1 (PMC5639751; doi:10.1186/s12870-017-1108-1)
Supplement: Supplementary file 19 — rpd1/rmr6 differentially expressed genes (log2FC > |1|, FDR < 0.05) obtained with Cuffdiff, starting from all the sequenced samples, subdivided into bins based on their fold change variation. (XLSX 357 kb) [file 12870_2017_1108_MOESM19_ESM.xlsx]

## Sheet: DataS2
test_id	locus	FPKM_B73	FPKM_rmr6	log2(fold_change)	log2(fold_change)	test_stat	p_value	q_value	significant	ExpressionBIN
XLOC_038652	3:12935068-12935201	0	2797.67	inf	18.0939	#NAME?	5e-05	0.00060523	yes	3
XLOC_008157	1:296163518-296163594	0	2219.25	inf	17.7597	#NAME?	5e-05	0.00060523	yes	3
XLOC_000025	1:314890-314954	0	484.019	inf	15.5628	#NAME?	5e-05	0.00060523	yes	3
XLOC_039655	3:52953636-52953714	0	475.192	inf	15.5363	#NAME?	5e-05	0.00060523	yes	3
XLOC_054167	4:171279086-171279194	0	457.025	inf	15.48	#NAME?	5e-05	0.00060523	yes	3
XLOC_097741	8:167615055-167615151	0	386.991	inf	15.24	#NAME?	5e-05	0.00060523	yes	3
XLOC_043499	3:217287132-217287257	0	358.817	inf	15.131	#NAME?	5e-05	0.00060523	yes	3
XLOC_080091	6:17650462-17650557	0	337.221	inf	15.0414	#NAME?	5e-05	0.00060523	yes	3
XLOC_073307	5:177428479-177428552	0	316.168	inf	14.9484	#NAME?	5e-05	0.00060523	yes	3
XLOC_070966	5:67528030-67528112	0	278.153	inf	14.7636	#NAME?	5e-05	0.00060523	yes	3
XLOC_107181	9:152777391-152777494	0	261.919	inf	14.6769	#NAME?	5e-05	0.00060523	yes	3
XLOC_006210	1:238475664-238475743	0	257.006	inf	14.6496	#NAME?	5e-05	0.00060523	yes	3
XLOC_017809	10:52108817-52108893	0	235.073	inf	14.5209	#NAME?	5e-05	0.00060523	yes	3
XLOC_095227	8:89524716-89524801	0	228.926	inf	14.4827	#NAME?	5e-05	0.00060523	yes	3
GRMZM2G082627_O_1	2:214846198-214901771	0	215.241	inf	14.3937	#NAME?	0.006	0.0329911	yes	3
XLOC_036246	2:188464385-188464477	0	210.801	inf	14.3637	#NAME?	5e-05	0.00060523	yes	3
XLOC_097236	8:157386216-157386296	0	203.583	inf	14.3134	#NAME?	5e-05	0.00060523	yes	3
XLOC_078658	6:148337883-148337979	0	191.698	inf	14.2266	#NAME?	5e-05	0.00060523	yes	3
XLOC_012235	1:157066406-157066503	0	188.274	inf	14.2006	#NAME?	5e-05	0.00060523	yes	3
XLOC_102492	8:165949427-165949506	0	178.037	inf	14.12	#NAME?	5e-05	0.00060523	yes	3
XLOC_005787	1:225453255-225453343	0	154.164	inf	13.9123	#NAME?	5e-05	0.00060523	yes	3
XLOC_022599	10:90218304-90218392	0	141.917	inf	13.7929	#NAME?	5e-05	0.00060523	yes	3
XLOC_005786	1:225451769-225451892	0	135.115	inf	13.722	#NAME?	5e-05	0.00060523	yes	3
XLOC_108376	9:30231356-30231447	0	123.235	inf	13.5892	#NAME?	5e-05	0.00060523	yes	3
GRMZM2G076031_X_1	2:179815057-179815785	0	119.346	inf	13.543	#NAME?	5e-05	0.00060523	yes	3
XLOC_010083	1:55815721-55815820	0	116.831	inf	13.5123	#NAME?	5e-05	0.00060523	yes	3
XLOC_070963	5:67520266-67520361	0	116.357	inf	13.5064	#NAME?	5e-05	0.00060523	yes	3
XLOC_070962	5:67518572-67518655	0	105.267	inf	13.3619	#NAME?	5e-05	0.00060523	yes	3
GRMZM2G527064	2:78955477-78955556	0	104.465	inf	13.3509	#NAME?	5e-05	0.00060523	yes	3
XLOC_065675	5:100061972-100062083	0	103.944	inf	13.3437	#NAME?	5e-05	0.00060523	yes	3
XLOC_063112	5:4631490-4631609	0	97.815	inf	13.256	#NAME?	5e-05	0.00060523	yes	3
XLOC_098196	8:3504276-3504528	0	93.4609	inf	13.1903	#NAME?	5e-05	0.00060523	yes	3
GRMZM2G559161	5:26607303-26607390	0	93.4088	inf	13.1895	#NAME?	5e-05	0.00060523	yes	3
XLOC_106540	9:136128720-136128861	0	81.6425	inf	12.9953	#NAME?	5e-05	0.00060523	yes	3
XLOC_005501	1:215387533-215387656	0	81.5716	inf	12.994	#NAME?	5e-05	0.00060523	yes	3
GRMZM2G144701_X_1	8:155520013-155522670	0	80.3645	inf	12.9725	#NAME?	0.0012	0.00921509	yes	3
XLOC_072142	5:130855849-130855944	0	78.8654	inf	12.9454	#NAME?	5e-05	0.00060523	yes	3
GRMZM2G458423_X_1	1:2159240-2166541	0	75.2773	inf	12.8782	#NAME?	0.00305	0.019367	yes	3
XLOC_090057	7:54904144-54904247	0	73.7199	inf	12.848	#NAME?	5e-05	0.00060523	yes	3
GRMZM2G489785	3:103699229-103699320	0	65.2512	inf	12.672	#NAME?	5e-05	0.00060523	yes	3
XLOC_075719	6:39871949-39872038	0	54.965	inf	12.4246	#NAME?	5e-05	0.00060523	yes	3
GRMZM2G545766	4:42341276-42341459	0	54.6259	inf	12.4156	#NAME?	5e-05	0.00060523	yes	3
XLOC_004325	1:175539220-175539328	0	53.3632	inf	12.3819	#NAME?	5e-05	0.00060523	yes	3
XLOC_035166	2:145886023-145886133	0	50.7818	inf	12.3104	#NAME?	5e-05	0.00060523	yes	3
GRMZM2G507885	6:78985498-78985597	0	50.5441	inf	12.3036	#NAME?	5e-05	0.00060523	yes	3
XLOC_007898	1:289575701-289575790	0	50.3337	inf	12.2976	#NAME?	5e-05	0.00060523	yes	3
GRMZM2G572949	4:180930038-180931104	0	50.1388	inf	12.292	#NAME?	5e-05	0.00060523	yes	3
XLOC_025177	2:13891985-13892181	0	48.51	inf	12.2444	#NAME?	5e-05	0.00060523	yes	3
GRMZM2G476515_X_1	4:138517172-138520806	0	45.4465	inf	12.1503	#NAME?	5e-05	0.00060523	yes	3
XLOC_090166	7:63548344-63548490	0	44.7556	inf	12.1282	#NAME?	5e-05	0.00060523	yes	3
XLOC_097730	8:167520799-167520917	0.421281	1929.76	12.1613	12.1275	8.71005	5e-05	0.00060523	yes	3
GRMZM2G494504	7:11585203-11585336	0	43.8766	inf	12.0996	#NAME?	5e-05	0.00060523	yes	3
XLOC_005790	1:225463166-225463284	0	43.8645	inf	12.0992	#NAME?	5e-05	0.00060523	yes	3
XLOC_110288	9:114532774-114532867	0	42.5166	inf	12.0541	#NAME?	5e-05	0.00060523	yes	3
XLOC_003693	1:145329091-145329251	0	38.1471	inf	11.8977	#NAME?	5e-05	0.00060523	yes	3
GRMZM2G485269	4:156577176-156577265	0	36.738	inf	11.8435	#NAME?	5e-05	0.00060523	yes	3
GRMZM2G500814	4:155563943-155564040	0	35.1667	inf	11.7804	#NAME?	5e-05	0.00060523	yes	3
GRMZM2G494294	9:79300781-79300888	0	33.5082	inf	11.7107	#NAME?	5e-05	0.00060523	yes	3
XLOC_042817	3:195897657-195897780	0	33.3466	inf	11.7038	#NAME?	5e-05	0.00060523	yes	3
XLOC_073811	5:191941111-191941230	0	31.6188	inf	11.627	#NAME?	5e-05	0.00060523	yes	3
XLOC_047686	3:162147041-162147165	0	31.1125	inf	11.6037	#NAME?	5e-05	0.00060523	yes	3
XLOC_096333	8:129761969-129762818	0	29.2341	inf	11.5139	#NAME?	5e-05	0.00060523	yes	3
XLOC_048272	3:183153742-183153888	0	28.5149	inf	11.478	#NAME?	5e-05	0.00060523	yes	3
XLOC_070961	5:67517757-67517921	0	28.4169	inf	11.473	#NAME?	5e-05	0.00060523	yes	3
XLOC_004329	1:175554357-175554506	0	27.7643	inf	11.4395	#NAME?	5e-05	0.00060523	yes	3
GRMZM2G578653	5:144891685-144892170	0	26.6009	inf	11.3778	#NAME?	0.0001	0.00113386	yes	3
GRMZM2G539681	1:278992054-278992155	0	25.4432	inf	11.3136	#NAME?	5e-05	0.00060523	yes	3
XLOC_074067	5:199691098-199691305	0	24.9352	inf	11.2845	#NAME?	5e-05	0.00060523	yes	3
XLOC_101642	8:144508715-144508870	0	24.9255	inf	11.284	#NAME?	5e-05	0.00060523	yes	3
GRMZM2G064805	2:203081509-203082016	0	24.8819	inf	11.2815	#NAME?	5e-05	0.00060523	yes	3
XLOC_086720	7:115715933-115716032	0	24.2896	inf	11.2467	#NAME?	5e-05	0.00060523	yes	3
XLOC_038003	2:233932326-233932488	0	23.8146	inf	11.2182	#NAME?	5e-05	0.00060523	yes	3
XLOC_035497	2:160807639-160807812	0	23.3604	inf	11.1905	#NAME?	5e-05	0.00060523	yes	3
XLOC_055218	4:202999408-202999539	0	22.8283	inf	11.1572	#NAME?	5e-05	0.00060523	yes	3
GRMZM2G583762	9:100680593-100680670	0	21.3979	inf	11.0639	#NAME?	0.00015	0.00161686	yes	3
GRMZM2G529020	6:134875647-134875758	0	21.2338	inf	11.0528	#NAME?	5e-05	0.00060523	yes	3
GRMZM5G857701_X_1	5:214998411-215000055	0	20.9658	inf	11.0345	#NAME?	0.0053	0.0300166	yes	3
XLOC_060458	4:169235583-169235716	0	20.428	inf	10.997	#NAME?	5e-05	0.00060523	yes	3
GRMZM2G546366	8:36213709-36213811	0	20.4018	inf	10.9952	#NAME?	5e-05	0.00060523	yes	3
GRMZM2G538741	3:191826904-191826999	0	20.297	inf	10.9878	#NAME?	5e-05	0.00060523	yes	3
XLOC_060815	4:180928961-180929084	0	19.3829	inf	10.9213	#NAME?	5e-05	0.00060523	yes	3
XLOC_051992	4:72077729-72077896	0	19.3717	inf	10.9205	#NAME?	5e-05	0.00060523	yes	3
XLOC_010082	1:55814832-55815051	0	19.3385	inf	10.918	#NAME?	5e-05	0.00060523	yes	3
GRMZM2G500820	1:173778316-173778423	0	19.0223	inf	10.8942	#NAME?	5e-05	0.00060523	yes	3
GRMZM2G556472	5:101341722-101341870	0	18.8335	inf	10.8799	#NAME?	5e-05	0.00060523	yes	3
XLOC_017397	10:25136851-25137053	0	18.6595	inf	10.8665	#NAME?	5e-05	0.00060523	yes	3
GRMZM2G554601	10:65665169-65665273	0	18.4856	inf	10.853	#NAME?	5e-05	0.00060523	yes	3
GRMZM2G530601	2:174581934-174582105	0	17.8662	inf	10.8038	#NAME?	5e-05	0.00060523	yes	3
GRMZM2G572949_X_1	4:180930038-180931104	0	17.7147	inf	10.7915	#NAME?	5e-05	0.00060523	yes	3
XLOC_091183	7:118139568-118142439	0	16.7002	inf	10.7065	#NAME?	5e-05	0.00060523	yes	3
XLOC_033757	2:70644765-70644919	0	16.4441	inf	10.6842	#NAME?	5e-05	0.00060523	yes	3
XLOC_093958	8:22850923-22851150	0	16.2902	inf	10.6707	#NAME?	5e-05	0.00060523	yes	3
XLOC_106398	9:132295589-132295743	0	15.8723	inf	10.6332	#NAME?	5e-05	0.00060523	yes	3
XLOC_052864	4:123810829-123811075	0	15.2584	inf	10.5763	#NAME?	5e-05	0.00060523	yes	3
GRMZM2G019095	2:72238672-72238855	0	14.9966	inf	10.5514	#NAME?	5e-05	0.00060523	yes	3
GRMZM2G354172	7:72534122-72534293	0	14.5776	inf	10.5105	#NAME?	5e-05	0.00060523	yes	3
GRMZM2G518233	5:8115636-8115748	0	14.0219	inf	10.4545	#NAME?	5e-05	0.00060523	yes	3
GRMZM2G047385	1:79341596-79341806	0	13.8627	inf	10.438	#NAME?	5e-05	0.00060523	yes	3
XLOC_014590	1:237653273-237653482	0	13.7184	inf	10.4229	#NAME?	5e-05	0.00060523	yes	3
XLOC_094212	8:33330590-33330760	0	13.5221	inf	10.4022	#NAME?	5e-05	0.00060523	yes	3
XLOC_023323	10:117740117-117740300	0	13.4951	inf	10.3993	#NAME?	5e-05	0.00060523	yes	3
XLOC_059937	4:153642775-153642951	0	13.431	inf	10.3924	#NAME?	5e-05	0.00060523	yes	3
XLOC_090879	7:104421534-104428527	0	12.8652	inf	10.3304	#NAME?	0.001	0.00792822	yes	3
GRMZM2G578653_X_1	5:144891685-144892170	0	12.7156	inf	10.3135	#NAME?	5e-05	0.00060523	yes	3
XLOC_014592	1:237655919-237656081	0	12.7032	inf	10.3121	#NAME?	5e-05	0.00060523	yes	3
XLOC_066470	5:144923187-144923414	0	12.677	inf	10.3091	#NAME?	5e-05	0.00060523	yes	3
XLOC_036686	2:201891942-201892174	0	12.5127	inf	10.2903	#NAME?	5e-05	0.00060523	yes	3
XLOC_093768	8:16874851-16875053	0	12.4654	inf	10.2849	#NAME?	5e-05	0.00060523	yes	3
GRMZM2G577591	3:214820704-214820836	0	12.0352	inf	10.2342	#NAME?	5e-05	0.00060523	yes	3
GRMZM2G545766_X_1	4:42341276-42341459	0	11.6877	inf	10.192	#NAME?	5e-05	0.00060523	yes	3
GRMZM2G524728	4:146537358-146537453	0	11.2963	inf	10.1429	#NAME?	0.00015	0.00161686	yes	3
GRMZM2G570044	1:41227603-41228190	0	11.2037	inf	10.131	#NAME?	5e-05	0.00060523	yes	3
GRMZM2G540058	6:141148504-141148610	0	11.1679	inf	10.1264	#NAME?	5e-05	0.00060523	yes	3
GRMZM2G521186	7:59885218-59885340	0	11.1492	inf	10.124	#NAME?	5e-05	0.00060523	yes	3
XLOC_011133	1:95434766-95435024	0	11.0869	inf	10.1159	#NAME?	5e-05	0.00060523	yes	3
GRMZM2G553970	6:156529274-156529571	0	10.7641	inf	10.0734	#NAME?	5e-05	0.00060523	yes	3
GRMZM2G504922	5:195976275-195976375	0	10.6547	inf	10.0586	#NAME?	5e-05	0.00060523	yes	3
GRMZM2G140694_X_1	5:201437665-201441763	5.48314e-07	10.6235	24.2077	10.0543	4.05187e-05	0.0097	0.0481164	yes	3
XLOC_035431	2:158212101-158212519	0	10.4832	inf	10.0352	#NAME?	5e-05	0.00060523	yes	3
GRMZM2G065641_X_1	9:97950918-97957787	0	10.4004	inf	10.0238	#NAME?	0.0014	0.0104436	yes	3
GRMZM2G526588	1:57313425-57313530	0	10.2139	inf	9.99773	#NAME?	0.0001	0.00113386	yes	3
XLOC_074651	5:213320981-213321130	0	9.91656	inf	9.95515	#NAME?	5e-05	0.00060523	yes	3
GRMZM2G487026	1:22734114-22734252	0	9.90676	inf	9.95373	#NAME?	5e-05	0.00060523	yes	3
XLOC_024526	10:145854429-145854589	0	9.70075	inf	9.92344	#NAME?	5e-05	0.00060523	yes	3
XLOC_067056	5:167616375-167616538	0	9.65297	inf	9.91632	#NAME?	5e-05	0.00060523	yes	3
AC218998.2_FG008	4:6058207-6058788	0	9.57822	inf	9.90512	#NAME?	5e-05	0.00060523	yes	3
GRMZM2G326489	2:13899373-13900287	0	9.55176	inf	9.90113	#NAME?	5e-05	0.00060523	yes	3
XLOC_021719	10:52375030-52375225	0	9.437	inf	9.88371	#NAME?	5e-05	0.00060523	yes	3
GRMZM2G571292	6:135719522-135719615	0	9.40034	inf	9.8781	#NAME?	0.00025	0.00252206	yes	3
GRMZM2G400655	2:109066396-109072574	0.0850488	89.3865	10.0375	9.87733	1.3886	5e-05	0.00060523	yes	3
XLOC_039112	3:28408610-28408782	0	9.23013	inf	9.85177	#NAME?	5e-05	0.00060523	yes	3
XLOC_109843	9:99122323-99122492	0	9.19261	inf	9.8459	#NAME?	5e-05	0.00060523	yes	3
GRMZM2G525807	10:145976825-145976928	0	9.15223	inf	9.83955	#NAME?	5e-05	0.00060523	yes	3
GRMZM2G518650	9:25882017-25882121	0	8.83222	inf	9.78826	#NAME?	5e-05	0.00060523	yes	3
XLOC_052925	4:126386424-126386603	0	8.77581	inf	9.77903	#NAME?	5e-05	0.00060523	yes	3
GRMZM2G549471	4:235237746-235237859	0	8.62183	inf	9.75352	#NAME?	5e-05	0.00060523	yes	3
XLOC_067356	5:177563126-177563289	0	8.34216	inf	9.70601	#NAME?	5e-05	0.00060523	yes	3
GRMZM2G039268	1:279039773-279039974	0	8.28389	inf	9.69591	#NAME?	5e-05	0.00060523	yes	3
XLOC_101231	8:130743297-130743698	0	7.8512	inf	9.61861	#NAME?	5e-05	0.00060523	yes	3
XLOC_064798	5:62527083-62527282	0	7.77148	inf	9.6039	#NAME?	5e-05	0.00060523	yes	3
XLOC_105586	9:103888053-103888227	0	7.75422	inf	9.6007	#NAME?	5e-05	0.00060523	yes	3
XLOC_050965	4:28358281-28358571	0	7.51715	inf	9.55596	#NAME?	5e-05	0.00060523	yes	3
GRMZM2G171539	5:173064554-173068586	0	7.32823	inf	9.51929	#NAME?	5e-05	0.00060523	yes	3
GRMZM2G583717	1:133208835-133208955	0	7.326	inf	9.51885	#NAME?	5e-05	0.00060523	yes	3
XLOC_109599	9:88297264-88297463	0	7.32283	inf	9.51823	#NAME?	5e-05	0.00060523	yes	3
XLOC_085523	7:46693619-46693856	0	7.08047	inf	9.46974	#NAME?	5e-05	0.00060523	yes	3
XLOC_027840	2:125256264-125256555	0	7.03364	inf	9.46018	#NAME?	5e-05	0.00060523	yes	3
XLOC_014591	1:237654926-237655148	0	6.91192	inf	9.43503	#NAME?	5e-05	0.00060523	yes	3
GRMZM2G578656	5:144890904-144891335	0	6.83089	inf	9.41804	#NAME?	5e-05	0.00060523	yes	3
XLOC_039771	3:58088823-58089685	0	6.80416	inf	9.41239	#NAME?	5e-05	0.00060523	yes	3
XLOC_090551	7:88022721-88022941	0	6.78621	inf	9.40859	#NAME?	5e-05	0.00060523	yes	3
XLOC_005460	1:213961709-213961927	0	6.76907	inf	9.40494	#NAME?	5e-05	0.00060523	yes	3
GRMZM2G457937	3:13133664-13136210	0	6.72971	inf	9.39654	#NAME?	5e-05	0.00060523	yes	3
GRMZM2G702478	4:75575158-75576004	0	6.64674	inf	9.37867	#NAME?	5e-05	0.00060523	yes	3
XLOC_110289	9:114535881-114536090	0	6.62056	inf	9.37299	#NAME?	5e-05	0.00060523	yes	3
XLOC_038180	3:645753-645999	0	6.51694	inf	9.35026	#NAME?	5e-05	0.00060523	yes	3
XLOC_065293	5:82105527-82105782	0	6.45215	inf	9.33587	#NAME?	5e-05	0.00060523	yes	3
XLOC_023858	10:133696827-133697711	0.00321335	8.19202	11.3159	9.27784	0.448202	5e-05	0.00060523	yes	3
GRMZM2G543064	6:95235865-95235981	0	6.17828	inf	9.27339	#NAME?	0.00015	0.00161686	yes	3
GRMZM2G163182	1:49361271-49361544	0	6.12944	inf	9.26196	#NAME?	5e-05	0.00060523	yes	3
GRMZM2G066313	3:12647042-12647965	0	5.91026	inf	9.20952	#NAME?	5e-05	0.00060523	yes	3
XLOC_101230	8:130714350-130714641	0.0253518	20.9021	9.68734	9.20834	1.12043	5e-05	0.00060523	yes	3
AC197599.3_FG004	8:151022547-151029602	0	5.80683	inf	9.18409	#NAME?	0.00565	0.0315123	yes	3
GRMZM2G476515	4:138517172-138520806	0	5.75136	inf	9.17027	#NAME?	5e-05	0.00060523	yes	3
GRMZM5G853340	9:89963353-89963512	0	5.70723	inf	9.15917	#NAME?	5e-05	0.00060523	yes	3
AC217052.2_FG009	2:210195358-210195657	0	5.64425	inf	9.14319	#NAME?	5e-05	0.00060523	yes	3
GRMZM5G886315_X_1	3:214818800-214820567	0	5.59124	inf	9.1296	#NAME?	0.0006	0.00522113	yes	3
GRMZM2G528584	3:202068757-202068889	0	5.50757	inf	9.10789	#NAME?	5e-05	0.00060523	yes	3
XLOC_056914	4:12071087-12071725	0	5.507	inf	9.10774	#NAME?	5e-05	0.00060523	yes	3
XLOC_036939	2:208881362-208881702	0	5.41208	inf	9.0827	#NAME?	5e-05	0.00060523	yes	3
XLOC_066274	5:136470188-136470517	0	5.28886	inf	9.04954	#NAME?	5e-05	0.00060523	yes	3
GRMZM2G364685	2:203091579-203092589	0	5.25721	inf	9.0409	#NAME?	5e-05	0.00060523	yes	3
XLOC_106404	9:132300218-132300424	0	5.20996	inf	9.02789	#NAME?	5e-05	0.00060523	yes	3
AC218999.2_FG001	2:75445652-75446284	0	5.06707	inf	8.98785	#NAME?	5e-05	0.00060523	yes	3
GRMZM2G416998	6:84725365-84725873	0	4.97345	inf	8.961	#NAME?	5e-05	0.00060523	yes	3
GRMZM2G581076	3:195820365-195820490	0	4.95144	inf	8.95462	#NAME?	5e-05	0.00060523	yes	3
XLOC_059934	4:153627058-153627329	0	4.90336	inf	8.94057	#NAME?	5e-05	0.00060523	yes	3
AC191255.2_FG003	8:142361742-142361991	0	4.90116	inf	8.93992	#NAME?	5e-05	0.00060523	yes	3
GRMZM2G531901	5:121963141-121963267	0	4.88469	inf	8.93507	#NAME?	5e-05	0.00060523	yes	3
AC199065.2_FG001	8:88827251-88827458	0	4.82586	inf	8.91763	#NAME?	5e-05	0.00060523	yes	3
XLOC_087626	7:146415062-146415326	0	4.79621	inf	8.90876	#NAME?	5e-05	0.00060523	yes	3
GRMZM5G891152	7:169197968-169198176	0	4.67025	inf	8.87044	#NAME?	5e-05	0.00060523	yes	3
XLOC_031389	2:237467142-237467319	0	4.6386	inf	8.86065	#NAME?	5e-05	0.00060523	yes	3
AC207885.3_FG006	2:168866661-168866850	0	4.58086	inf	8.84262	#NAME?	5e-05	0.00060523	yes	3
GRMZM2G006884	9:136836743-136843023	0	4.5531	inf	8.83387	#NAME?	5e-05	0.00060523	yes	3
XLOC_088106	7:159512949-159513109	0	4.46512	inf	8.80578	#NAME?	5e-05	0.00060523	yes	3
GRMZM2G060605	1:80522735-80522945	0	4.43022	inf	8.79449	#NAME?	5e-05	0.00060523	yes	3
Cluster_364	9:123478014-123478757	0.00430389	6.3275	10.5218	8.79136	0.538187	5e-05	0.00060523	yes	3
XLOC_019995	10:136955705-136964480	0	4.40762	inf	8.78713	#NAME?	0.00165	0.011869	yes	3
XLOC_069791	5:23006822-23007831	0	4.3753	inf	8.77653	#NAME?	5e-05	0.00060523	yes	3
XLOC_065288	5:82063048-82063258	0	4.37503	inf	8.77644	#NAME?	5e-05	0.00060523	yes	3
XLOC_051408	4:44143755-44144036	0	4.37347	inf	8.77593	#NAME?	5e-05	0.00060523	yes	3
GRMZM5G833100	7:74265492-74285785	0	4.3629	inf	8.77245	#NAME?	0.00115	0.00890855	yes	3
GRMZM2G379295	8:28695433-28696835	0	4.27459	inf	8.74301	#NAME?	5e-05	0.00060523	yes	3
XLOC_077409	6:108254473-108254742	0	4.26845	inf	8.74094	#NAME?	5e-05	0.00060523	yes	3
XLOC_012639	1:173778480-173778695	0	4.23329	inf	8.72904	#NAME?	5e-05	0.00060523	yes	3
Cluster_146	3:58004618-58005081	0	4.22975	inf	8.72784	#NAME?	5e-05	0.00060523	yes	3
XLOC_066729	5:154697965-154698279	0	4.07835	inf	8.67537	#NAME?	5e-05	0.00060523	yes	3
XLOC_102493	8:165951533-165951812	0	4.05364	inf	8.66663	#NAME?	5e-05	0.00060523	yes	3
GRMZM2G081428	4:143802944-143803124	0	4.00651	inf	8.6498	#NAME?	5e-05	0.00060523	yes	3
XLOC_001779	1:55165668-55165907	0	3.97723	inf	8.63924	#NAME?	5e-05	0.00060523	yes	3
GRMZM2G128963	9:138096305-138096524	0	3.96906	inf	8.63628	#NAME?	5e-05	0.00060523	yes	3
XLOC_077410	6:108255609-108255852	0	3.93932	inf	8.62546	#NAME?	5e-05	0.00060523	yes	3
XLOC_042866	3:197389669-197390366	0	3.90407	inf	8.61253	#NAME?	5e-05	0.00060523	yes	3
GRMZM2G421449	5:10699243-10699635	0	3.83753	inf	8.58779	#NAME?	5e-05	0.00060523	yes	3
XLOC_020370	10:145853649-145853988	0	3.7914	inf	8.57039	#NAME?	5e-05	0.00060523	yes	3
GRMZM2G446087	7:7808303-7808486	0	3.77932	inf	8.5658	#NAME?	5e-05	0.00060523	yes	3
XLOC_070965	5:67525308-67525531	0.0443993	20.5417	8.85381	8.56145	1.35101	5e-05	0.00060523	yes	3
XLOC_098576	8:14610574-14610726	0	3.76142	inf	8.55896	#NAME?	5e-05	0.00060523	yes	3
XLOC_044753	3:21853310-21853531	0	3.74805	inf	8.55384	#NAME?	5e-05	0.00060523	yes	3
GRMZM5G877552	4:189777082-189777654	0	3.73898	inf	8.55035	#NAME?	5e-05	0.00060523	yes	3
AC226199.2_FG002_X_1	5:144904010-144906436	0	3.7287	inf	8.54639	#NAME?	0.0093	0.0465359	yes	3
XLOC_026281	2:48722125-48722318	0	3.69079	inf	8.53169	#NAME?	5e-05	0.00060523	yes	3
GRMZM2G028419	1:222837258-222837409	0	3.61107	inf	8.50027	#NAME?	5e-05	0.00060523	yes	3
GRMZM2G508838	3:117922592-117936923	0	3.60593	inf	8.49822	#NAME?	5e-05	0.00060523	yes	3
XLOC_032509	2:24390265-24390540	0	3.54165	inf	8.47235	#NAME?	5e-05	0.00060523	yes	3
XLOC_072688	5:154091180-154091387	0	3.36479	inf	8.39865	#NAME?	5e-05	0.00060523	yes	3
XLOC_021467	10:35178522-35179335	0	3.34958	inf	8.39214	#NAME?	5e-05	0.00060523	yes	3
XLOC_036069	2:182566276-182566588	0	3.33575	inf	8.38619	#NAME?	5e-05	0.00060523	yes	3
XLOC_089629	7:29162461-29162765	0	3.33281	inf	8.38492	#NAME?	5e-05	0.00060523	yes	3
GRMZM2G497801	3:121751970-121752248	0	3.12524	inf	8.29243	#NAME?	5e-05	0.00060523	yes	3
XLOC_070359	5:43283056-43283265	0	3.11629	inf	8.28831	#NAME?	5e-05	0.00060523	yes	3
XLOC_066999	5:165787169-165787420	13.5735	4217.36	8.27941	8.27834	9.89178	5e-05	0.00060523	yes	3
AC201780.3_FG003	5:64564155-64564365	0	3.00248	inf	8.23481	#NAME?	5e-05	0.00060523	yes	3
XLOC_029954	2:203093276-203094253	0	2.99955	inf	8.2334	#NAME?	5e-05	0.00060523	yes	3
GRMZM5G865949	9:73702341-73702563	0	2.99741	inf	8.23238	#NAME?	5e-05	0.00060523	yes	3
Cluster_181	4:8075755-8077044	0	2.98089	inf	8.22443	#NAME?	5e-05	0.00060523	yes	3
AC218999.2_FG001_X_1	2:75445652-75446284	0	2.95169	inf	8.21028	#NAME?	5e-05	0.00060523	yes	3
GRMZM2G559098	1:296537065-296537254	0	2.94988	inf	8.20939	#NAME?	5e-05	0.00060523	yes	3
XLOC_014589	1:237649516-237649800	0	2.93576	inf	8.2025	#NAME?	5e-05	0.00060523	yes	3
AC207223.3_FG003	2:43628833-43629824	0	2.91574	inf	8.19266	#NAME?	0.0027	0.0175721	yes	3
GRMZM2G493136_O_1	4:10349736-10352386	0	2.88938	inf	8.1796	#NAME?	0.003	0.019115	yes	3
XLOC_007144	1:267944418-267944657	0	2.86729	inf	8.16857	#NAME?	5e-05	0.00060523	yes	3
GRMZM2G094286	1:247176780-247177292	0.0656129	21.6221	8.36431	8.16033	1.83045	5e-05	0.00060523	yes	3
XLOC_038181	3:646683-647052	0	2.84332	inf	8.1565	#NAME?	5e-05	0.00060523	yes	3
Cluster_175	3:206865156-206865557	0	2.77613	inf	8.12212	#NAME?	5e-05	0.00060523	yes	3
XLOC_003674	1:144486295-144486481	0.0868177	26.7575	8.26774	8.111	2.044	5e-05	0.00060523	yes	3
XLOC_059935	4:153628332-153628594	0	2.73132	inf	8.09873	#NAME?	5e-05	0.00060523	yes	3
XLOC_094884	8:72137598-72137766	0.155447	45.1108	8.1809	8.09128	3.2677	5e-05	0.00060523	yes	3
XLOC_073220	5:174269101-174269514	0	2.71581	inf	8.09054	#NAME?	5e-05	0.00060523	yes	3
GRMZM5G812246	6:149683489-149684444	0	2.70676	inf	8.08574	#NAME?	5e-05	0.00060523	yes	3
Cluster_238	5:67529018-67531889	0.0248474	9.39954	8.56335	8.07693	4.85233	5e-05	0.00060523	yes	3
XLOC_034498	2:111416880-111417153	0	2.57431	inf	8.01364	#NAME?	5e-05	0.00060523	yes	3
XLOC_026889	2:74477562-74477975	0.0158937	6.63349	8.70517	8.0032	0.896733	5e-05	0.00060523	yes	3
GRMZM2G058713	6:38390561-38390738	0	2.55193	inf	8.00109	#NAME?	5e-05	0.00060523	yes	3
XLOC_105587	9:103889553-103889849	0	2.54919	inf	7.99954	#NAME?	5e-05	0.00060523	yes	3
GRMZM2G146821	9:31657426-31657900	0	2.51946	inf	7.98269	#NAME?	5e-05	0.00060523	yes	3
AC206637.3_FG001	5:23007916-23008243	0.0395444	12.4548	8.29901	7.97492	1.61314	5e-05	0.00060523	yes	3
XLOC_099714	8:68487380-68487669	0	2.46732	inf	7.95264	#NAME?	5e-05	0.00060523	yes	3
GRMZM2G428740	9:87122755-87123960	0	2.44763	inf	7.94112	#NAME?	5e-05	0.00060523	yes	3
XLOC_000920	1:25730107-25732995	0.00280301	3.12408	10.1222	7.93542	0.60163	5e-05	0.00060523	yes	3
XLOC_091833	7:140184070-140184527	0	2.43374	inf	7.93295	#NAME?	5e-05	0.00060523	yes	3
XLOC_068861	5:77803-78056	0	2.41257	inf	7.92039	#NAME?	5e-05	0.00060523	yes	3
XLOC_021468	10:35179505-35180049	0	2.40183	inf	7.91398	#NAME?	5e-05	0.00060523	yes	3
AC197442.3_FG002	6:100854078-100854677	0	2.33072	inf	7.87081	#NAME?	5e-05	0.00060523	yes	3
XLOC_005785	1:225450588-225450686	0.961825	226.545	7.87981	7.86495	7.68171	5e-05	0.00060523	yes	3
GRMZM2G583870	1:213606632-213606833	0	2.30874	inf	7.8572	#NAME?	5e-05	0.00060523	yes	3
XLOC_001667	1:51163281-51163558	0	2.29821	inf	7.85063	#NAME?	5e-05	0.00060523	yes	3
XLOC_038422	3:6665038-6665244	0	2.26062	inf	7.82694	#NAME?	5e-05	0.00060523	yes	3
XLOC_019586	10:124845444-124845847	0	2.20001	inf	7.78791	#NAME?	5e-05	0.00060523	yes	3
XLOC_081445	6:87749086-87749308	0	2.19734	inf	7.78617	#NAME?	5e-05	0.00060523	yes	3
XLOC_054857	4:191699489-191699904	0	2.19611	inf	7.78536	#NAME?	5e-05	0.00060523	yes	3
GRMZM2G145783	9:126675988-126676317	0	2.12921	inf	7.74093	#NAME?	5e-05	0.00060523	yes	3
AC206400.3_FG003	5:65404197-65404419	0	2.10382	inf	7.72371	#NAME?	5e-05	0.00060523	yes	3
GRMZM2G136755	7:125579838-125580151	0	2.09675	inf	7.71888	#NAME?	5e-05	0.00060523	yes	3
AC206512.3_FG004	1:272264708-272264894	0	2.08711	inf	7.71226	#NAME?	5e-05	0.00060523	yes	3
XLOC_105860	9:114579395-114579636	0	2.07834	inf	7.70621	#NAME?	5e-05	0.00060523	yes	3
GRMZM2G352773	6:145358764-145359290	0	2.06124	inf	7.69435	#NAME?	5e-05	0.00060523	yes	3
GRMZM2G141252	6:165406250-165407347	0.0172676	5.56166	8.3313	7.67478	1.19978	5e-05	0.00060523	yes	3
GRMZM2G074648	8:121954293-121955673	0	1.99594	inf	7.64813	#NAME?	5e-05	0.00060523	yes	3
XLOC_104775	9:67112504-67112747	0	1.95693	inf	7.6198	#NAME?	5e-05	0.00060523	yes	3
GRMZM2G491944	2:31172155-31172425	0	1.9554	inf	7.61868	#NAME?	5e-05	0.00060523	yes	3
GRMZM5G869124_O_1	1:40199369-40204974	2.12691e-05	1.94195	16.4784	7.60571	0.00239252	0.00225	0.0151796	yes	3
GRMZM2G050262	2:15134820-15135991	0	1.92496	inf	7.59616	#NAME?	5e-05	0.00060523	yes	3
AC184127.3_FG003	5:179839818-179840313	0	1.91962	inf	7.59217	#NAME?	5e-05	0.00060523	yes	3
Cluster_25	1:145335371-145336031	0.00339838	2.5506	9.55177	7.57828	0.347797	5e-05	0.00060523	yes	3
AC202878.3_FG002	4:66471750-66472089	0	1.89369	inf	7.57265	#NAME?	5e-05	0.00060523	yes	3
GRMZM2G569688	5:82082889-82083906	0	1.88283	inf	7.5644	#NAME?	5e-05	0.00060523	yes	3
Cluster_362	9:113833882-113834707	0	1.86196	inf	7.54841	#NAME?	5e-05	0.00060523	yes	3
GRMZM5G831204	8:154900366-154901228	0	1.81449	inf	7.51135	#NAME?	0.00405	0.0242775	yes	3
XLOC_031535	2:1924909-1982483	0.423477	77.9275	7.52371	7.49022	1.70156	0.00045	0.00410897	yes	3
GRMZM2G076031	2:179815057-179815785	0	1.77054	inf	7.47617	#NAME?	5e-05	0.00060523	yes	3
GRMZM2G008464	8:80199539-80203096	0	1.75987	inf	7.4675	#NAME?	5e-05	0.00060523	yes	3
GRMZM2G131001	3:8565821-8574703	0	1.75961	inf	7.46729	#NAME?	5e-05	0.00060523	yes	3
AC197164.4_FG002	5:59157457-59159967	0	1.75871	inf	7.46655	#NAME?	5e-05	0.00060523	yes	3
GRMZM2G584110_X_1	2:7852150-7852408	1.16951	205.567	7.45756	7.44535	1.97482	0.0043	0.0254543	yes	3
GRMZM2G041619	8:165486447-165489087	0.00281905	2.1973	9.60631	7.42785	1.07666	5e-05	0.00060523	yes	3
XLOC_020282	10:143949049-143949320	0.0586257	11.7628	7.64849	7.42249	1.86534	5e-05	0.00060523	yes	3
AC213398.3_FG008	3:138362800-138363265	0	1.70473	inf	7.42184	#NAME?	5e-05	0.00060523	yes	3
GRMZM2G064810	2:203091579-203092589	0	1.6796	inf	7.40054	#NAME?	5e-05	0.00060523	yes	3
XLOC_109841	9:99114822-99114947	0.159761	28.483	7.47804	7.39096	2.28269	5e-05	0.00060523	yes	3
GRMZM2G170593	8:86989883-86990736	0.0164874	4.42566	8.06838	7.3877	1.59355	5e-05	0.00060523	yes	3
Cluster_56	1:280904584-280907556	0.00334611	2.21202	9.36866	7.37931	1.45663	5e-05	0.00060523	yes	3
XLOC_107843	9:13924032-13924297	0	1.63337	inf	7.36051	#NAME?	5e-05	0.00060523	yes	3
GRMZM2G532084	9:17513609-17513829	0	1.62906	inf	7.35672	#NAME?	5e-05	0.00060523	yes	3
XLOC_026041	2:40838445-40838725	0	1.61762	inf	7.34662	#NAME?	5e-05	0.00060523	yes	3
GRMZM2G482546	2:48719260-48719469	0	1.60642	inf	7.33666	#NAME?	5e-05	0.00060523	yes	3
XLOC_045293	3:43930774-43931136	0	1.60634	inf	7.33659	#NAME?	5e-05	0.00060523	yes	3
GRMZM2G031315	1:254092752-254117898	0.0377903	7.69911	7.67053	7.3337	1.04963	5e-05	0.00060523	yes	3
XLOC_070964	5:67524388-67524671	0.0380231	7.70425	7.66264	7.32765	1.26771	5e-05	0.00060523	yes	3
XLOC_095427	8:97776967-97777104	0.292643	48.2784	7.36609	7.31792	4.08046	5e-05	0.00060523	yes	3
GRMZM2G031522_X_1	1:254092752-254117898	0.0361993	7.3357	7.66283	7.31289	1.18617	0.0008	0.00661365	yes	3
GRMZM2G484757	9:149549323-149549550	0	1.57946	inf	7.31239	#NAME?	5e-05	0.00060523	yes	3
GRMZM2G424169	5:187402855-187403064	0	1.57489	inf	7.30824	#NAME?	5e-05	0.00060523	yes	3
GRMZM2G105449	9:32915351-32917397	0	1.56813	inf	7.30207	#NAME?	5e-05	0.00060523	yes	3
XLOC_036064	2:182325735-182326004	0	1.56607	inf	7.30019	#NAME?	5e-05	0.00060523	yes	3
GRMZM2G116288	4:240619565-240621190	0.0867558	15.1498	7.44812	7.29169	2.31208	5e-05	0.00060523	yes	3
GRMZM2G512338	5:217047636-217047871	0	1.55483	inf	7.28986	#NAME?	5e-05	0.00060523	yes	3
GRMZM5G851493	2:48722996-48723444	0.0134896	3.64433	8.07766	7.28144	0.770293	5e-05	0.00060523	yes	3
AC191301.3_FG002	3:112923373-112923595	0	1.53668	inf	7.27303	#NAME?	5e-05	0.00060523	yes	3
GRMZM2G068169	1:258489885-258490503	0	1.52971	inf	7.26651	#NAME?	5e-05	0.00060523	yes	3
GRMZM2G114309	7:36457455-36457655	0	1.5291	inf	7.26594	#NAME?	5e-05	0.00060523	yes	3
XLOC_025760	2:31202571-31203001	0	1.51461	inf	7.2523	#NAME?	5e-05	0.00060523	yes	3
AC192381.3_FG004	1:285408819-285409221	0	1.5134	inf	7.25115	#NAME?	5e-05	0.00060523	yes	3
GRMZM2G050294	4:197919372-197927000	0.0181771	4.28147	7.87984	7.2508	0.486751	0.003	0.019115	yes	3
Cluster_11	1:55816328-55817520	0.00277637	1.91852	9.43258	7.23787	0.493517	5e-05	0.00060523	yes	3
GRMZM5G809663	1:106425068-106426667	0	1.49551	inf	7.23411	#NAME?	5e-05	0.00060523	yes	3
Cluster_97	2:72259449-72260391	0.00355951	2.03056	9.15599	7.23352	0.498675	5e-05	0.00060523	yes	3
GRMZM2G523549	10:63639092-63640862	0	1.46301	inf	7.20262	#NAME?	5e-05	0.00060523	yes	3
XLOC_009939	1:49910779-49911769	0	1.4269	inf	7.16682	#NAME?	5e-05	0.00060523	yes	3
GRMZM2G080438	9:130534035-130534434	0.0117642	3.10679	8.04488	7.16196	0.594208	5e-05	0.00060523	yes	3
GRMZM2G173379	1:252325378-252326711	0	1.41816	inf	7.15801	#NAME?	5e-05	0.00060523	yes	3
XLOC_044003	3:231527571-231527792	0	1.41774	inf	7.15759	#NAME?	5e-05	0.00060523	yes	3
GRMZM2G544775	9:6708251-6709039	0	1.38287	inf	7.12192	#NAME?	5e-05	0.00060523	yes	3
Cluster_366	9:132290412-132292183	0.00738429	2.39779	8.34303	7.11378	1.69717	5e-05	0.000601858	yes	3
GRMZM5G821869	5:23030120-23034478	0.0567215	9.14971	7.33369	7.10101	3.16682	0.00365	0.0223624	yes	3
GRMZM2G145427	1:246985746-246986159	0.026847	5.0031	7.54192	7.08801	1.30217	5e-05	0.00060523	yes	3
XLOC_101106	8:125925213-125925530	0	1.34242	inf	7.0794	#NAME?	5e-05	0.00060523	yes	3
Cluster_60	10:2643636-2644275	0.00765535	2.33519	8.25286	7.05346	0.671366	5e-05	0.00060523	yes	3
AC205376.4_FG005	4:79721092-79721326	0.0347386	5.92678	7.41456	7.05202	0.929944	5e-05	0.00060523	yes	3
AC191601.1_FG007	2:231078569-231084232	0	1.31559	inf	7.05049	#NAME?	0.00285	0.0183639	yes	3
GRMZM2G528190	2:179816118-179834678	0	1.30894	inf	7.04324	#NAME?	5e-05	0.00060523	yes	3
AC200256.3_FG007	1:235066458-235066740	0	1.30376	inf	7.03756	#NAME?	5e-05	0.00060523	yes	3
GRMZM5G803153_O_1	7:87543490-87544139	0	1.29708	inf	7.0302	#NAME?	5e-05	0.00060523	yes	3
XLOC_104774	9:67111479-67111914	0	1.28048	inf	7.01176	#NAME?	5e-05	0.00060523	yes	3
GRMZM2G071708	3:173184236-173184468	0	1.27747	inf	7.0084	#NAME?	5e-05	0.00060523	yes	3
XLOC_033086	2:42520541-42521201	0.0116001	2.75454	7.89153	6.99986	0.947194	5e-05	0.00060523	yes	3
GRMZM2G496579	8:5864932-5878549	0.0267219	4.68759	7.45468	6.99914	0.995462	5e-05	0.00060523	yes	3
GRMZM2G521213_O_1	2:203094350-203095336	0	1.26401	inf	6.99323	#NAME?	5e-05	0.00060523	yes	3
Cluster_15	1:90064460-90067713	0.00297381	1.63875	9.10607	6.98963	1.40861	5e-05	0.00060523	yes	3
GRMZM2G067842	4:191492082-191497075	0.0499694	7.59846	7.24852	6.98723	2.28737	5e-05	0.00060523	yes	3
GRMZM2G328619	1:53431570-53431841	0	1.24835	inf	6.97539	#NAME?	5e-05	0.00060523	yes	3
Cluster_346	9:15219860-15221390	0	1.2408	inf	6.96671	#NAME?	5e-05	0.00060523	yes	3
XLOC_070875	5:64558691-64559230	0	1.23961	inf	6.96533	#NAME?	5e-05	0.00060523	yes	3
GRMZM2G164715	1:239356156-239357801	0.00153902	1.42478	9.85451	6.95817	0.374502	5e-05	0.00060523	yes	3
XLOC_065289	5:82064270-82064708	0	1.23086	inf	6.9552	#NAME?	5e-05	0.00060523	yes	3
GRMZM2G584110	2:7852150-7852408	50.7436	6289.74	6.95363	6.95335	9.78366	5e-05	0.00060523	yes	3
GRMZM2G447806	9:10600311-10601406	0	1.22267	inf	6.94564	#NAME?	5e-05	0.00060523	yes	3
GRMZM2G033967	8:13040724-13040966	0.176328	22.8909	7.02037	6.94142	3.88889	5e-05	0.000601858	yes	3
GRMZM2G492768	2:90000686-90011517	0	1.21385	inf	6.93528	#NAME?	5e-05	0.00060523	yes	3
XLOC_091182	7:118139086-118139172	1.10396	136.299	6.94793	6.93504	9.52201	5e-05	0.00060523	yes	3
GRMZM2G032947	3:47035749-47036476	0.0756759	10.4448	7.10873	6.93106	3.41259	5e-05	0.00060523	yes	3
AC206274.3_FG006	6:148253352-148253598	0	1.18839	inf	6.90495	#NAME?	5e-05	0.00060523	yes	3
GRMZM2G145941	1:276594670-276598309	0.00890403	2.2491	7.98067	6.90091	0.928923	5e-05	0.00060523	yes	3
GRMZM2G098066	9:119545610-119547763	0.0110463	2.47962	7.81042	6.88622	1.705	5e-05	0.000601858	yes	3
GRMZM2G575328	2:7949651-7949877	6.77064	797.528	6.8801	6.87799	9.41821	5e-05	0.00060523	yes	3
XLOC_087455	7:141438247-141438342	3.11344	363.659	6.86794	6.86335	8.88702	5e-05	0.00060523	yes	3
GRMZM2G105564	4:42343210-42343518	0	1.14756	inf	6.85494	#NAME?	5e-05	0.00060523	yes	3
GRMZM5G878944	4:79717664-79720056	0.0186584	3.30058	7.46675	6.85198	1.46181	0.0004	0.00371968	yes	3
GRMZM2G452609	2:224588498-224588816	0	1.14104	inf	6.84679	#NAME?	5e-05	0.00060523	yes	3
XLOC_027534	2:108150809-108150986	0.128717	15.9279	6.9512	6.84417	2.32115	5e-05	0.00060523	yes	3
GRMZM2G025761	7:86496427-86497808	0	1.13868	inf	6.84383	#NAME?	5e-05	0.00060523	yes	3
XLOC_075778	6:43216904-43216990	1.37866	158.881	6.84854	6.8382	12.2291	5e-05	0.00060523	yes	3
Cluster_46	1:225455863-225456497	0	1.11747	inf	6.81695	#NAME?	5e-05	0.00060523	yes	3
GRMZM2G569575	1:253465093-253486946	0.0068397	1.88633	8.10743	6.8152	0.477421	5e-05	0.00060523	yes	3
GRMZM2G518751	9:101958034-101964781	0	1.1139	inf	6.81237	#NAME?	5e-05	0.00060523	yes	3
XLOC_065292	5:82084218-82084655	0.0563978	7.33342	7.0227	6.78917	1.35678	5e-05	0.00060523	yes	3
Cluster_337	8:150059110-150060097	0	1.09591	inf	6.78909	#NAME?	5e-05	0.00060523	yes	3
GRMZM2G500108	2:32869348-32869927	0	1.08707	inf	6.77751	#NAME?	5e-05	0.00060523	yes	3
XLOC_053485	4:151338434-151338817	0	1.08636	inf	6.77658	#NAME?	5e-05	0.00060523	yes	3
Cluster_209	4:157865796-157866492	0	1.05861	inf	6.73959	#NAME?	5e-05	0.00060523	yes	3
GRMZM5G890836	2:184791871-184794155	0.387023	42.4102	6.77585	6.73939	6.04897	0.00375	0.0228276	yes	3
GRMZM2G151208	2:224592418-224596284	0.00199733	1.26531	9.3072	6.73199	0.567624	5e-05	0.00060523	yes	3
GRMZM2G326339	5:162942534-162970402	0	1.05175	inf	6.7303	#NAME?	5e-05	0.00060523	yes	3
GRMZM2G045916	6:136565654-136566536	0	1.04405	inf	6.7198	#NAME?	5e-05	0.00060523	yes	3
XLOC_006109	1:235070569-235070944	0	1.03833	inf	6.71195	#NAME?	5e-05	0.00060523	yes	3
AC194712.3_FG001	4:151324798-151325396	0	1.03646	inf	6.70937	#NAME?	5e-05	0.00060523	yes	3
GRMZM2G347270	7:7345938-7351805	0.0370897	4.91371	7.04965	6.70819	1.72746	0.00065	0.00557143	yes	3
GRMZM2G108807	1:284287441-284288880	0.00569891	1.61859	8.14983	6.69682	0.634669	5e-05	0.00060523	yes	3
Cluster_48	1:237660478-237661696	0.0103135	2.0888	7.66199	6.69098	1.52618	5e-05	0.00060523	yes	3
XLOC_016040	1:283582441-283582842	0	1.01547	inf	6.68014	#NAME?	5e-05	0.00060523	yes	3
GRMZM2G173098	6:168806056-168806423	0	1.01534	inf	6.67996	#NAME?	5e-05	0.00060523	yes	3
GRMZM2G156105	4:108960368-108981642	0.00406389	1.42878	8.45771	6.67671	0.260383	0.005	0.0286937	yes	3
XLOC_027333	2:99184745-99184869	0.397089	41.5786	6.71024	6.6747	4.84367	5e-05	0.00060523	yes	3
XLOC_068310	5:206088258-206088436	0.115318	12.7506	6.7888	6.66996	2.10369	5e-05	0.00060523	yes	3
GRMZM2G088413	1:254478909-254482162	0.0802709	9.11238	6.82681	6.65901	4.71881	5e-05	0.00060523	yes	3
XLOC_020847	10:7162152-7162406	0.0269808	3.71324	7.1046	6.65364	0.751487	5e-05	0.00060523	yes	3
XLOC_070801	5:62193735-62193914	0.203651	21.4062	6.71578	6.6473	3.25268	5e-05	0.00060523	yes	3
XLOC_023976	10:136920923-136921329	0	0.989798	inf	6.64356	#NAME?	5e-05	0.00060523	yes	3
GRMZM2G410809	6:153670260-153670956	0	0.974138	inf	6.62079	#NAME?	5e-05	0.00060523	yes	3
Cluster_351	9:22412380-22413422	0	0.970395	inf	6.61529	#NAME?	5e-05	0.00060523	yes	3
GRMZM2G143332	1:284526790-284527201	0	0.958369	inf	6.59748	#NAME?	5e-05	0.00060523	yes	3
GRMZM2G395569	6:32898039-32901807	0	0.958153	inf	6.59716	#NAME?	5e-05	0.00060523	yes	3
AC213398.3_FG006	3:138332895-138333834	0	0.946913	inf	6.58032	#NAME?	5e-05	0.00060523	yes	3
AC213629.3_FG009	1:213961053-213961422	0	0.942515	inf	6.57367	#NAME?	5e-05	0.00060523	yes	3
Cluster_356	9:67130021-67131825	0	0.939649	inf	6.56932	#NAME?	5e-05	0.00060523	yes	3
GRMZM2G549354	10:92575300-92575620	0	0.92742	inf	6.55062	#NAME?	5e-05	0.00060523	yes	3
XLOC_096197	8:124796489-124796703	0.0923955	9.54397	6.69062	6.54388	1.96975	5e-05	0.00060523	yes	3
GRMZM2G102473	5:12223299-12223637	0	0.911544	inf	6.52598	#NAME?	5e-05	0.00060523	yes	3
XLOC_089783	7:38359121-38359578	0	0.907138	inf	6.51907	#NAME?	5e-05	0.00060523	yes	3
XLOC_078667	6:148434388-148434524	0.720603	66.4861	6.5277	6.50804	6.44158	5e-05	0.00060523	yes	3
GRMZM2G500739	9:116964356-116964693	0.0177771	2.51163	7.14246	6.50432	0.674994	5e-05	0.00060523	yes	3
GRMZM5G836069	5:36334372-36335324	0	0.895535	inf	6.5007	#NAME?	5e-05	0.00060523	yes	3
GRMZM2G115035	3:28664635-28666219	0.0195205	2.6613	7.091	6.49968	1.25941	5e-05	0.00060523	yes	3
XLOC_077137	6:100306791-100306982	0.106863	10.5529	6.62574	6.49804	2.00603	5e-05	0.00060523	yes	3
GRMZM2G563433	2:124572081-124572390	0	0.891689	inf	6.49456	#NAME?	5e-05	0.00060523	yes	3
AC196439.3_FG003	10:107244637-107245057	0	0.890725	inf	6.49301	#NAME?	5e-05	0.00060523	yes	3
GRMZM2G066358	9:8475071-8476735	0.0387708	4.37627	6.81859	6.49083	4.28638	0.0006	0.00522113	yes	3
GRMZM2G000260	9:63017687-63022884	0	0.888757	inf	6.48986	#NAME?	5e-05	0.00060523	yes	3
XLOC_034499	2:111418364-111418505	0.499566	45.7179	6.51594	6.48766	5.33463	5e-05	0.00060523	yes	3
GRMZM5G870900	10:69072885-69073812	0	0.88014	inf	6.47596	#NAME?	5e-05	0.00060523	yes	3
XLOC_016191	1:287802419-287802642	0.319144	28.7853	6.49498	6.45097	4.99417	0.00695	0.0368493	yes	3
Cluster_281	6:85196190-85196775	0.0170905	2.34883	7.1026	6.44414	1.1335	5e-05	0.00060523	yes	3
GRMZM2G703602	1:64437616-64438326	0	0.857094	inf	6.43812	#NAME?	5e-05	0.00060523	yes	3
GRMZM2G120159	2:208880063-208880824	0	0.852597	inf	6.43061	#NAME?	5e-05	0.00060523	yes	3
GRMZM2G351786	9:49275629-49320928	0.0110783	1.80235	7.346	6.42596	0.479531	5e-05	0.00060523	yes	3
GRMZM2G028749	6:42752777-42753183	0	0.849113	inf	6.42478	#NAME?	5e-05	0.00060523	yes	3
XLOC_006982	1:262352742-262353088	0.018332	2.41111	7.03919	6.41709	0.69556	5e-05	0.00060523	yes	3
AC184133.3_FG001	9:73617173-73619221	0	0.8444	inf	6.41684	#NAME?	5e-05	0.00060523	yes	3
GRMZM2G450376	4:96634421-96635893	0	0.824992	inf	6.38369	#NAME?	0.0031	0.0196044	yes	3
AC199638.4_FG005_O_1	3:43933710-43934319	0	0.824297	inf	6.38249	#NAME?	5e-05	0.00060523	yes	3
XLOC_111219	9:142281748-142282154	0.303154	26.0665	6.426	6.37973	4.46342	5e-05	0.00060523	yes	3
GRMZM2G410155_X_1	2:42260009-42269294	0	0.822458	inf	6.37931	#NAME?	0.0029	0.0186152	yes	3
GRMZM2G409083	3:141520875-141524948	0.0140662	1.99282	7.14643	6.37888	1.00436	0.0009	0.00729152	yes	3
GRMZM2G144870	2:140544819-140545299	0	0.819402	inf	6.374	#NAME?	5e-05	0.00060523	yes	3
AC205280.2_FG004	1:102239910-102240294	0	0.815553	inf	6.36729	#NAME?	5e-05	0.00060523	yes	3
XLOC_044937	3:28392352-28392461	2.26643	186.759	6.36461	6.35834	8.8022	5e-05	0.00060523	yes	3
Cluster_359	9:70659358-70660257	0	0.808284	inf	6.35453	#NAME?	5e-05	0.00060523	yes	3
XLOC_100101	8:87760129-87760402	0	0.807484	inf	6.35312	#NAME?	5e-05	0.00060523	yes	3
GRMZM2G502894	7:158794176-158794607	0	0.80331	inf	6.34573	#NAME?	5e-05	0.00060523	yes	3
Cluster_315	7:141430046-141431024	0.00783023	1.43401	7.51678	6.33961	0.907785	5e-05	0.00060523	yes	3
XLOC_035167	2:145929508-145929591	0.986747	80.5497	6.35106	6.33669	7.77557	5e-05	0.00060523	yes	3
AC195959.2_FG003	9:712856-713707	0.0523914	5.02629	6.58402	6.33487	2.11135	5e-05	0.000601858	yes	3
GRMZM2G014622	1:48639344-48640547	0	0.792812	inf	6.32699	#NAME?	5e-05	0.00060523	yes	3
ClusterV2_49	3:193134216-193136818	0.000913724	0.857458	9.87409	6.31258	0.376568	5e-05	0.00060523	yes	3
GRMZM2G135240	2:86507645-86509740	0.00818495	1.4316	7.45044	6.30878	0.90185	5e-05	0.00060523	yes	3
XLOC_063549	5:14659966-14660628	0.00744113	1.3422	7.49486	6.27667	0.587082	5e-05	0.00060523	yes	3
GRMZM2G083907	3:205652920-205663188	0	0.764318	inf	6.27485	#NAME?	5e-05	0.00060523	yes	3
GRMZM2G309145_X_1	9:142282196-142290199	0.629096	48.9603	6.28219	6.25973	4.39451	0.0071	0.0376036	yes	3
GRMZM2G178780	3:21130380-21130945	0	0.754991	inf	6.25737	#NAME?	5e-05	0.00060523	yes	3
GRMZM2G375597	1:261937806-261938856	0.00534932	1.1558	7.75533	6.247	0.447149	5e-05	0.00060523	yes	3
GRMZM2G544705	1:215388840-215388995	10.7454	816.867	6.24831	6.24699	9.58377	5e-05	0.00060523	yes	3
AC214634.3_FG003	1:158640371-158640699	0.0398554	3.77303	6.5648	6.24565	0.907985	5e-05	0.00060523	yes	3
GRMZM5G858249_O_1	5:14152068-14193684	0.00937971	1.45897	7.28119	6.24411	0.124498	0.0036	0.0221223	yes	3
AC200725.4_FG002	3:19705615-19705969	0.0118303	1.64256	7.11731	6.24223	0.467043	5e-05	0.00060523	yes	3
XLOC_091035	7:112263835-112263947	2.09518	158.968	6.24552	6.23874	8.13839	0.0039	0.023571	yes	3
GRMZM2G366101	2:186571925-186572201	0	0.744122	inf	6.23673	#NAME?	5e-05	0.00060523	yes	3
XLOC_026476	2:56257531-56257705	0.0900492	7.47484	6.37519	6.22519	1.52961	5e-05	0.00060523	yes	3
XLOC_032551	2:25495222-25495774	0.0286024	2.86312	6.64531	6.21778	1.21882	5e-05	0.00060523	yes	3
GRMZM2G701087	6:119355106-119355430	0	0.733908	inf	6.21705	#NAME?	5e-05	0.00060523	yes	3
GRMZM2G108699	4:173054729-173058978	0	0.727985	inf	6.20552	#NAME?	5e-05	0.00060523	yes	3
GRMZM2G360104	9:129529947-129530702	0	0.726642	inf	6.20289	#NAME?	5e-05	0.00060523	yes	3
GRMZM2G543164	9:144642829-144643599	2.2573	164.774	6.18975	6.18346	6.56099	5e-05	0.00060523	yes	3
GRMZM2G119740_X_1	7:162837623-162848341	0.11063	8.753	6.30596	6.18276	1.92669	0.0012	0.00921509	yes	3
GRMZM2G533716	4:52591124-52591482	0	0.715923	inf	6.18174	#NAME?	5e-05	0.00060523	yes	3
XLOC_067705	5:188811316-188811537	3.3001	238.681	6.17643	6.17213	5.31557	5e-05	0.00060523	yes	3
GRMZM2G423324_X_1	6:103109616-103110610	0.0187913	2.05666	6.77409	6.16552	0.852084	0.0074	0.0388485	yes	3
GRMZM2G118855	1:145329458-145330010	0.0125718	1.5955	6.98767	6.15236	0.599537	5e-05	0.00060523	yes	3
XLOC_063550	5:14661191-14661674	0	0.697911	inf	6.1455	#NAME?	5e-05	0.00060523	yes	3
GRMZM2G050674	6:21859878-21862004	0.00939731	1.35189	7.16851	6.13361	0.669291	5e-05	0.00060523	yes	3
GRMZM2G134818	1:254918115-254918543	0	0.69101	inf	6.13136	#NAME?	5e-05	0.00060523	yes	3
GRMZM5G834747	2:233768125-233771198	0	0.685725	inf	6.12045	#NAME?	5e-05	0.00060523	yes	3
GRMZM2G083682	9:25506917-25507539	0	0.685374	inf	6.11972	#NAME?	5e-05	0.00060523	yes	3
GRMZM2G461592	7:87541695-87543420	0.018121	1.94335	6.74474	6.11816	1.1215	5e-05	0.00060523	yes	3
XLOC_039113	3:28409785-28410123	0	0.682106	inf	6.11292	#NAME?	5e-05	0.00060523	yes	3
GRMZM2G053343	3:143385610-143389170	0.0352063	3.11242	6.46606	6.11	2.7699	5e-05	0.00060523	yes	3
AC197732.3_FG001	2:117234985-117235606	0	0.680065	inf	6.10866	#NAME?	5e-05	0.00060523	yes	3
Cluster_261	6:14717550-14732343	0.0153669	1.73639	6.82012	6.10528	0.416898	0.001	0.00792822	yes	3
XLOC_068901	5:1100866-1140180	0.0472236	3.90054	6.36802	6.09461	0.493974	0.00635	0.034496	yes	3
GRMZM2G063455	7:160364042-160364966	0	0.672589	inf	6.09295	#NAME?	5e-05	0.00060523	yes	3
XLOC_065059	5:72831219-72831569	0.0118269	1.46196	6.94969	6.07549	0.450938	5e-05	0.00060523	yes	3
GRMZM2G490920	3:21310451-21310846	0.0272055	2.4941	6.51848	6.07263	0.857307	5e-05	0.00060523	yes	3
GRMZM2G067553	2:147207093-147208068	0	0.662365	inf	6.07117	#NAME?	5e-05	0.00060523	yes	3
GRMZM5G817776	1:239266391-239269831	0	0.661201	inf	6.06867	#NAME?	5e-05	0.00060523	yes	3
XLOC_040274	3:90158713-90159243	0.456319	31.1371	6.09245	6.06164	4.96753	5e-05	0.00060523	yes	3
GRMZM2G394557	8:46891650-46892390	0	0.656189	inf	6.05786	#NAME?	5e-05	0.00060523	yes	3
GRMZM2G133514	8:56491007-56492060	0.00561825	1.02972	7.51792	6.05682	0.656816	5e-05	0.00060523	yes	3
GRMZM2G005700	7:175036098-175039061	0.00222718	0.802282	8.49275	6.05382	0.298716	5e-05	0.00060523	yes	3
GRMZM2G175009	10:55612815-55765958	0	0.653145	inf	6.05125	#NAME?	0.00865	0.0438935	yes	3
GRMZM2G005608	9:59390480-59391706	0	0.645829	inf	6.03525	#NAME?	5e-05	0.00060523	yes	3
GRMZM2G071971	4:217293300-217293651	0	0.639253	inf	6.02071	#NAME?	5e-05	0.00060523	yes	3
AC218964.2_FG003	9:148155718-148156216	0.0118048	1.40209	6.89206	6.01704	0.63195	5e-05	0.00060523	yes	3
GRMZM2G112122	4:153609846-153610780	0.0037315	0.872746	7.86966	6.00644	0.332244	5e-05	0.00060523	yes	3
GRMZM2G355342	3:180258792-180260824	0	0.627297	inf	5.99389	#NAME?	5e-05	0.00060523	yes	3
XLOC_070960	5:67516344-67516459	1.65176	105.533	5.99755	5.98898	7.11677	5e-05	0.00060523	yes	3
GRMZM5G800276	8:97772803-97773928	0.018974	1.81961	6.58346	5.98063	2.09179	0.00475	0.0274495	yes	3
GRMZM2G150804	2:227076815-227077661	0	0.620759	inf	5.97902	#NAME?	5e-05	0.00060523	yes	3
GRMZM2G331417	2:226491952-226492585	0.0367992	2.93388	6.31699	5.97509	1.03499	5e-05	0.00060523	yes	3
GRMZM2G457705	4:37967457-37968860	0	0.617411	inf	5.97134	#NAME?	5e-05	0.00060523	yes	3
Cluster_270	6:66328341-66329065	0.0261658	2.24514	6.42298	5.96245	1.7944	0.00015	0.00160088	yes	3
GRMZM5G849236	1:56598089-56598654	0.0676845	4.83274	6.15787	5.96205	2.15745	5e-05	0.00060523	yes	3
GRMZM2G153614	8:87905325-87906238	0	0.612972	inf	5.9611	#NAME?	5e-05	0.00060523	yes	3
GRMZM2G500737	9:116966325-116968124	0.00320712	0.811351	7.9829	5.95861	0.341587	5e-05	0.00060523	yes	3
GRMZM2G000692	2:193808261-193812323	0	0.604079	inf	5.94035	#NAME?	5e-05	0.00060523	yes	3
GRMZM2G127397	1:291786127-291787812	0	0.603822	inf	5.93975	#NAME?	5e-05	0.00060523	yes	3
GRMZM2G350436	8:174153123-174158443	0	0.600562	inf	5.93207	#NAME?	0.0031	0.0196044	yes	3
Cluster_249	5:135198188-135198982	0.00578588	0.943885	7.34993	5.91711	0.531775	5e-05	0.00060523	yes	3
XLOC_093600	8:11807001-11807215	0.0514127	3.69704	6.1681	5.91559	1.03784	5e-05	0.00060523	yes	3
GRMZM2G002815	5:2366008-2366655	0	0.59358	inf	5.91547	#NAME?	5e-05	0.00060523	yes	3
GRMZM2G144245	9:112826698-112840577	0	0.589333	inf	5.90529	#NAME?	0.00045	0.00410897	yes	3
Cluster_298	7:23264062-23268077	0.0768776	5.1747	6.07277	5.89913	5.95619	5e-05	0.00060523	yes	3
GRMZM2G149122	4:195036672-195041459	0	0.585089	inf	5.89503	#NAME?	5e-05	0.00060523	yes	3
GRMZM2G545782	10:110763650-110764131	0	0.571492	inf	5.86169	#NAME?	5e-05	0.00060523	yes	3
AC197699.3_FG004	9:16993460-16997348	0.0106529	1.15987	6.76658	5.82386	0.58625	5e-05	0.00060523	yes	3
GRMZM2G097020	8:24278778-24279329	0	0.553544	inf	5.81646	#NAME?	5e-05	0.00060523	yes	3
AC215879.3_FG010	2:233932503-233932749	0.0284752	2.15543	6.24213	5.81458	0.678501	5e-05	0.00060523	yes	3
Cluster_137	3:2693896-2695471	0.0566687	3.7394	6.04411	5.81351	3.95251	5e-05	0.00060523	yes	3
AC225338.3_FG001	3:126337212-126337750	0.0458045	3.12712	6.0932	5.81292	0.892346	5e-05	0.00060523	yes	3
AC234166.1_FG002	7:104421534-104428527	0.132222	7.96916	5.9134	5.81002	2.37017	5e-05	0.00060523	yes	3
AC235546.1_FG002	7:19658743-19659577	0.00479968	0.819228	7.41518	5.80813	0.48102	5e-05	0.00060523	yes	3
GRMZM2G164704	2:156981907-156982781	0.00363292	0.753595	7.69652	5.80764	0.350428	5e-05	0.00060523	yes	3
GRMZM5G894673	7:170185435-170186741	0.00755397	0.960104	6.98981	5.78827	0.38468	5e-05	0.00060523	yes	3
XLOC_014290	1:230256745-230256917	0.175763	10.2202	5.86165	5.78323	2.59765	5e-05	0.00060523	yes	3
ClusterV2_8	10:117487967-117493986	0.0013423	0.614557	8.83869	5.78305	1.18965	5e-05	0.00060523	yes	3
GRMZM2G499758	7:86499342-86499842	0.0159411	1.41355	6.47043	5.77811	0.794417	5e-05	0.00060523	yes	3
XLOC_109842	9:99117813-99118181	0.0129402	1.2468	6.59023	5.77573	0.492306	5e-05	0.00060523	yes	3
GRMZM2G336723	2:65495449-65495842	0.0169262	1.45755	6.42814	5.76826	0.65312	5e-05	0.00060523	yes	3
XLOC_037631	2:226395476-226395581	1.31252	71.7877	5.77333	5.76258	5.61911	5e-05	0.00060523	yes	3
GRMZM2G322717	4:202998283-202998859	0	0.52874	inf	5.75152	#NAME?	5e-05	0.00060523	yes	3
GRMZM2G162366	3:16251303-16260455	0	0.528385	inf	5.75057	#NAME?	5e-05	0.00060523	yes	3
GRMZM2G037299	5:59816979-59819365	0	0.524795	inf	5.74091	#NAME?	5e-05	0.00060523	yes	3
GRMZM2G035040	4:149553768-149557095	0	0.524681	inf	5.74061	#NAME?	5e-05	0.00060523	yes	3
GRMZM2G010058	8:159540737-159541404	0	0.524288	inf	5.73955	#NAME?	5e-05	0.00060523	yes	3
XLOC_077408	6:108253529-108253742	0.105995	6.14506	5.85736	5.72964	1.97634	5e-05	0.00060523	yes	3
XLOC_081446	6:87750482-87750633	0.304085	16.6514	5.77503	5.72921	3.24466	5e-05	0.00060523	yes	3
GRMZM5G807433	9:94937821-94938674	0	0.517645	inf	5.7215	#NAME?	5e-05	0.00060523	yes	3
AC211478.3_FG004	3:141520875-141524948	0.0142521	1.26717	6.47429	5.7187	0.662462	0.0027	0.0175721	yes	2
AC194296.3_FG001	3:186856852-186888845	0	0.515932	inf	5.7168	#NAME?	0.00195	0.0135313	yes	2
GRMZM2G571415	3:92895529-92896421	0.00854466	0.960737	6.81297	5.71	0.46377	5e-05	0.00060523	yes	2
GRMZM5G888387	10:98300680-98302314	0.00612707	0.824753	7.07262	5.69379	0.390159	5e-05	0.00060523	yes	2
XLOC_052748	4:117007745-117007840	3.69213	190.622	5.69012	5.68629	7.31095	5e-05	0.00060523	yes	2
Cluster_282	6:85198257-85199610	0.0108418	1.05396	6.60308	5.67382	1.51602	5e-05	0.00060523	yes	2
GRMZM2G157858	8:68138549-68140749	0.00461452	0.735392	7.31619	5.67252	0.337642	5e-05	0.00060523	yes	2
GRMZM2G096884	8:36012040-36013215	0	0.498695	inf	5.66873	#NAME?	5e-05	0.00060523	yes	2
GRMZM2G077055	1:25181084-25182192	0.0305389	2.04903	6.06815	5.66651	1.47798	5e-05	0.00060523	yes	2
Cluster_34	1:175548590-175549032	0.0297903	1.98485	6.05804	5.64772	1.1762	5e-05	0.00060523	yes	2
GRMZM2G008776	5:179011389-179012156	0	0.486799	inf	5.63459	#NAME?	5e-05	0.00060523	yes	2
GRMZM2G021676	10:14651449-14652887	0.0186462	1.40403	6.23455	5.62533	0.677001	5e-05	0.00060523	yes	2
XLOC_056458	4:902801-902871	24.0024	1183.11	5.62326	5.62267	29.0418	5e-05	0.00060523	yes	2
GRMZM2G021312	4:183228489-183229127	0	0.480577	inf	5.61641	#NAME?	5e-05	0.00060523	yes	2
AC203435.3_FG001	7:20044751-20045457	0.0362574	2.2495	5.95518	5.61018	1.03324	5e-05	0.00060523	yes	2
GRMZM2G701811	5:129939397-129940113	0.00406226	0.665183	7.35532	5.58538	0.343695	5e-05	0.00060523	yes	2
GRMZM2G569627	1:246983707-246985064	0.00610596	0.761172	6.96186	5.58139	0.414833	5e-05	0.00060523	yes	2
Cluster_136	3:2690772-2693062	0.0569894	3.19284	5.808	5.57928	4.63119	5e-05	0.00060523	yes	2
GRMZM2G392010	4:13945551-13947678	0	0.467796	inf	5.57832	#NAME?	5e-05	0.00060523	yes	2
XLOC_094785	8:67738474-67738790	0.0428927	2.51609	5.87431	5.57769	1.17374	5e-05	0.00060523	yes	2
GRMZM2G579335	8:161880106-161882368	13.3534	636.93	5.57585	5.5748	7.5718	5e-05	0.00060523	yes	2
GRMZM2G560811	5:184749786-184750463	0.133391	6.81342	5.67464	5.57247	3.63358	5e-05	0.00060523	yes	2
XLOC_091105	7:115213232-115214434	0.0194948	1.39198	6.1579	5.57086	2.18235	0.00285	0.018367	yes	2
XLOC_088399	7:167148109-167148641	0.0131759	1.08361	6.3618	5.56033	0.706176	5e-05	0.00060523	yes	2
Cluster_350	9:22391106-22392945	0.00140289	0.528069	8.55618	5.56032	0.357064	5e-05	0.00060523	yes	2
GRMZM2G141322	7:167674263-167675476	0.00572789	0.727213	6.98823	5.55068	0.687915	5e-05	0.00060523	yes	2
GRMZM2G500732	5:72185452-72186022	0	0.454376	inf	5.53722	#NAME?	5e-05	0.00060523	yes	2
GRMZM2G157586	2:222000807-222002106	0	0.453898	inf	5.53574	#NAME?	5e-05	0.00060523	yes	2
GRMZM2G086340	5:23853145-23854550	0.00976423	0.906487	6.53664	5.53515	1.13373	5e-05	0.00060523	yes	2
GRMZM2G313058_X_1	6:156956616-156964598	0.0273299	1.7185	5.97453	5.53305	1.39008	0.00875	0.0442738	yes	2
GRMZM5G800159	5:144889691-144890354	0.0144662	1.12034	6.27511	5.52982	0.915748	5e-05	0.00060523	yes	2
AC208221.3_FG002	2:38530563-38533170	0.411755	19.4279	5.5602	5.52632	4.8925	5e-05	0.00060523	yes	2
GRMZM2G151668	3:15169597-15171567	0.0170501	1.23204	6.17512	5.52093	2.08791	0.00185	0.0129764	yes	2
GRMZM2G309145	9:142282196-142290199	0.0953025	4.81196	5.65797	5.51701	4.97768	5e-05	0.00060523	yes	2
GRMZM5G874608	4:199889156-199892500	0.112898	5.61339	5.63578	5.51591	1.60843	0.0011	0.00858278	yes	2
XLOC_005461	1:213963562-213963733	0.14023	6.83952	5.60803	5.51076	2.03226	5e-05	0.00060523	yes	2
ClusterV2_18	9:135256154-135261858	0.00128139	0.50251	8.6153	5.50556	1.03441	5e-05	0.00060523	yes	2
GRMZM2G307308	7:29177982-29184962	0.0160732	1.17447	6.19121	5.50553	0.513959	0.01005	0.0494487	yes	2
GRMZM2G486480	3:183439100-183444846	3.28979	149.355	5.5046	5.50032	2.67654	0.00155	0.0113023	yes	2
GRMZM2G093390_O_1	1:128007-133082	0.0204614	1.36564	6.06053	5.49698	4.14209	5e-05	0.00060523	yes	2
Cluster_61	10:2647049-2647457	0.0203885	1.36004	6.05975	5.49455	0.781708	5e-05	0.00060523	yes	2
XLOC_027176	2:89873629-89874187	0.0565342	2.94266	5.70185	5.47178	1.59788	5e-05	0.00060523	yes	2
XLOC_031937	2:9604577-9604932	0.0868822	4.28732	5.62487	5.47106	2.33842	5e-05	0.00060523	yes	2
XLOC_061542	4:202542496-202542784	0.0296046	1.74498	5.88125	5.46964	0.776765	5e-05	0.00060523	yes	2
AC203742.3_FG012	9:137048190-137053367	0.00638203	0.711535	6.80078	5.46088	1.04386	0.0049	0.0282575	yes	2
XLOC_023811	10:132718552-132719297	0.0340811	1.92919	5.82288	5.45915	2.02472	0.00775	0.0402028	yes	2
XLOC_027525	2:108140914-108141152	0.0873251	4.24464	5.6031	5.45008	1.64611	5e-05	0.00060523	yes	2
GRMZM2G452475	5:217797787-217801725	0	0.427037	inf	5.44968	#NAME?	5e-05	0.00060523	yes	2
GRMZM2G306859	9:29174282-29177481	0.0147125	1.06025	6.17122	5.43656	1.86045	0.0064	0.0345936	yes	2
GRMZM2G304372	6:91952762-91953433	0.00932708	0.822281	6.46206	5.42838	0.643969	5e-05	0.00060523	yes	2
GRMZM2G445139	1:253459348-253464668	0.00594611	0.671192	6.81864	5.41679	0.918486	0.01015	0.049708	yes	2
GRMZM2G495241	3:186856852-186888845	0.00626698	0.684061	6.77021	5.41504	0.293157	0.00165	0.011869	yes	2
GRMZM2G155448	1:293085911-293112420	0.00351452	0.564757	7.32816	5.41037	0.349326	0.0046	0.0268581	yes	2
GRMZM2G517515	6:66327382-66327896	0.0293058	1.64719	5.81268	5.39785	1.2926	5e-05	0.00060523	yes	2
GRMZM2G043369	8:27502095-27502479	0.192119	8.36388	5.4441	5.37262	4.27163	0.00025	0.00252206	yes	2
GRMZM5G864536	2:225556906-225561645	0.00946597	0.795186	6.3924	5.3703	0.82401	5e-05	0.00060523	yes	2
GRMZM2G145440	4:21927207-21929100	0.00615418	0.65682	6.73779	5.36732	0.668818	5e-05	0.00060523	yes	2
XLOC_091249	7:120393728-120393850	1.66256	68.9676	5.37444	5.366	6.06493	5e-05	0.00060523	yes	2
GRMZM2G561369	4:2057545-2057888	0.0982627	4.39569	5.4833	5.34676	1.93077	5e-05	0.00060523	yes	2
GRMZM2G318958	4:108995814-108999202	0.0013427	0.44623	8.3765	5.32993	0.288282	5e-05	0.00060523	yes	2
GRMZM2G578962	2:114886088-114886280	0.111106	4.85286	5.44883	5.32746	1.76756	5e-05	0.00060523	yes	2
AC194712.3_FG002	4:151322914-151323673	0.0034568	0.528974	7.25761	5.32381	0.307611	5e-05	0.00060523	yes	2
Cluster_235	5:64550928-64554619	0.00219487	0.478153	7.76719	5.32299	1.0534	5e-05	0.00060523	yes	2
XLOC_019101	10:107249081-107249336	0.0326095	1.69127	5.69667	5.31929	0.73197	5e-05	0.00060523	yes	2
Cluster_107	2:108142025-108144811	0.0180662	1.10848	5.93914	5.31656	3.41846	5e-05	0.00060523	yes	2
GRMZM2G334941	5:48104770-48106164	0.00744661	0.683951	6.52117	5.31382	0.723475	5e-05	0.00060523	yes	2
AC197699.3_FG008	9:17063112-17064470	0.00706064	0.653112	6.53139	5.28051	0.466038	5e-05	0.00060523	yes	2
GRMZM2G536713	6:154780916-154781351	0.0760484	3.32268	5.44929	5.27539	2.31999	0.0031	0.0196044	yes	2
Cluster_368	9:132296506-132299365	0.00689196	0.641096	6.53948	5.26846	1.98425	0.00315	0.019856	yes	2
GRMZM2G117084	4:228807255-228808307	0.00685979	0.637577	6.53829	5.26339	0.687496	5e-05	0.00060523	yes	2
Cluster_135	3:655763-657654	0.0143498	0.919458	6.00168	5.25441	2.54068	0.00035	0.00332877	yes	2
GRMZM2G430983	6:79226255-79231827	0.00425037	0.531948	6.96755	5.24908	0.276259	5e-05	0.00060523	yes	2
GRMZM2G038825	5:213511920-213512331	0.00712899	0.637304	6.48214	5.23993	0.303787	5e-05	0.00060523	yes	2
siRNA_Z27kG1_12223	4:199889156-199892500	0.00722011	0.640227	6.47042	5.23878	0.764015	0.00205	0.0140845	yes	2
GRMZM2G703209	2:155296225-155296672	0.0136447	0.882067	6.01448	5.23756	0.433895	5e-05	0.00060523	yes	2
GRMZM2G092862	2:214005023-214006119	0.0241556	1.27441	5.72132	5.23284	1.08488	5e-05	0.00060523	yes	2
GRMZM5G829685	6:88457125-88457557	0.0197674	1.10685	5.80719	5.22956	0.545886	5e-05	0.00060523	yes	2
XLOC_102009	8:155839156-155839296	0.646363	24.3023	5.23261	5.21105	5.84111	5e-05	0.00060523	yes	2
GRMZM2G076204	2:13004988-13006923	0.0912976	3.73469	5.35427	5.20817	3.20044	0.00455	0.0266341	yes	2
XLOC_051129	4:33002165-33002275	0.839971	31.3983	5.2242	5.20759	7.20696	5e-05	0.00060523	yes	2
GRMZM2G034916	1:164852674-164853379	0.0390051	1.7985	5.52699	5.20572	2.08749	0.00245	0.0162608	yes	2
AC235534.1_FG007	10:136955705-136964480	0.0672341	2.8296	5.39526	5.20031	4.36286	5e-05	0.00060523	yes	2
GRMZM2G336213	3:129219807-129221047	0.146256	5.68781	5.2813	5.18842	3.87595	5e-05	0.00060523	yes	2
GRMZM2G051008	5:214980490-214981489	0.00286383	0.457908	7.32097	5.18483	0.250749	5e-05	0.00060523	yes	2
GRMZM2G001908	1:94422235-94423121	0.00711349	0.610354	6.42295	5.17989	0.631527	5e-05	0.00060523	yes	2
GRMZM2G525281	8:105518814-105518905	1.1426	41.3728	5.17829	5.16607	8.02915	5e-05	0.00060523	yes	2
XLOC_023932	10:135706842-135707094	0.0367318	1.66449	5.50191	5.16317	0.785057	5e-05	0.00060523	yes	2
AC198650.3_FG003	1:225399499-225400990	0.0180049	0.990722	5.78202	5.15922	1.25809	5e-05	0.000601858	yes	2
GRMZM5G881062	10:13376096-13376960	0.00386271	0.485018	6.97228	5.1582	0.335573	5e-05	0.00060523	yes	2
AC217401.3_FG004	1:264941011-264942971	0.00700201	0.597072	6.41399	5.15809	0.580674	5e-05	0.00060523	yes	2
Cluster_236	5:64555262-64556696	0.00600271	0.560613	6.54525	5.15612	0.904248	5e-05	0.00060523	yes	2
GRMZM2G104634	10:7160563-7161798	0.00501908	0.525422	6.70991	5.15581	0.552065	5e-05	0.00060523	yes	2
GRMZM2G081387	2:2408201-2473338	0.0454658	1.96447	5.43322	5.15372	1.47125	5e-05	0.00060523	yes	2
Cluster_319	8:14608540-14609495	0.0570976	2.372	5.37653	5.14977	2.64609	5e-05	0.00060523	yes	2
GRMZM2G001283	8:76751499-76753200	0.0381565	1.69045	5.46933	5.14204	2.64136	5e-05	0.00060523	yes	2
AC235534.1_FG006	10:136955245-136955492	0.0275245	1.31416	5.57727	5.1411	0.586897	5e-05	0.00060523	yes	2
GRMZM2G015671	6:66331349-66331918	0.0287928	1.35687	5.55844	5.13894	1.32796	5e-05	0.00060523	yes	2
Cluster_253	5:154696293-154697247	0.0241224	1.18761	5.62154	5.1333	1.84338	0.004	0.0240445	yes	2
GRMZM2G172338	10:76338488-76341579	0.00596835	0.550224	6.52654	5.13272	0.362136	5e-05	0.00060523	yes	2
GRMZM2G049047	2:85080532-85081892	0.00659627	0.571954	6.43811	5.13197	0.479699	5e-05	0.00060523	yes	2
XLOC_062671	4:238857244-238857453	0.0733405	2.87331	5.29196	5.11256	1.23945	5e-05	0.00060523	yes	2
GRMZM2G591691	1:156761686-156761821	0.420363	14.5252	5.11078	5.07785	4.38266	5e-05	0.00060523	yes	2
GRMZM2G059642	3:147325267-147331515	0.64487	22.0373	5.09479	5.07325	0.366324	5e-05	0.00060523	yes	2
AC213651.3_FG005	9:44668282-44670432	0.0417132	1.71341	5.36023	5.05859	1.12853	5e-05	0.00060523	yes	2
Cluster_108	2:108148326-108149473	0.0273838	1.23346	5.49325	5.0558	2.52507	0.00025	0.00252206	yes	2
GRMZM2G401291	10:39139118-39142509	0.142918	5.07125	5.14908	5.05435	3.40863	0.0097	0.0481164	yes	2
GRMZM2G176129	2:180812766-180815898	0.0608237	2.34092	5.2663	5.05285	2.74326	5e-05	0.00060523	yes	2
GRMZM5G883051	3:58005276-58005663	0.0117205	0.710074	5.92087	5.05102	0.422774	5e-05	0.00060523	yes	2
GRMZM2G136372	1:177903253-177904176	0.00704336	0.553799	6.29695	5.0479	0.643779	5e-05	0.00060523	yes	2
GRMZM2G072823	2:45719560-45719761	0.0752488	2.80901	5.22225	5.04737	1.19983	5e-05	0.00060523	yes	2
GRMZM2G177061	5:145149829-145152915	0.0718456	2.69612	5.22984	5.04718	2.85176	5e-05	0.00060523	yes	2
GRMZM2G075732	3:211902641-211903847	0.00638858	0.531579	6.37864	5.04641	0.436287	5e-05	0.00060523	yes	2
GRMZM2G328877	7:86498093-86498739	0.0244997	1.11292	5.50545	5.02453	0.681882	5e-05	0.00060523	yes	2
GRMZM5G867020	2:134855595-134856153	0.0108097	0.661108	5.93449	5.01122	0.560649	5e-05	0.00060523	yes	2
GRMZM2G154016	3:215065659-215066617	0.00455872	0.458916	6.65345	5.00937	0.314679	5e-05	0.00060523	yes	2
GRMZM2G473104	9:112826698-112840577	0.0138132	0.75008	5.76292	4.99632	0.654874	0.0001	0.00113386	yes	2
AC191360.3_FG016	4:238832691-238832976	0.0909395	3.20983	5.14145	4.99542	1.88881	5e-05	0.00060523	yes	2
GRMZM2G123820	6:106215729-106217398	0.0796624	2.83671	5.15417	4.98865	2.60753	5e-05	0.00060523	yes	2
GRMZM2G162388	4:105204216-105205395	0.0725731	2.60458	5.16547	4.98476	3.10746	5e-05	0.00060523	yes	2
XLOC_010221	1:61715349-61715425	5.35037	168.332	4.97552	4.97292	26.1737	5e-05	0.00060523	yes	2
GRMZM2G027513	7:122481016-122481394	0.0143898	0.754114	5.71166	4.96944	0.482079	5e-05	0.00060523	yes	2
AC209905.4_FG002	3:199855085-199857312	0.00437965	0.439402	6.64858	4.96591	0.337925	5e-05	0.00060523	yes	2
GRMZM2G590958	8:161283057-161283942	2.0144	63.0687	4.9685	4.96159	6.4557	5e-05	0.00060523	yes	2
GRMZM2G465283	5:187537365-187540019	0.00560539	0.476236	6.40872	4.96154	0.332138	5e-05	0.00060523	yes	2
GRMZM2G523120	5:100784621-100784720	1.73227	54.1973	4.96749	4.95945	4.40221	5e-05	0.00060523	yes	2
XLOC_112621	scaffold_509:228324-228485	0.205508	6.65762	5.01774	4.95136	2.51612	5e-05	0.00060523	yes	2
XLOC_024213	10:142404378-142404664	0.0320262	1.29005	5.33204	4.95113	0.750013	5e-05	0.00060523	yes	2
XLOC_026078	2:42236086-42236340	0.0481555	1.78529	5.21232	4.94816	0.970897	5e-05	0.00060523	yes	2
GRMZM2G170799	3:22973975-22974318	0.0501751	1.8321	5.19039	4.93604	1.26455	5e-05	0.00060523	yes	2
GRMZM2G002595	6:31564209-31565724	0.0423986	1.58343	5.22289	4.92646	2.21396	0.0008	0.00661365	yes	2
GRMZM2G338693	5:17212984-17288687	0.0419179	1.56538	5.22281	4.92332	0.922401	5e-05	0.00060523	yes	2
GRMZM2G488126	6:156616486-156617781	0.0656147	2.27588	5.11626	4.91794	1.66773	5e-05	0.00060523	yes	2
AC208511.3_FG002_O_1	4:193040812-193051439	1.48342	44.938	4.92094	4.91157	4.98855	0.00945	0.0471348	yes	2
GRMZM2G127521	1:268409606-268412985	0.0940098	3.1012	5.04387	4.90268	3.36142	5e-05	0.00060523	yes	2
XLOC_036924	2:208548360-208548729	0.0395099	1.45765	5.20529	4.88965	1.12214	5e-05	0.00060523	yes	2
GRMZM2G011719	1:66787299-66792809	0.0197222	0.867052	5.45823	4.88305	0.463063	0.0058	0.0321322	yes	2
XLOC_022049	10:69608739-69608892	0.260583	7.94961	4.93107	4.87855	2.95806	5e-05	0.00060523	yes	2
GRMZM2G568820	7:130145913-130146008	1.17655	34.7599	4.88479	4.87299	8.19628	5e-05	0.00060523	yes	2
GRMZM2G033472	3:194475744-194476659	0.00451122	0.414005	6.51999	4.86884	0.395929	5e-05	0.00060523	yes	2
GRMZM2G055054	1:281817258-281844826	0.0107897	0.597387	5.79093	4.86868	1.12785	0.00395	0.0237955	yes	2
AC186338.3_FG001	1:143005899-143006175	0.327663	9.83328	4.90739	4.86548	3.50141	5e-05	0.00060523	yes	2
XLOC_043975	3:230707388-230707671	0.0718299	2.35044	5.0322	4.85028	1.45277	5e-05	0.00060523	yes	2
GRMZM2G475990	6:75084983-75085886	0.0527484	1.79771	5.09089	4.84844	2.3972	0.00115	0.00890855	yes	2
GRMZM2G043112	2:146200994-146202054	0.00912167	0.540086	5.88775	4.84638	0.460537	5e-05	0.00060523	yes	2
AC217840.3_FG005	5:162970908-162971286	0.0214268	0.882487	5.36409	4.82776	0.669092	5e-05	0.00060523	yes	2
GRMZM2G116478	9:113757853-113758676	0.00973376	0.548492	5.81633	4.8228	0.748454	5e-05	0.00060523	yes	2
Cluster_105	2:108134925-108136012	0.0495692	1.6719	5.0759	4.81938	2.56585	5e-05	0.00060523	yes	2
GRMZM2G116487	9:113759678-113760288	0.00828899	0.506043	5.93192	4.81844	0.472541	5e-05	0.00060523	yes	2
GRMZM2G458401	4:190786911-190793047	0.0191932	0.807722	5.39519	4.80791	2.69519	5e-05	0.00060523	yes	2
XLOC_015573	1:270124174-270124387	0.130401	3.92239	4.91071	4.80778	1.86868	5e-05	0.00060523	yes	2
GRMZM2G425136	5:68388590-68389136	0.0103866	0.558727	5.74935	4.80204	0.437583	5e-05	0.00060523	yes	2
GRMZM2G019090	3:136292386-136351651	0.255659	7.34252	4.84398	4.79059	3.64297	5e-05	0.00060523	yes	2
Cluster_8	1:51161157-51161608	0.0216293	0.863637	5.31937	4.7877	0.799477	5e-05	0.00060523	yes	2
GRMZM2G383125	6:141464462-141466213	0.0781386	2.42189	4.95395	4.78616	2.84517	5e-05	0.00060523	yes	2
GRMZM2G345553	1:268937052-268942296	0.00698435	0.457492	6.03348	4.78266	0.810019	5e-05	0.00060523	yes	2
GRMZM2G099945	9:37968199-37968661	0.0844957	2.57851	4.93152	4.77573	2.30945	0.0009	0.00729152	yes	2
GRMZM2G437627	2:56324679-56327083	0.0485256	1.59275	5.03663	4.77534	1.40295	5e-05	0.00060523	yes	2
GRMZM2G152054	6:157416954-157418101	0.00847508	0.495733	5.87019	4.77472	0.428236	5e-05	0.00060523	yes	2
GRMZM2G488333	1:145777915-145778030	2.96014	81.246	4.77856	4.77387	11.8445	5e-05	0.00060523	yes	2
XLOC_089504	7:23305386-23305556	0.175716	5.05382	4.84605	4.76906	2.16122	5e-05	0.00060523	yes	2
Cluster_59	1:291171381-291172317	0.162067	4.64786	4.8419	4.75862	3.63925	5e-05	0.00060523	yes	2
GRMZM2G560756	3:176614360-176614501	0.148629	4.27426	4.84588	4.75532	1.55294	5e-05	0.00060523	yes	2
GRMZM2G453855	4:28011971-28039866	0.0196009	0.787111	5.32757	4.75107	0.520155	5e-05	0.00060523	yes	2
GRMZM2G115476	1:167824438-167825661	0.0203182	0.805977	5.30989	4.75027	1.05965	5e-05	0.00060523	yes	2
GRMZM2G501603	3:57276076-57276434	0.0222327	0.855421	5.26588	4.74681	0.651503	5e-05	0.00060523	yes	2
GRMZM2G061016	4:238853763-238855037	0.0747718	2.25582	4.91501	4.74031	2.53596	5e-05	0.00060523	yes	2
GRMZM2G027530	8:121107595-121110692	0.0129288	0.602343	5.54192	4.73911	0.970024	5e-05	0.00060523	yes	2
GRMZM2G547408	10:90325097-90352125	0.448666	12.1465	4.75875	4.72814	0.223371	0.00385	0.023305	yes	2
GRMZM2G354956	5:1767086-1768251	0.0094144	0.501949	5.73653	4.7208	0.652553	5e-05	0.00060523	yes	2
GRMZM2G055114	1:113847686-113848453	0.00920354	0.49058	5.73616	4.70416	0.649591	5e-05	0.00060523	yes	2
GRMZM2G406547	1:91026231-91026393	0.511016	13.5705	4.73096	4.70407	4.36266	5e-05	0.00060523	yes	2
GRMZM2G552908	7:141722290-141722542	0.042567	1.35841	4.99604	4.7022	0.821547	5e-05	0.00060523	yes	2
GRMZM5G815877	1:41139582-41140089	0.0170558	0.692683	5.34386	4.69886	0.713974	5e-05	0.00060523	yes	2
GRMZM2G020014	3:143708112-143709351	0.00804568	0.450131	5.80599	4.67232	0.558469	5e-05	0.00060523	yes	2
GRMZM2G333726	3:183360305-183360928	0.0131627	0.575711	5.45082	4.66031	0.690781	5e-05	0.00060523	yes	2
siRNA_Z27kG1_18210	8:20562432-20567278	0.00657735	0.406287	5.94885	4.65029	0.0696271	0.0002	0.00208081	yes	2
AC213836.3_FG001	1:247278008-247280480	0.0226571	0.806552	5.15373	4.64408	0.627432	5e-05	0.00060523	yes	2
GRMZM2G389065	2:207078278-207079661	0.0126076	0.554597	5.45907	4.64234	0.662258	5e-05	0.00060523	yes	2
AC213691.4_FG001	3:134482623-134482965	0.0174446	0.673039	5.26984	4.63737	0.489657	5e-05	0.00060523	yes	2
XLOC_027529	2:108147314-108147532	0.200925	5.23581	4.70368	4.63636	2.75397	5e-05	0.00060523	yes	2
AC208040.3_FG002	1:39234536-39235180	0.0607205	1.73797	4.83907	4.62741	1.66312	0.00015	0.00160088	yes	2
GRMZM2G525283	8:105527554-105527988	0.0402264	1.23123	4.93581	4.62718	1.22323	5e-05	0.00060523	yes	2
GRMZM2G534292	2:1445143-1445270	0.298589	7.59581	4.66897	4.62334	2.69479	5e-05	0.00060523	yes	2
GRMZM2G470871	3:122186414-122187676	0.0239862	0.826272	5.10634	4.62095	0.62874	5e-05	0.00060523	yes	2
GRMZM2G487852	9:142272124-142272806	0.0379949	1.1666	4.94036	4.6156	1.18333	0.00705	0.0373795	yes	2
GRMZM2G591452	9:148491783-148492225	0.0208053	0.742571	5.1575	4.61058	0.71537	5e-05	0.00060523	yes	2
AC203863.3_FG007	8:3531307-3531679	0.032012	1.01258	4.98328	4.60527	0.887081	5e-05	0.00060523	yes	2
GRMZM2G449056	9:22056386-22057807	0.323747	7.99659	4.62645	4.58436	2.62423	5e-05	0.00060523	yes	2
siRNA_Z27kG1_20816	7:155623681-155626139	0.0129213	0.535378	5.37273	4.5725	0.269472	0.00245	0.0162608	yes	2
GRMZM2G115814	9:137048190-137053367	0.00858452	0.430225	5.64721	4.56607	1.70789	0.00015	0.00161686	yes	2
GRMZM2G151468	9:129593424-129594529	0.0194543	0.678703	5.12462	4.54733	1.60502	5e-05	0.00060523	yes	2
GRMZM2G028640	2:46587165-46588042	0.871094	20.2741	4.54067	4.52491	5.19781	5e-05	0.00060523	yes	2
GRMZM2G056543	8:6539682-6540203	0.012965	0.514996	5.31187	4.5148	0.570853	5e-05	0.00060523	yes	2
GRMZM2G497001	10:51048907-51049018	0.767977	17.7715	4.53236	4.51451	5.72584	5e-05	0.00060523	yes	2
AC194091.2_FG001	1:259973630-259974613	0.0302819	0.910514	4.91015	4.51424	0.600315	5e-05	0.00060523	yes	2
Cluster_80	10:148038575-148039988	0.0794766	2.03432	4.67787	4.51397	2.62655	5e-05	0.00060523	yes	2
GRMZM2G161326	5:168433283-168433978	0.0346399	1.00923	4.86469	4.513	1.19991	5e-05	0.000601858	yes	2
GRMZM2G166147	4:238032252-238033263	0.0332528	0.975034	4.8739	4.50931	1.73549	0.0002	0.00208081	yes	2
GRMZM2G700863	6:8214924-8215606	0.0611351	1.60565	4.71501	4.50541	2.54589	0.00025	0.00252206	yes	2
XLOC_049440	3:216617597-216617724	0.733953	16.8525	4.52113	4.50246	5.48451	5e-05	0.00060523	yes	2
GRMZM2G104718	4:122493656-122496546	0.0190402	0.642285	5.07609	4.48938	1.74369	0.00015	0.00161686	yes	2
GRMZM2G361108	1:236482657-236483559	0.0472228	1.27145	4.75084	4.48504	2.01583	0.0001	0.00113386	yes	2
GRMZM2G504614	9:7482136-7482499	0.035932	1.01383	4.8184	4.47833	0.933536	5e-05	0.00060523	yes	2
GRMZM2G495791	2:66698907-66699019	0.422781	9.63297	4.51	4.47777	3.24086	5e-05	0.00060523	yes	2
Cluster_17	1:115625867-115634676	0.0373317	1.0428	4.80391	4.47528	4.98997	5e-05	0.00060523	yes	2
GRMZM2G019085	2:72237252-72237872	0.0471284	1.25694	4.73718	4.471	1.86598	5e-05	0.000601858	yes	2
GRMZM2G006878	7:6947402-6951504	0.0669648	1.69348	4.66044	4.46814	3.06724	5e-05	0.00060523	yes	2
GRMZM2G020696	10:31207022-31210154	0.0376504	1.04422	4.79361	4.46754	1.65739	0.00245	0.0162608	yes	2
GRMZM2G547645	4:219639142-219640763	0.0346987	0.978287	4.8173	4.46663	2.82165	5e-05	0.00060523	yes	2
GRMZM2G155986	10:141068618-141068816	0.100789	2.40687	4.57774	4.44725	1.39067	5e-05	0.00060523	yes	2
GRMZM2G015832	2:81686161-81687241	0.0817223	1.9892	4.60531	4.44601	2.36297	5e-05	0.00060523	yes	2
GRMZM2G520325	1:261367288-261367521	1.09287	23.9078	4.45129	4.43875	4.54228	5e-05	0.00060523	yes	2
Cluster_106	2:108138368-108139475	0.127372	2.95644	4.53674	4.43257	3.46095	5e-05	0.00060523	yes	2
GRMZM2G065979	2:100526135-100526457	0.169496	3.83121	4.49848	4.41954	2.21209	5e-05	0.00060523	yes	2
GRMZM2G028218	5:4684603-4688560	0.165375	3.73351	4.49672	4.41588	3.13139	5e-05	0.00060523	yes	2
GRMZM2G372093	2:226478553-226482362	0.0233237	0.679299	4.86418	4.37051	2.14149	0.001	0.00792822	yes	2
GRMZM2G136868	1:7763880-7765794	0.0185698	0.578812	4.96207	4.36524	0.908202	5e-05	0.00060523	yes	2
GRMZM2G054892	4:213539913-213543177	0.102023	2.28371	4.48441	4.35582	1.99646	5e-05	0.00060523	yes	2
XLOC_081700	6:95476780-95476939	54.8443	1121.23	4.3536	4.35335	3.83017	5e-05	0.00060523	yes	2
GRMZM5G835036	10:19031101-19031911	0.0612659	1.44629	4.56112	4.35294	2.19405	5e-05	0.00060523	yes	2
GRMZM2G138479	4:222906312-222907003	0.0628861	1.47774	4.55451	4.35133	2.47389	0.0004	0.00371968	yes	2
XLOC_012300	1:159954211-159954408	0.493361	10.1801	4.36696	4.33943	3.62784	0.0001	0.00112111	yes	2
GRMZM2G542402	7:88049642-88049766	0.447807	9.0816	4.342	4.31172	3.60164	5e-05	0.00060523	yes	2
GRMZM5G892271	10:39014524-39015381	0.0649252	1.47533	4.50612	4.30919	2.37964	5e-05	0.00060523	yes	2
GRMZM2G446426	4:191720337-191722587	0.0389656	0.959681	4.62228	4.30767	2.17409	0.0001	0.00113386	yes	2
AC194044.3_FG001	1:89867388-89867674	0.0478873	1.12122	4.54928	4.28849	0.956568	5e-05	0.00060523	yes	2
GRMZM2G086486	2:31897222-31902143	0.0489418	1.13005	4.52917	4.27366	2.73812	0.00025	0.00252206	yes	2
GRMZM2G077482	2:220726566-220727345	0.0174502	0.518465	4.89293	4.26692	0.628446	5e-05	0.00060523	yes	2
GRMZM2G485087	1:48935123-48936314	0.152227	3.09262	4.34453	4.2574	2.70543	5e-05	0.00060523	yes	2
AC197681.3_FG001	10:6485632-6486247	0.163663	3.30244	4.33473	4.25353	1.52422	0.0001	0.00113386	yes	2
GRMZM2G115149	5:7824707-7825324	0.0171446	0.500528	4.86762	4.23325	0.574244	5e-05	0.00060523	yes	2
GRMZM2G059361	9:25871262-25871953	0.0202197	0.552214	4.77139	4.21756	0.707558	5e-05	0.00060523	yes	2
GRMZM5G825504	5:30513502-30513802	0.0660019	1.39876	4.4055	4.21225	1.24795	5e-05	0.00060523	yes	2
XLOC_041515	3:151493519-151493697	0.696907	12.9086	4.21123	4.19179	3.81234	0.00745	0.0389427	yes	2
XLOC_041407	3:146826322-146826585	0.147728	2.86308	4.27655	4.18709	2.02914	5e-05	0.00060523	yes	2
GRMZM2G485878	8:28383706-28383832	0.339967	6.33062	4.21888	4.17933	2.72439	5e-05	0.00060523	yes	2
GRMZM2G476076	5:175705614-175707357	0.101302	2.00547	4.3072	4.17856	2.91524	5e-05	0.00060523	yes	2
GRMZM2G018793	3:93198078-93199928	0.166952	3.1924	4.25714	4.17772	3.97548	5e-05	0.00060523	yes	2
Cluster_339	8:166455242-166456875	0.0965857	1.91354	4.30829	4.17368	3.585	5e-05	0.00060523	yes	2
GRMZM2G063055	1:62229258-62230399	0.240451	4.49332	4.22397	4.16839	4.06513	5e-05	0.00060523	yes	2
XLOC_066714	5:154097700-154098063	0.0232157	0.584425	4.65384	4.16156	0.607191	5e-05	0.00060523	yes	2
GRMZM2G043565_X_1	4:232592186-232595673	0.247331	4.59284	4.21487	4.16083	2.92713	5e-05	0.00060523	yes	2
GRMZM2G510796_X_1	8:168368346-168379461	0.0655945	1.3284	4.33997	4.14608	0.993289	0.0007	0.00591267	yes	2
GRMZM2G098750	9:19026220-19027674	0.0220643	0.557013	4.65792	4.14434	1.98256	0.0009	0.00729152	yes	2
XLOC_018867	10:97673978-97674225	0.552103	9.9133	4.16636	4.14191	3.37669	0.0001	0.00113386	yes	2
XLOC_015568	1:270045955-270046112	1.32182	23.2209	4.13483	4.12457	6.24642	0.0025	0.0165475	yes	2
GRMZM2G542875_X_1	9:16324264-16324623	1.44192	25.1964	4.12716	4.11776	4.22917	5e-05	0.00060523	yes	2
GRMZM2G082966	8:104578682-104580288	0.0781309	1.51797	4.28011	4.11582	2.46896	0.00035	0.00332877	yes	2
GRMZM2G062042	8:87024920-87031981	0.0638746	1.26884	4.31212	4.11361	3.0346	5e-05	0.00060523	yes	2
GRMZM2G368826_X_1	9:4115292-4118026	9.02196	156.253	4.1143	4.11279	0.483818	0.0011	0.00858278	yes	2
GRMZM2G535212	1:110503465-110504892	0.172083	3.13803	4.18869	4.11178	3.19702	5e-05	0.00060523	yes	2
GRMZM2G013849	9:142276207-142276910	0.186442	3.38259	4.18133	4.11021	3.07585	5e-05	0.00060523	yes	2
GRMZM2G131715_X_1	1:230259928-230260966	1.29789	22.3798	4.10795	4.09753	2.13902	0.0039	0.02356	yes	2
GRMZM2G023827	8:167667210-167669255	0.476752	8.31934	4.12516	4.09694	5.32682	5e-05	0.00060523	yes	2
GRMZM2G333635	8:13046491-13047248	0.53772	9.35789	4.12125	4.09621	4.19839	5e-05	0.00060523	yes	2
GRMZM2G001388	2:230371287-230373193	0.0225364	0.545464	4.59716	4.09357	1.84925	5e-05	0.00060523	yes	2
GRMZM2G703575	1:55817529-55818215	0.171234	3.07934	4.16858	4.09137	2.95776	5e-05	0.00060523	yes	2
GRMZM2G478779	1:287369588-287376326	0.0884945	1.65231	4.22275	4.077	1.77982	0.00035	0.00332877	yes	2
GRMZM2G072621_O_1	10:71876177-71877289	0.392259	6.7747	4.11028	4.07609	3.1348	5e-05	0.00060523	yes	2
GRMZM2G339389	3:141713750-141714277	0.166685	2.96142	4.15109	4.0719	2.83189	0.00045	0.00410897	yes	2
GRMZM2G491645	2:42990647-42990758	0.631678	10.756	4.08981	4.06849	4.27008	5e-05	0.00060523	yes	2
GRMZM2G563414	8:111886098-111886191	1.11049	18.7108	4.07461	4.06244	6.29797	5e-05	0.00060523	yes	2
Cluster_340	8:166457787-166458494	0.257	4.39463	4.0959	4.04411	3.30766	5e-05	0.00060523	yes	2
GRMZM2G500099	2:32868650-32869013	0.0351493	0.734296	4.38479	4.0431	0.860626	5e-05	0.00060523	yes	2
GRMZM2G108692	1:242270531-242272081	0.0359731	0.747665	4.3774	4.0427	1.82186	0.0014	0.0104076	yes	2
GRMZM2G360389	4:141548092-141555023	0.119145	2.11695	4.1512	4.04172	2.77917	5e-05	0.00060523	yes	2
GRMZM5G816567	10:136913822-136914359	0.101433	1.81722	4.16313	4.0354	2.29336	0.00115	0.00890855	yes	2
GRMZM2G564355	8:166416055-166416493	0.0379348	0.773047	4.34896	4.02995	1.03647	5e-05	0.00060523	yes	2
GRMZM2G396482	1:84070969-84077732	0.0204028	0.485872	4.57373	4.02769	0.325944	0.00235	0.0157098	yes	2
GRMZM2G078189	6:82450301-82458195	0.121729	2.12705	4.12711	4.01998	2.48091	0.00025	0.00252206	yes	2
XLOC_054918	4:193051841-193051952	15.612	252.423	4.01511	4.01425	5.99063	5e-05	0.00060523	yes	2
GRMZM2G004314	3:182480486-182528725	0.320296	5.32603	4.05558	4.01394	2.25349	5e-05	0.00060523	yes	2
XLOC_097773	8:168368346-168379461	0.467117	7.63531	4.03083	4.00216	1.35041	0.0022	0.0149147	yes	2
GRMZM2G580648	3:195324780-195326753	0.0323039	0.666524	4.36688	3.99928	0.839256	5e-05	0.00060523	yes	2
XLOC_088398	7:167141699-167142361	0.10736	1.8507	4.10753	3.98683	2.6242	5e-05	0.00060523	yes	2
GRMZM5G894432	1:219389481-219392032	0.0694972	1.24315	4.1609	3.97851	1.77283	5e-05	0.00060523	yes	2
GRMZM2G064862	2:203096746-203098974	0.241084	3.94338	4.03183	3.97684	3.3665	5e-05	0.00060523	yes	2
GRMZM5G884058	3:41882498-41882880	0.0489035	0.915844	4.22709	3.97434	0.829358	5e-05	0.00060523	yes	2
GRMZM2G106404	5:178364312-178366052	0.0244477	0.531218	4.44153	3.97373	0.645866	0.00675	0.0362036	yes	2
GRMZM2G517181	7:162087198-162088106	0.227592	3.71275	4.02796	3.96981	2.05352	0.0001	0.00113386	yes	2
GRMZM2G542877	5:68572615-68572728	1.09601	17.3188	3.98201	3.96974	6.85565	5e-05	0.00060523	yes	2
XLOC_041516	3:151493996-151503381	1.03379	16.2297	3.97262	3.95962	4.11055	0.00055	0.00487218	yes	2
GRMZM2G122116	7:175323050-175332481	1.17619	18.3728	3.96538	3.95395	7.41278	5e-05	0.00060523	yes	2
GRMZM2G140107	3:161295500-161301332	0.190293	3.08988	4.02126	3.95203	4.92119	5e-05	0.00060523	yes	2
GRMZM2G408834	1:379243-385788	0.0606626	1.08106	4.1555	3.94864	2.71757	5e-05	0.00060523	yes	2
GRMZM2G115814_O_1	9:137048190-137053367	0.0274438	0.567464	4.36997	3.94693	1.49638	0.00175	0.0124229	yes	2
XLOC_012834	1:180846714-180846974	0.485909	7.63058	3.97304	3.94553	3.01627	0.0001	0.00113386	yes	2
GRMZM2G104772	5:93916380-93917351	0.078838	1.3357	4.08256	3.92104	2.09513	5e-05	0.00060523	yes	2
GRMZM2G476049	5:175705614-175707357	0.0469094	0.851794	4.18256	3.9206	1.86266	0.0008	0.00661365	yes	2
XLOC_097692	8:166962529-166963079	0.0994358	1.64062	4.04433	3.91485	1.85973	0.00035	0.00332877	yes	2
AC231409.1_FG001	2:16953196-16953661	0.110651	1.80922	4.03128	3.91441	2.36453	0.00025	0.00252206	yes	2
GRMZM5G884151	9:142272124-142272806	1.42734	21.4947	3.91257	3.90318	4.48258	5e-05	0.00060523	yes	2
GRMZM2G465226	7:3487008-3488071	0.284643	4.39521	3.94871	3.90217	3.33172	5e-05	0.00060523	yes	2
XLOC_012294	1:159937461-159937630	1.75376	26.0821	3.89454	3.88689	4.59916	0.0006	0.00522113	yes	2
GRMZM2G066333	3:150159836-150160675	0.042711	0.767083	4.16671	3.88189	2.00996	0.0007	0.00591267	yes	2
XLOC_096730	8:143153125-143153439	0.0646631	1.09023	4.07555	3.88127	1.15247	5e-05	0.00060523	yes	2
XLOC_060500	4:170827859-170829345	0.547761	8.19888	3.90381	3.87947	3.96751	5e-05	0.00060523	yes	2
XLOC_020477	10:148037481-148038454	0.134154	2.09225	3.9631	3.86625	2.85571	5e-05	0.00060523	yes	2
GRMZM2G031150	10:4765779-4765961	0.865449	12.7254	3.87811	3.86268	3.85432	0.0008	0.00661365	yes	2
GRMZM2G163462	1:19581865-19582247	0.0514462	0.882178	4.09993	3.85994	1.12285	5e-05	0.00060523	yes	2
GRMZM2G317455	5:204587015-204594173	0.0451605	0.788089	4.12523	3.85484	2.17071	5e-05	0.00060523	yes	2
GRMZM2G110742	7:57077559-57082391	0.0671498	1.10611	4.04196	3.85467	2.24371	5e-05	0.00060523	yes	2
AC208614.3_FG001	7:96371418-96372079	0.159033	2.42753	3.93209	3.85004	1.78906	5e-05	0.00060523	yes	2
GRMZM2G055656	4:151339687-151340120	0.197746	2.97513	3.91123	3.8449	2.52091	5e-05	0.00060523	yes	2
GRMZM2G551871	1:249810093-249810441	0.137418	2.09873	3.93288	3.83839	1.86743	0.0001	0.00113386	yes	2
GRMZM2G009435	1:70049054-70072045	0.0331336	0.602611	4.18486	3.82809	1.82918	0.0004	0.00371968	yes	2
GRMZM2G568336	5:178404315-178404422	0.592133	8.54077	3.85037	3.8279	3.6859	0.0002	0.00208081	yes	2
GRMZM2G106850	6:161561896-161563857	0.0222863	0.446696	4.32506	3.82224	1.45216	0.00255	0.0168069	yes	2
Cluster_147	3:65922248-65922821	0.674121	9.64557	3.83879	3.81904	4.39817	5e-05	0.00060523	yes	2
GRMZM2G367270_O_1	2:102917960-102919006	0.127352	1.91464	3.91019	3.80864	2.28889	0.00765	0.0398489	yes	2
GRMZM2G581659	5:43286169-43286260	1.55526	21.7929	3.80863	3.80005	7.90795	5e-05	0.00060523	yes	2
GRMZM2G329962	4:68537490-68540538	24.0126	332.072	3.78963	3.78908	5.68505	5e-05	0.00060523	yes	2
Cluster_219	4:193052742-193053474	0.0680362	1.06874	3.97346	3.78906	2.01155	5e-05	0.00060523	yes	2
AC193414.4_FG002	10:60655586-60656009	0.0550574	0.886821	4.00963	3.78503	0.975872	5e-05	0.00060523	yes	2
GRMZM2G148693	2:236669674-236679078	0.0512512	0.833848	4.02413	3.78417	1.90281	0.00365	0.0223624	yes	2
GRMZM2G300238	10:120474201-120480287	0.107092	1.59941	3.90062	3.78082	2.03447	5e-05	0.00060523	yes	2
GRMZM2G374068	4:239952898-239960839	0.0544811	0.875469	4.00623	3.77949	0.271562	0.00145	0.0107219	yes	2
GRMZM2G030583	6:107478551-107483274	0.100338	1.4942	3.89644	3.76899	2.66563	5e-05	0.00060523	yes	2
GRMZM2G519381	1:55271664-55271774	21.5659	293.775	3.76789	3.76727	6.44575	5e-05	0.00060523	yes	2
GRMZM2G181168	7:118115954-118116303	0.0348489	0.600074	4.10596	3.76584	0.769743	5e-05	0.00060523	yes	2
XLOC_107824	9:13369008-13369358	0.109334	1.60952	3.87982	3.76249	1.88783	0.00015	0.00160088	yes	2
GRMZM5G838240_X_2	2:66023111-66025637	0.0963898	1.42883	3.88981	3.75746	0.487575	0.00095	0.00761724	yes	2
XLOC_041274	3:141153034-141155370	0.763709	10.4465	3.77385	3.75647	3.84993	0.00015	0.00161686	yes	2
XLOC_002632	1:86326199-86326457	0.301073	4.18734	3.79785	3.75415	2.25409	0.00045	0.00410897	yes	2
GRMZM2G456997	7:3252462-3253275	1.31822	17.7707	3.75283	3.74275	3.85926	5e-05	0.00060523	yes	2
GRMZM2G367001	8:33314735-33321992	0.0297644	0.521214	4.13022	3.73974	1.75069	0.00125	0.00950704	yes	2
GRMZM2G432560	1:290337500-290359098	0.0375066	0.62188	4.05142	3.73345	0.322359	5e-05	0.00060523	yes	2
GRMZM2G160515	2:223920915-223921650	0.122308	1.71709	3.81138	3.70637	2.20587	5e-05	0.00060523	yes	2
GRMZM2G113994	9:118692699-118699285	0.0721759	1.06084	3.87755	3.70388	2.45944	0.0069	0.0367899	yes	2
GRMZM2G116896	3:16898796-16899701	0.681549	8.95286	3.71546	3.69606	3.49573	5e-05	0.00060523	yes	2
GRMZM2G519682	10:93404669-93404789	0.799517	10.4692	3.71088	3.69432	4.9983	5e-05	0.00060523	yes	2
GRMZM5G883201_X_1	3:202437758-202453932	0.279064	3.73083	3.74083	3.6939	1.45141	0.00255	0.0167728	yes	2
GRMZM2G367270	2:102917960-102919006	0.124541	1.71453	3.78312	3.68009	1.19221	0.00485	0.028019	yes	2
GRMZM2G529175	1:13089586-13089865	0.460912	6.00742	3.70418	3.67562	2.92663	0.00065	0.00557143	yes	2
XLOC_082766	6:129480162-129480579	0.11388	1.57006	3.78524	3.67296	2.22308	0.00165	0.011869	yes	2
GRMZM2G544521	1:282105929-282106148	3.64013	46.5303	3.67611	3.67246	3.68233	5e-05	0.00060523	yes	2
Cluster_16	1:115618938-115621006	0.0455045	0.696217	3.93545	3.66943	2.54391	5e-05	0.00060523	yes	2
XLOC_014289	1:230254124-230254755	0.0944851	1.31532	3.79918	3.66497	1.86792	0.0002	0.00208081	yes	2
GRMZM2G158305	10:97643481-97644874	0.0667098	0.953687	3.83754	3.65108	2.20781	0.00225	0.0151796	yes	2
GRMZM2G157822	2:53125292-53132041	0.0366679	0.574077	3.96866	3.64566	0.980603	0.00975	0.0482904	yes	2
GRMZM2G001092	5:182623019-182623370	0.297319	3.81033	3.67983	3.63589	2.88955	0.0001	0.00113386	yes	2
GRMZM5G852116	1:295101659-295102164	1.01689	12.6977	3.64234	3.62935	3.79703	5e-05	0.00060523	yes	2
GRMZM2G329434	6:71031838-71034400	0.0566012	0.812755	3.84392	3.62684	2.22236	5e-05	0.00060523	yes	2
GRMZM2G528742	10:65823207-65823356	0.457491	5.73364	3.64764	3.61895	3.72752	0.0001	0.00113386	yes	2
GRMZM2G303121	1:223881825-223882660	8.18474	100.399	3.61666	3.61505	4.6436	5e-05	0.00060523	yes	2
GRMZM2G156121	9:29168345-29169767	0.0288555	0.464304	4.00815	3.60962	1.64124	0.0002	0.00208081	yes	2
GRMZM2G109420	9:36955769-36961584	0.0477616	0.692661	3.85823	3.60465	1.72248	5e-05	0.00060523	yes	2
XLOC_066658	5:152200487-152200830	0.114617	1.50436	3.71426	3.60314	1.85159	0.00215	0.0146601	yes	2
XLOC_039046	3:25138920-25139115	21.1067	256.588	3.60368	3.60305	3.71721	5e-05	0.00060523	yes	2
GRMZM2G371084	6:149276437-149277728	0.0272544	0.438902	4.00934	3.59092	1.59951	0.0009	0.00729152	yes	2
GRMZM2G524469	8:163057570-163058499	0.0380395	0.56816	3.90072	3.58918	1.45631	0.0023	0.0154499	yes	2
GRMZM2G149410	10:23423084-23427671	0.044698	0.647648	3.85693	3.58776	2.05456	5e-05	0.00060523	yes	2
GRMZM2G020781	2:108160442-108161988	0.0402119	0.592887	3.88206	3.58579	2.08562	5e-05	0.00060523	yes	2
GRMZM2G425430	1:75155614-75179090	0.131069	1.68048	3.68047	3.58296	2.03657	5e-05	0.00060523	yes	2
XLOC_091704	7:135668973-135669303	0.664602	7.99376	3.58831	3.56857	3.11696	5e-05	0.00060523	yes	2
GRMZM2G156261	1:111908815-111910908	0.141956	1.78644	3.65357	3.56342	2.27522	0.00135	0.0101426	yes	2
GRMZM2G062807	10:73465354-73468003	0.235748	2.88895	3.61523	3.56028	2.27628	0.0085	0.0432792	yes	2
GRMZM2G060718	1:248709649-248710468	0.0302071	0.463282	3.93893	3.55718	0.761629	5e-05	0.00060523	yes	2
Cluster_148	3:65923344-65923912	0.328829	3.96593	3.59225	3.55266	2.77416	5e-05	0.00060523	yes	2
AC195316.3_FG006	2:56298320-56298706	0.079767	1.04204	3.70748	3.55086	1.08043	0.0001	0.00113386	yes	2
GRMZM2G590797	10:125658294-125658478	0.19582	2.39821	3.61435	3.54851	1.95046	0.0001	0.00113386	yes	2
XLOC_083763	6:157440929-157441114	0.36683	4.33524	3.56293	3.52745	2.53882	5e-05	0.00060523	yes	2
GRMZM2G124927	8:20562432-20567278	0.414519	4.87136	3.55482	3.52338	3.51054	5e-05	0.00060523	yes	2
AC205484.3_FG005	4:124806078-124815002	0.119577	1.47954	3.62914	3.52299	2.08071	0.0001	0.00113386	yes	2
ClusterV2_5	9:15305923-15308018	0.0593835	0.784783	3.72416	3.5179	2.70365	5e-05	0.00060523	yes	2
GRMZM2G344985	1:75155614-75179090	0.245838	2.90518	3.56284	3.51028	1.71717	0.0004	0.00371968	yes	2
GRMZM2G078667	3:172375175-172375884	0.16082	1.9341	3.58814	3.50855	2.5045	5e-05	0.00060523	yes	2
ClusterV2_53	6:130390413-130392759	0.0723049	0.926484	3.6796	3.5082	2.13367	0.00015	0.00161686	yes	2
GRMZM2G072644	10:71878376-71880068	0.0452156	0.617294	3.77107	3.50599	1.9241	5e-05	0.00060523	yes	2
GRMZM5G859350	9:22056386-22057807	0.456643	5.28661	3.5332	3.50468	3.18935	5e-05	0.00060523	yes	2
GRMZM2G181264_X_1	8:14612140-14613479	0.343736	4.00274	3.54162	3.50384	1.57577	0.0078	0.0404029	yes	2
GRMZM2G000221	7:31098654-31099325	0.537595	6.18418	3.52399	3.49973	3.21152	5e-05	0.00060523	yes	2
GRMZM5G853128	9:2256271-2256598	0.079136	0.996392	3.65431	3.49704	1.27652	5e-05	0.00060523	yes	2
AC202000.4_FG003	10:13635681-13642911	0.127909	1.54666	3.59597	3.49667	0.492675	0.00155	0.0113023	yes	2
GRMZM2G046721	9:146332331-146334342	0.054455	0.714037	3.71286	3.4897	1.76692	0.00025	0.00252206	yes	2
GRMZM2G002720	3:132484841-132486586	0.119111	1.43657	3.59225	3.48595	2.20409	5e-05	0.00060523	yes	2
XLOC_070361	5:43289639-43289916	0.414329	4.7405	3.51619	3.48482	3.40458	0.00085	0.00695162	yes	2
GRMZM2G494038	8:47391421-47391710	0.0584522	0.754835	3.69083	3.48198	0.938745	5e-05	0.00060523	yes	2
GRMZM2G703625	1:67366378-67366744	1.17731	13.2338	3.49065	3.47955	3.10287	5e-05	0.00060523	yes	2
Cluster_312	7:120388266-120390388	0.0845619	1.0433	3.625	3.47751	2.74901	5e-05	0.00060523	yes	2
GRMZM2G546227	1:282140297-282140517	37.63	418.455	3.47512	3.47477	4.31354	5e-05	0.00060523	yes	2
GRMZM2G175541	10:116688769-116692323	0.102838	1.24277	3.59512	3.4728	1.6289	0.0004	0.00371968	yes	2
GRMZM2G169632	10:135534879-135535185	0.102348	1.23589	3.59399	3.47113	1.46738	5e-05	0.00060523	yes	2
XLOC_091703	7:135665339-135666689	0.190818	2.19067	3.5211	3.45398	2.92408	5e-05	0.00060523	yes	2
GRMZM2G701218_X_1	6:155372293-155375814	0.905892	10.0084	3.46573	3.45133	1.77808	0.0039	0.02356	yes	2
AC189077.3_FG002	9:25984998-25985235	0.166931	1.91261	3.51822	3.44181	1.9422	5e-05	0.00060523	yes	2
GRMZM2G514563	2:2408201-2473338	2.61194	28.4252	3.44398	3.43897	1.1238	0.00585	0.0323355	yes	2
XLOC_098569	8:14598782-14599426	0.133825	1.52731	3.51258	3.41802	1.99408	5e-05	0.00060523	yes	2
GRMZM2G050000	8:5644476-5651585	0.0442743	0.569912	3.6862	3.41749	1.08558	0.0026	0.017044	yes	2
Cluster_226	4:232595831-232598155	0.180645	2.02597	3.48739	3.41676	3.57724	5e-05	0.00060523	yes	2
GRMZM2G181266_X_1	8:14599843-14607732	0.191205	2.1261	3.47501	3.40824	1.52294	0.0003	0.00293434	yes	2
GRMZM2G116616	8:103698792-103704249	0.0852692	0.999868	3.55164	3.40601	2.41378	5e-05	0.00060523	yes	2
GRMZM2G411216	1:21899913-21906390	0.422672	4.57302	3.43554	3.40495	3.15416	5e-05	0.00060523	yes	2
GRMZM2G024411	9:146736993-146765545	0.182668	2.0218	3.46834	3.39857	2.83251	5e-05	0.00060523	yes	2
XLOC_016311	1:291165648-291165862	1.11677	11.822	3.40408	3.39243	3.41062	0.00025	0.00252206	yes	2
GRMZM2G542168	4:170677735-170678040	0.0890707	1.02958	3.53096	3.3914	1.31537	5e-05	0.00060523	yes	2
GRMZM2G350471	5:3734287-3761009	0.0560359	0.681624	3.60455	3.38867	0.893357	0.0005	0.00450104	yes	2
GRMZM2G540888	9:52037817-52038042	1.61488	16.993	3.39544	3.38738	3.25654	5e-05	0.00060523	yes	2
lncRNA_Z27kG1_13314	4:164205528-164206749	0.396475	4.23803	3.41809	3.38556	0.958123	0.00615	0.0336067	yes	2
Cluster_139	3:29643218-29644306	0.0945643	1.07929	3.51265	3.38093	2.02153	5e-05	0.00060523	yes	2
XLOC_012299	1:159948416-159949906	0.247465	2.6472	3.41917	3.36746	3.30166	5e-05	0.00060523	yes	2
GRMZM5G875729	2:220743866-220747165	7.97866	82.4118	3.36863	3.367	0.923884	0.0023	0.0154499	yes	2
GRMZM2G108570	9:100536376-100589617	0.128195	1.40732	3.45654	3.35839	1.47866	5e-05	0.00060523	yes	2
XLOC_005730	1:223860363-223860524	2.30542	23.676	3.36032	3.35469	3.87873	0.00015	0.00161686	yes	2
GRMZM2G579382	4:191006001-191007071	0.158609	1.71375	3.43361	3.3538	2.61731	5e-05	0.00060523	yes	2
XLOC_075346	6:21498277-21498433	4.77726	48.8072	3.35284	3.35012	4.58173	5e-05	0.00060523	yes	2
GRMZM5G865804	1:159957695-159959851	0.369558	3.86028	3.38483	3.35005	3.23969	5e-05	0.00060523	yes	2
XLOC_070360	5:43284897-43285219	0.0778478	0.885659	3.50802	3.34987	1.25298	5e-05	0.00060523	yes	2
GRMZM2G059304	1:103395089-103399545	0.0564073	0.664166	3.55759	3.34369	1.84736	5e-05	0.00060523	yes	2
GRMZM2G558887	6:161257776-161257876	0.963794	9.84162	3.3521	3.33867	4.83475	0.00085	0.00695162	yes	2
GRMZM2G002921	10:110976084-110978065	0.149415	1.60142	3.42196	3.33747	2.32499	5e-05	0.00060523	yes	2
XLOC_102531	8:166453061-166454498	0.202455	2.13685	3.39981	3.33699	3.1907	5e-05	0.00060523	yes	2
GRMZM2G495342	9:23410222-23410414	0.165937	1.76327	3.40955	3.33328	1.60765	5e-05	0.00060523	yes	2
GRMZM2G110700	9:70878523-70878915	0.145455	1.55423	3.41755	3.33088	1.85425	0.001	0.00792822	yes	2
GRMZM2G455071	3:82029170-82031551	0.0524023	0.617165	3.55796	3.32917	1.77821	5e-05	0.00060523	yes	2
GRMZM5G837932	9:124845035-124845443	0.109619	1.18812	3.43811	3.32425	1.35332	5e-05	0.00060523	yes	2
GRMZM2G092456	9:154723991-154755677	0.149333	1.56762	3.39197	3.30763	0.229991	0.0003	0.00293434	yes	2
GRMZM2G485905_O_3	10:60805862-60809307	0.0643178	0.725469	3.49562	3.30688	0.691878	0.00075	0.00627367	yes	2
GRMZM2G324221	6:120567523-120572655	0.667091	6.68491	3.32495	3.30564	2.70716	5e-05	0.00060523	yes	2
XLOC_079884	6:11127691-11127773	28.9621	285.423	3.30086	3.30042	36.7359	0.00025	0.00252206	yes	2
XLOC_073543	5:184873588-184873825	0.675239	6.74056	3.3194	3.30033	2.83931	0.00055	0.00487218	yes	2
XLOC_048245	3:182480486-182528725	0.782397	7.79548	3.31667	3.30019	1.76984	0.0033	0.0206609	yes	2
GRMZM5G842306	1:27185668-27189769	0.0741603	0.817296	3.46214	3.29719	1.64806	0.00065	0.00557143	yes	2
GRMZM2G490480	1:282280933-282281153	5.11933	50.0434	3.28915	3.28663	4.52605	5e-05	0.00060523	yes	2
GRMZM2G095894	8:116815470-116820903	0.0915582	0.975586	3.41351	3.27868	1.86853	0.00255	0.0167728	yes	2
GRMZM2G310957	10:139266938-139268827	0.0892469	0.951674	3.41459	3.27645	1.97622	5e-05	0.00060523	yes	2
GRMZM2G444683	7:51431704-51432567	0.0527401	0.595033	3.496	3.26955	1.29292	0.0009	0.00729152	yes	2
XLOC_012295	1:159938341-159938506	3.85127	37.1739	3.27088	3.26753	3.97214	5e-05	0.00060523	yes	2
AC210046.4_FG002	7:148911509-148912569	0.148816	1.5188	3.35133	3.26697	1.93396	5e-05	0.00060523	yes	2
GRMZM2G588812	7:63549047-63549163	8.90828	85.4659	3.26213	3.26068	4.03191	0.0002	0.00208081	yes	2
AC215257.2_FG004	6:90273013-90273355	0.0531554	0.589687	3.47166	3.24723	0.931101	0.0001	0.00112111	yes	2
GRMZM2G047105	9:44129373-44133007	0.400071	3.87944	3.27752	3.24562	2.96003	5e-05	0.00060523	yes	2
GRMZM2G496651	8:121164614-121164801	0.277689	2.69249	3.2774	3.23171	2.28951	5e-05	0.00060523	yes	2
XLOC_039897	3:65914333-65914752	0.156228	1.54881	3.30944	3.22921	1.85965	0.00025	0.00252206	yes	2
GRMZM2G703743	1:128592646-128593554	0.0811474	0.838862	3.36982	3.21926	1.65673	0.00045	0.00410897	yes	2
GRMZM2G118167	1:297135146-297135751	0.100317	1.0148	3.33857	3.21562	1.71114	0.00045	0.00410897	yes	2
GRMZM2G361217	7:165841767-165844716	0.508622	4.80456	3.23974	3.21465	2.45006	5e-05	0.00060523	yes	2
XLOC_064367	5:43299024-43299259	0.368206	3.4905	3.24485	3.21032	2.74822	0.0079	0.0408121	yes	2
GRMZM2G027446	4:155566374-155566529	0.640896	6.00033	3.22688	3.20695	3.35125	0.00035	0.00332877	yes	2
GRMZM2G550852	7:172527562-172527704	0.740278	6.85265	3.21052	3.19327	4.15812	5e-05	0.00060523	yes	2
XLOC_014291	1:230258438-230258688	0.425943	3.9767	3.22284	3.19298	2.52466	0.0033	0.0206609	yes	2
GRMZM2G551256	9:137048190-137053367	0.313593	2.94714	3.23235	3.19195	1.38131	0.00245	0.0162608	yes	2
GRMZM2G358153	4:12097105-12098498	0.0722219	0.73511	3.34745	3.17986	2.08878	5e-05	0.00060523	yes	2
GRMZM2G486037	10:19566435-19566762	0.187958	1.78353	3.24625	3.17954	2.00636	0.00275	0.0178319	yes	2
XLOC_012293	1:159935138-159935305	3.67932	33.372	3.18113	3.17764	3.63311	5e-05	0.00060523	yes	2
XLOC_006986	1:262510923-262511037	17.7198	159.939	3.17409	3.17336	3.98392	5e-05	0.00060523	yes	2
GRMZM2G528850	9:19815853-19816193	0.0612018	0.632008	3.3683	3.17261	1.00809	5e-05	0.00060523	yes	2
GRMZM2G330377	2:73637395-73649625	0.142072	1.36107	3.26005	3.17248	3.14864	5e-05	0.00060523	yes	2
AC177837.3_FG007	1:22625945-22626350	0.348379	3.21322	3.20529	3.16894	2.67555	5e-05	0.00060523	yes	2
GRMZM2G096680	6:39431500-39432324	0.0731705	0.736548	3.33144	3.16609	1.16864	0.00515	0.0293595	yes	2
GRMZM2G331880	2:81770478-81772219	0.121023	1.16141	3.26253	3.16035	2.01103	5e-05	0.00060523	yes	2
GRMZM5G876675	9:96900840-96901204	0.266343	2.45976	3.20716	3.15984	2.25134	5e-05	0.00060523	yes	2
GRMZM5G871264	10:136917128-136919678	3.82217	34.1629	3.15997	3.15662	4.78805	5e-05	0.00060523	yes	2
XLOC_080306	6:29812855-29813051	0.655812	5.92146	3.1746	3.1552	3.57332	0.00065	0.00558497	yes	2
Cluster_338	8:166449424-166450624	0.145001	1.37051	3.24058	3.15485	2.47997	5e-05	0.00060523	yes	2
XLOC_054368	4:176767307-176767501	0.747701	6.72323	3.16862	3.1516	3.69931	0.0053	0.0300166	yes	2
XLOC_000795	1:21899913-21906390	0.299206	2.72872	3.18901	3.14686	1.7518	0.00025	0.00252206	yes	2
GRMZM2G349791	4:1299465-1300872	0.192721	1.77614	3.20415	3.13928	1.07724	0.00595	0.0327811	yes	2
XLOC_011418	1:111067622-111068255	0.072431	0.71569	3.30465	3.13809	1.81417	0.00085	0.00695162	yes	2
XLOC_086559	7:108985983-108986227	0.5374	4.7894	3.15578	3.13219	3.19272	0.0018	0.0126944	yes	2
GRMZM2G058862	2:189111230-189113039	0.634958	5.63024	3.14846	3.12848	2.92653	5e-05	0.00060523	yes	2
AC190975.3_FG004	1:8204211-8205528	0.721449	6.35488	3.13889	3.1213	2.29424	5e-05	0.00060523	yes	2
AC214484.3_FG001	5:29990675-29993197	0.171781	1.57113	3.19316	3.12068	1.77043	5e-05	0.00060523	yes	2
XLOC_062154	4:226041014-226042475	0.266172	2.38965	3.16637	3.11919	2.14232	0.00255	0.0167728	yes	2
XLOC_067541	5:183562616-183562711	18.1099	156.82	3.11426	3.11355	11.2407	0.00015	0.00161686	yes	2
GRMZM2G402881	10:60750334-60753373	0.08583	0.819126	3.25453	3.11304	1.72736	5e-05	0.00060523	yes	2
GRMZM2G061393	1:169222683-169224501	0.081893	0.780098	3.25184	3.104	1.4408	0.00075	0.00627367	yes	2
GRMZM2G566307	10:97953333-97954011	0.0791683	0.754647	3.25281	3.10019	1.53168	0.00055	0.00487218	yes	2
GRMZM2G355358	1:22619765-22625204	0.538969	4.62805	3.10213	3.07872	3.87088	5e-05	0.00060523	yes	2
Cluster_266	6:21501951-21502934	0.0826437	0.77217	3.22394	3.07772	1.788	0.00015	0.00161686	yes	2
GRMZM2G525319	2:4825902-4826011	1.04159	8.85577	3.08783	3.07567	5.21976	0.00065	0.00557143	yes	2
GRMZM2G557616	9:146092697-146093055	0.0769824	0.723306	3.23201	3.07562	1.09047	0.00065	0.00557143	yes	2
GRMZM2G135068	4:52352416-52358005	0.0676481	0.644367	3.25176	3.07508	1.20289	0.0013	0.00982964	yes	2
GRMZM2G145638	6:129225096-129226772	0.0927228	0.853675	3.20269	3.07173	1.99296	0.0001	0.00113386	yes	2
GRMZM2G493133	4:10348734-10349319	0.155013	1.37253	3.14637	3.06666	1.86104	5e-05	0.00060523	yes	2
GRMZM2G036759	9:75081780-75089006	0.119584	1.06796	3.15877	3.05634	2.33207	5e-05	0.00060523	yes	2
GRMZM2G167698	1:60969021-60972506	0.0489916	0.480515	3.29397	3.05572	2.07807	5e-05	0.00060523	yes	2
XLOC_057706	4:39677148-39679139	0.5979	5.03221	3.07322	3.05215	2.66919	5e-05	0.00060523	yes	2
GRMZM2G314926	6:148377960-148378131	0.942035	7.86336	3.06129	3.04789	2.43951	0.00705	0.0372829	yes	2
XLOC_096732	8:143162337-143162631	0.32573	2.76452	3.08528	3.04686	2.08557	0.00085	0.00695162	yes	2
GRMZM2G472087	9:110875570-110877812	0.278455	2.36196	3.08447	3.03966	2.50249	5e-05	0.00060523	yes	2
GRMZM2G110366	1:39892693-39893206	0.0953935	0.855571	3.16492	3.03787	1.64239	0.0016	0.0115865	yes	2
GRMZM2G392513	10:11408728-11421794	1.04574	8.65941	3.04974	3.03768	3.3914	5e-05	0.00060523	yes	2
GRMZM2G329252	2:13107178-13107741	0.098284	0.878425	3.15989	3.03643	1.52183	0.0005	0.00450104	yes	2
Cluster_26	1:159939860-159940224	0.708401	5.86076	3.04845	3.03069	2.41589	5e-05	0.00060523	yes	2
GRMZM2G050625	8:96786197-96788214	0.14578	1.25931	3.11076	3.02646	2.82727	5e-05	0.00060523	yes	2
Cluster_244	5:84134693-84136828	0.0954577	0.849165	3.15311	3.02627	2.63567	5e-05	0.00060523	yes	2
GRMZM2G121220	5:101338325-101341265	0.0699724	0.639599	3.19231	3.02198	2.22548	5e-05	0.00060523	yes	2
XLOC_079885	6:11200087-11200221	13.0528	106.042	3.02221	3.02124	3.80208	5e-05	0.00060523	yes	2
GRMZM2G179356	9:23620568-23621930	0.0866282	0.773425	3.15835	3.01928	1.41289	0.00015	0.00161686	yes	2
GRMZM2G073540	5:48865286-48866779	0.160415	1.3709	3.09523	3.01848	2.87653	5e-05	0.00060523	yes	2
XLOC_052926	4:126389338-126389523	2.25169	18.314	3.02386	3.01826	3.48163	0.00025	0.00252206	yes	2
XLOC_017346	10:23199497-23199595	38.4791	311.712	3.01807	3.01774	3.8903	5e-05	0.00060523	yes	2
GRMZM2G573252	7:86824701-86824799	11.259	91.0062	3.01488	3.01376	10.5143	0.00295	0.0188645	yes	2
GRMZM2G172794	1:91711139-91725839	0.051352	0.483476	3.23495	3.0078	1.03022	0.0031	0.0196044	yes	2
GRMZM2G133721	10:111875540-111880989	0.772502	6.27126	3.02115	3.00489	2.89985	5e-05	0.00060523	yes	2
GRMZM2G050748	6:116133066-116134656	0.225492	1.87588	3.05642	3.00149	3.30449	5e-05	0.00060523	yes	2
GRMZM2G043565	4:232592186-232595673	0.633126	5.11743	3.01486	2.99506	2.17645	5e-05	0.00060523	yes	2
GRMZM2G098739	4:170671595-170673754	1.44371	11.493	2.9929	2.9842	3.42194	5e-05	0.00060523	yes	2
GRMZM2G174653	1:162507399-162507974	0.0538225	0.494727	3.20035	2.98337	1.34805	0.00185	0.0129764	yes	2
GRMZM2G010636	5:48243630-48248608	1.76292	14.0036	2.98976	2.98263	4.33139	5e-05	0.00060523	yes	2
AC211913.3_FG001	7:135658156-135658875	0.126489	1.06881	3.07892	2.98258	1.42012	0.00055	0.00487218	yes	2
GRMZM2G337905	6:3437685-3459929	0.223792	1.82742	3.02957	2.97438	1.96151	0.00775	0.0402028	yes	2
Cluster_317	7:176262657-176263503	0.121053	1.01871	3.07304	2.97261	1.84526	5e-05	0.00060523	yes	2
XLOC_017347	10:23200649-23201107	0.352701	2.83413	3.00639	2.97113	2.12306	5e-05	0.00060523	yes	2
GRMZM2G522185_O_1	6:155142941-155145376	0.653294	5.18533	2.98863	2.9695	1.74573	0.0072	0.0379009	yes	2
GRMZM2G704417	7:21556564-21557476	0.316532	2.5473	3.00855	2.96933	1.89373	0.00095	0.00761724	yes	2
XLOC_096731	8:143159288-143159424	7.51572	58.8493	2.96904	2.96737	3.75242	5e-05	0.00060523	yes	2
AC205886.3_FG001	6:90970321-90979118	0.880807	6.86651	2.96268	2.94849	3.03576	5e-05	0.00060523	yes	2
AC204940.3_FG007	10:39143134-39144866	0.146776	1.19666	3.02733	2.94424	2.10018	5e-05	0.00060523	yes	2
XLOC_084224	6:168003383-168003608	0.218835	1.74878	2.99843	2.9422	1.87282	0.0003	0.00293434	yes	2
GRMZM2G429982	3:181331051-181332269	1.29116	9.97879	2.95019	2.94051	4.2146	5e-05	0.00060523	yes	2
XLOC_038169	3:555738-556151	0.174289	1.40235	3.0083	2.93806	1.75461	0.0006	0.00522113	yes	2
GRMZM2G117971	4:9685549-9686426	0.14736	1.19593	3.02072	2.93801	1.69895	0.00415	0.0247967	yes	2
GRMZM2G101928	10:4160264-4165105	0.491654	3.83227	2.96248	2.93719	2.71175	5e-05	0.00060523	yes	2
siRNA_Z27kG1_19135	5:2797325-2803948	1.61626	12.436	2.9438	2.93605	2.76083	5e-05	0.00060523	yes	2
GRMZM2G125032	3:151858688-151860775	1.80277	13.8288	2.93939	2.93245	3.89016	5e-05	0.00060523	yes	2
GRMZM2G013264	10:130257335-130263288	0.100339	0.826805	3.04267	2.92295	2.23095	0.0001	0.00113386	yes	2
Cluster_301	7:35296773-35298257	0.252114	1.96934	2.96557	2.91675	2.88445	5e-05	0.00060523	yes	2
GRMZM2G017809	3:64705577-64706318	0.499187	3.8311	2.94011	2.91525	2.38826	5e-05	0.00060523	yes	2
GRMZM2G491891	4:77698002-77698107	1.93105	14.5977	2.91828	2.91182	7.96006	0.00025	0.00252206	yes	2
GRMZM5G863076	2:157667469-157669682	0.286501	2.21686	2.95191	2.9089	2.24893	5e-05	0.00060523	yes	2
GRMZM2G582555	2:179074773-179079236	0.100911	0.818239	3.01943	2.90064	1.52693	0.00065	0.00557143	yes	2
GRMZM2G002656	6:129006367-129016784	0.120727	0.96368	2.9968	2.89689	3.78641	5e-05	0.00060523	yes	2
GRMZM2G044700	8:6515025-6517138	0.102065	0.822543	3.0106	2.89319	1.85329	5e-05	0.00060523	yes	2
GRMZM5G814022	6:95014272-95014928	0.0955404	0.773792	3.01776	2.89268	1.68732	5e-05	0.00060523	yes	2
GRMZM2G556672	5:187406861-187407213	0.274008	2.08911	2.93059	2.88577	1.80851	5e-05	0.00060523	yes	2
GRMZM2G538845	6:100046152-100046512	0.0624938	0.52527	3.07127	2.88434	0.98958	0.0002	0.00208081	yes	2
GRMZM2G090872	2:11827230-11830397	0.127666	0.99796	2.9666	2.87219	1.82359	5e-05	0.00060523	yes	2
GRMZM2G702455	4:60547441-60548068	0.24484	1.84663	2.91499	2.86502	1.57881	0.00115	0.00890855	yes	2
XLOC_011642	1:121298004-121298527	0.472723	3.49897	2.88786	2.86178	2.37489	5e-05	0.00060523	yes	2
GRMZM2G485194	4:60586684-60587043	0.141075	1.08701	2.94584	2.86024	1.67196	0.00855	0.0434655	yes	2
GRMZM2G157505	7:164496100-164496944	2.66777	19.4175	2.86365	2.859	3.8163	5e-05	0.00060523	yes	2
XLOC_034775	2:127117881-127118104	0.704248	5.16525	2.87468	2.85713	2.56217	0.0028	0.0181078	yes	2
GRMZM2G580206	3:114061741-114062108	0.138131	1.06281	2.94378	2.85645	1.73161	0.00245	0.0162608	yes	2
GRMZM5G836153	3:227316482-227316662	1.18583	8.64278	2.8656	2.85515	2.66788	0.0022	0.0149147	yes	2
Cluster_251	5:152195239-152196281	0.111317	0.861529	2.95223	2.84477	2.03606	5e-05	0.00060523	yes	2
GRMZM2G512893	1:132682220-132682957	0.0745544	0.597154	3.00174	2.84411	1.45583	0.0008	0.00661365	yes	2
Cluster_166	3:182480486-182528725	0.107415	0.830705	2.95114	2.83998	1.91655	5e-05	0.00060523	yes	2
GRMZM2G412436	5:142442259-142444173	0.0859941	0.675954	2.97461	2.83709	2.66086	5e-05	0.00060523	yes	2
XLOC_111737	9:153930793-153931028	5.90327	42.1726	2.83672	2.83462	3.292	5e-05	0.00060523	yes	2
XLOC_087097	7:129305741-129307485	2.45396	17.5411	2.83756	2.83251	4.19483	5e-05	0.00060523	yes	2
GRMZM2G703755	1:141758957-141759787	0.328268	2.39749	2.86858	2.83129	2.51939	5e-05	0.00060523	yes	2
GRMZM2G700785	8:167381694-167382096	40.3852	287.338	2.83085	2.83054	4.54426	5e-05	0.00060523	yes	2
GRMZM2G140793	6:155833823-155835567	0.0636375	0.51197	3.00811	2.82545	1.97217	5e-05	0.00060523	yes	2
AF466202.2_FG001	10:138456051-138460451	0.43328	3.13075	2.85313	2.82482	2.79127	5e-05	0.00060523	yes	2
GRMZM2G344513	1:84327029-84330454	0.0831246	0.643977	2.95366	2.81201	1.60536	0.0002	0.00208081	yes	2
GRMZM2G022972	8:12935680-12938267	0.337218	2.42482	2.84612	2.8099	2.87999	5e-05	0.00060523	yes	2
GRMZM5G871182	5:43285275-43285548	0.353083	2.52849	2.8402	2.8056	2.34876	0.00275	0.0178319	yes	2
GRMZM2G017966	6:40366468-40368354	2.2893	16.0577	2.81029	2.8049	4.13013	5e-05	0.00060523	yes	2
GRMZM2G365544	1:26765813-26770834	0.254922	1.83779	2.84984	2.80216	3.049	5e-05	0.00060523	yes	2
XLOC_073457	5:182119366-182119442	19.3412	134.885	2.80198	2.80134	24.7589	0.00385	0.023305	yes	2
GRMZM2G023068	1:175318984-175320971	0.208838	1.50412	2.84846	2.79054	1.77777	5e-05	0.00060523	yes	2
GRMZM2G417306	7:141987736-141989722	0.182516	1.31796	2.85222	2.78616	2.53224	5e-05	0.00060523	yes	2
GRMZM2G114468	4:200513266-200514631	0.173288	1.25284	2.85396	2.78449	1.85722	0.0022	0.0149147	yes	2
GRMZM2G518692	4:141548092-141555023	0.39799	2.78159	2.80511	2.77448	1.21005	0.00205	0.0140845	yes	2
GRMZM2G177215	9:11745381-11745684	0.355505	2.48438	2.80495	2.77072	1.73238	0.002	0.0138093	yes	2
GRMZM2G358070	3:138125388-138133591	5.11318	34.9253	2.77198	2.76957	1.02312	0.0036	0.0221223	yes	2
GRMZM2G012160	8:170965229-170968006	8.83911	60.1671	2.767	2.76561	4.05685	5e-05	0.00060523	yes	2
GRMZM2G565856	10:146844787-146850597	0.0541653	0.425828	2.97483	2.76389	1.8873	5e-05	0.00060523	yes	2
GRMZM2G565742	5:36335597-36335932	0.0826914	0.619271	2.90476	2.76317	1.0625	0.00065	0.00558497	yes	2
XLOC_087098	7:129308162-129308332	1.97925	13.4258	2.76199	2.75579	2.56555	0.00125	0.00950704	yes	2
GRMZM2G404530	4:33156954-33157236	0.10472	0.7644	2.86779	2.75496	1.13602	0.0001	0.00113386	yes	2
XLOC_002540	1:83072111-83072256	1.1351	7.70344	2.76269	2.7519	5.03589	0.00075	0.00627367	yes	2
GRMZM5G858491	4:225601295-225601481	0.348301	2.40353	2.78675	2.7519	2.40219	0.0001	0.00113386	yes	2
GRMZM2G076651	8:167209871-167211341	0.0666542	0.506253	2.92509	2.75164	1.50965	0.0002	0.00208081	yes	2
GRMZM2G312165	1:239456723-239467310	0.0951264	0.697142	2.87353	2.74987	1.42974	5e-05	0.00060523	yes	2
GRMZM2G361791	10:12746035-12747085	0.892225	6.05474	2.76258	2.74889	2.12773	5e-05	0.00060523	yes	2
Cluster_250	5:152192952-152193539	0.223654	1.55259	2.79533	2.74149	2.03248	5e-05	0.00060523	yes	2
GRMZM2G431039	7:155109171-155111913	0.31397	2.14134	2.76982	2.7313	2.12693	5e-05	0.00060523	yes	2
GRMZM2G458878	10:60652523-60653763	0.104412	0.7461	2.83709	2.72434	1.69275	5e-05	0.00060523	yes	2
GRMZM2G395768	8:138671525-138675280	0.161414	1.12274	2.79818	2.72426	2.1395	0.01005	0.0493551	yes	2
GRMZM2G701343	5:10913296-10914069	0.148759	1.03737	2.80189	2.72186	1.73769	5e-05	0.00060523	yes	2
AC198787.3_FG009	10:85713004-85713729	0.0718468	0.529748	2.88231	2.72129	1.23792	0.0098	0.048464	yes	2
XLOC_015904	1:280090360-280090478	11.9812	78.9138	2.7195	2.71848	5.39237	5e-05	0.00060523	yes	2
GRMZM2G090710	6:92551083-92554224	0.0635196	0.47343	2.89788	2.71711	1.35329	0.0013	0.00982964	yes	2
Cluster_154	3:123023953-123024783	0.110072	0.779251	2.82365	2.71658	1.69147	5e-05	0.00060523	yes	2
GRMZM2G045098	1:223371157-223371891	0.0714554	0.523916	2.87422	2.71253	1.3808	0.0012	0.00921509	yes	2
GRMZM2G448957	1:150435219-150440389	0.0963939	0.685357	2.82984	2.70834	2.0786	5e-05	0.00060523	yes	2
GRMZM2G308951	3:8574716-8599981	0.233332	1.57578	2.75561	2.70419	0.595141	0.001	0.00792822	yes	2
GRMZM2G485905_O_1	10:60805862-60809307	0.0695275	0.506777	2.8657	2.70002	1.0213	0.00015	0.00161686	yes	2
GRMZM2G172795	2:19041696-19046154	0.0631079	0.463504	2.87669	2.69528	2.14587	5e-05	0.00060523	yes	2
XLOC_066651	5:152191606-152192040	0.261118	1.74319	2.73895	2.69299	2.11905	0.0001	0.00113386	yes	2
GRMZM2G077256	2:220743866-220747165	6.5956	42.6441	2.69277	2.69092	3.92255	5e-05	0.00060523	yes	2
Cluster_66	10:23130542-23131475	0.384717	2.53385	2.71946	2.68812	2.64591	5e-05	0.00060523	yes	2
AC177905.2_FG003	1:115623998-115624783	0.12715	0.870173	2.77477	2.68203	1.27975	0.0075	0.0392622	yes	2
GRMZM2G486618	2:139808208-139808835	0.0833053	0.587568	2.81828	2.67907	1.23763	0.00095	0.00761724	yes	2
GRMZM2G075641_O_1	8:41352042-41372354	0.0579924	0.425046	2.87368	2.67772	0.76839	0.00365	0.0223624	yes	2
GRMZM2G145933	4:29781654-29782331	0.117523	0.803654	2.77363	2.67366	1.57446	0.00015	0.00161686	yes	2
XLOC_062180	4:226799496-226799642	8.9435	57.1109	2.67485	2.6735	3.39936	5e-05	0.00060523	yes	2
GRMZM5G818542	1:163667698-163668149	0.729158	4.697	2.68744	2.67085	3.30666	0.0087	0.0440667	yes	2
XLOC_050884	4:25243001-25243268	0.302292	1.97629	2.70878	2.66911	2.00255	0.00515	0.0293595	yes	2
GRMZM2G360541	9:101949824-101954589	0.193027	1.27334	2.72175	2.66016	1.91755	5e-05	0.00060523	yes	2
GRMZM5G840265	5:47148460-47149102	0.2057	1.34403	2.70795	2.65016	1.84647	5e-05	0.00060523	yes	2
AC214505.3_FG004	10:52668129-52668363	1.52296	9.5551	2.6494	2.64146	2.42849	0.00415	0.0247586	yes	2
GRMZM5G888999	8:41352042-41372354	0.0699952	0.48688	2.79824	2.63491	0.986498	0.00985	0.0485507	yes	2
Cluster_205	4:134360289-134361096	0.2543	1.63148	2.68157	2.63475	2.04407	5e-05	0.00060523	yes	2
GRMZM2G091980	8:114818729-114820923	0.190106	1.23169	2.69576	2.63347	2.50267	5e-05	0.00060523	yes	2
GRMZM2G172897	5:184744703-184744967	0.753366	4.72312	2.64832	2.63234	2.78308	0.0001	0.00113386	yes	2
GRMZM2G068154	1:52321676-52322607	0.084969	0.575986	2.76103	2.62534	1.35155	0.0006	0.00522113	yes	2
GRMZM2G027569	10:27436925-27437525	0.846173	5.26464	2.63731	2.6231	2.59923	0.00345	0.0214138	yes	2
GRMZM5G866269	3:151490190-151491123	0.509713	3.18394	2.64306	2.61955	2.74081	5e-05	0.00060523	yes	2
AC203396.3_FG003	6:19975264-19986820	0.196273	1.25725	2.67934	2.61907	1.92183	0.00105	0.00826062	yes	2
GRMZM2G525881	2:112807425-112807727	3.29969	20.3231	2.62271	2.61906	4.15409	0.0013	0.00982964	yes	2
XLOC_111703	9:153427040-153427427	0.735761	4.5674	2.63406	2.61774	2.13068	0.0018	0.0126944	yes	2
GRMZM2G443514	10:113178512-113179459	0.117371	0.771481	2.71656	2.61717	1.49647	0.00445	0.0261749	yes	2
GRMZM2G179268	2:41121574-41124572	0.610201	3.7942	2.63644	2.61679	1.8365	5e-05	0.00060523	yes	2
XLOC_049441	3:216620833-216621127	0.371983	2.32626	2.6447	2.61262	1.73984	0.0018	0.0126944	yes	2
GRMZM2G071771	2:10831178-10831910	1.67654	10.2995	2.61902	2.61184	3.01447	5e-05	0.00060523	yes	2
AC200119.4_FG001	5:109922958-109923369	0.106273	0.700207	2.72001	2.61072	1.3399	0.0051	0.0291386	yes	2
GRMZM2G003576	1:72147926-72150940	0.100042	0.660125	2.72214	2.60638	1.84688	5e-05	0.00060523	yes	2
GRMZM2G420544	3:40920287-40921240	0.129792	0.84067	2.69533	2.60532	2.00351	5e-05	0.00060523	yes	2
GRMZM2G108949	1:229420283-229421257	0.344709	2.14514	2.63762	2.60307	2.52735	5e-05	0.00060523	yes	2
GRMZM2G095792	2:12571385-12571833	0.361751	2.24714	2.63502	2.60209	1.80336	5e-05	0.00060523	yes	2
GRMZM2G010791	10:97464956-97466006	12.6642	76.793	2.60022	2.59927	3.75635	5e-05	0.00060523	yes	2
GRMZM2G146705	7:160657667-160658195	0.686688	4.20591	2.61469	2.59726	2.00284	5e-05	0.00060523	yes	2
GRMZM5G894709	1:40968235-40971651	0.240029	1.49935	2.64306	2.59376	1.83946	0.0003	0.00293434	yes	2
XLOC_075141	6:12955961-12956105	2.91664	17.594	2.59271	2.58859	4.41001	0.0043	0.0254543	yes	2
XLOC_096735	8:143170221-143170309	39.3585	236.779	2.58879	2.58849	3.4626	0.00045	0.00410897	yes	2
XLOC_070236	5:37722089-37722407	0.388338	2.37629	2.61333	2.5827	1.80047	0.00025	0.00252206	yes	2
XLOC_017348	10:23208376-23208565	0.90192	5.45243	2.59583	2.58256	3.16571	0.0075	0.0392622	yes	2
GRMZM2G590175	10:42227950-42235889	1.48836	8.96235	2.59016	2.5821	2.66952	5e-05	0.00060523	yes	2
AC185468.3_FG002	5:197228378-197228570	1.29101	7.7792	2.59112	2.58184	3.4679	0.0023	0.0154499	yes	2
GRMZM2G479245	9:147736550-147737374	0.376058	2.30072	2.61306	2.58145	2.18684	5e-05	0.00060523	yes	2
GRMZM2G177237	9:30239201-30245190	0.161336	1.01449	2.6526	2.58001	1.70697	5e-05	0.00060523	yes	2
GRMZM2G436295	3:181619314-181620140	0.166365	1.04049	2.64484	2.57443	1.71531	5e-05	0.00060523	yes	2
GRMZM5G870829	1:285387066-285387692	0.162652	1.01638	2.64358	2.57163	1.6514	0.00175	0.0124229	yes	2
GRMZM2G405307	6:21504123-21505007	0.155688	0.974124	2.64545	2.57037	1.86342	5e-05	0.00060523	yes	2
GRMZM2G359786	9:155742060-155742761	0.329015	1.99643	2.6012	2.56521	1.96913	5e-05	0.00060523	yes	2
AC216891.3_FG004	3:22683242-22686671	0.842115	5.03288	2.57929	2.56513	1.26718	0.0002	0.00208081	yes	2
XLOC_066083	5:126706395-126706659	1.67242	9.93656	2.57081	2.56366	2.22114	5e-05	0.00060523	yes	2
XLOC_091618	7:132846419-132846629	0.787825	4.69985	2.57667	2.56154	2.37296	0.00065	0.00557143	yes	2
GRMZM5G886354	1:5495637-5495965	1.27263	7.55543	2.56971	2.56032	2.70733	0.00395	0.0237955	yes	2
XLOC_059444	4:132517290-132517491	3.70606	21.8525	2.55984	2.55661	2.76104	5e-05	0.00060523	yes	2
GRMZM2G399794	5:154684998-154685173	4.33313	25.5346	2.55898	2.55621	3.30989	5e-05	0.00060523	yes	2
GRMZM2G025568	10:45493658-45494825	0.260159	1.57876	2.60133	2.55602	1.69768	0.0006	0.00522113	yes	2
GRMZM5G845062	5:9617867-9618687	0.103702	0.658615	2.66699	2.55592	1.6211	5e-05	0.00060523	yes	2
GRMZM2G032339	1:277217975-277298972	1.90826	11.2421	2.55859	2.55232	3.11203	5e-05	0.00060523	yes	2
XLOC_012301	1:159955074-159955204	5.6196	32.914	2.55016	2.54804	5.03946	0.0019	0.0132696	yes	2
GRMZM2G027595	1:56598854-56606593	0.0645964	0.425468	2.71953	2.54539	1.4792	5e-05	0.00060523	yes	2
GRMZM2G356897	10:64376216-64381972	0.131119	0.812488	2.63147	2.54308	2.22283	5e-05	0.00060523	yes	2
GRMZM2G485630_X_1	7:145794444-145796093	1.01366	5.91398	2.54455	2.53283	2.52843	5e-05	0.00060523	yes	2
GRMZM2G010768	9:23074206-23075360	0.105546	0.657783	2.63974	2.53091	1.67591	5e-05	0.00060523	yes	2
GRMZM2G065862	1:160685821-160686323	0.0868192	0.548376	2.65908	2.52787	1.30903	0.00315	0.0198689	yes	2
GRMZM2G163374	5:26381133-26382243	0.10554	0.654172	2.63188	2.52316	1.72131	0.00055	0.00487218	yes	2
GRMZM2G320733	1:153347729-153350809	0.0693875	0.445117	2.68144	2.51925	1.68096	5e-05	0.00060523	yes	2
GRMZM2G173124	8:20630901-20676836	0.101978	0.63184	2.6313	2.519	0.62847	0.0002	0.00208081	yes	2
GRMZM2G127418	2:144827058-144828816	0.0928381	0.578261	2.63893	2.51608	2.00421	5e-05	0.00060523	yes	2
AC191575.2_FG001	1:295351658-295380113	0.101026	0.624377	2.62769	2.51444	1.89042	5e-05	0.00060523	yes	2
XLOC_089736	7:35293084-35293594	0.281773	1.65679	2.55578	2.51415	1.80626	0.00015	0.00161686	yes	2
GRMZM2G541439	1:122571702-122571803	10.0209	57.2492	2.51424	2.51306	7.62438	0.00905	0.0454605	yes	2
GRMZM2G512889	1:132679282-132679738	0.706731	4.07999	2.52933	2.51259	2.11992	5e-05	0.00060523	yes	2
GRMZM2G178476	5:36516323-36516509	0.367409	2.13746	2.54044	2.50843	1.88361	0.0008	0.00661365	yes	2
AC216891.3_FG004_X_1	3:22683242-22686671	1.82288	10.403	2.5127	2.5062	3.43219	5e-05	0.00060523	yes	2
GRMZM2G343937	6:116386491-116387670	0.23081	1.35314	2.55153	2.50097	2.07062	5e-05	0.00060523	yes	2
XLOC_044318	3:7211071-7211232	3.42181	19.408	2.50382	2.50035	5.72826	0.0016	0.0115865	yes	2
XLOC_059938	4:153644181-153644479	0.472055	2.71607	2.52449	2.49955	1.75479	0.00015	0.00161686	yes	2
GRMZM2G443927	7:130142081-130145188	0.181759	1.07115	2.55905	2.4952	2.05752	5e-05	0.00060523	yes	2
GRMZM2G096662	6:137030516-137032690	0.288793	1.66548	2.52783	2.48736	2.30988	5e-05	0.00060523	yes	2
GRMZM2G702146	3:202849020-202849676	0.0920326	0.562031	2.61043	2.48706	1.39044	0.00055	0.00487218	yes	2
XLOC_002038	1:64183020-64186312	0.317343	1.82417	2.52313	2.48625	1.93225	0.00045	0.00410897	yes	2
GRMZM2G484436	2:47632759-47634609	0.589822	3.35049	2.50602	2.48607	1.69433	0.0035	0.0216516	yes	2
ClusterV2_17	9:15302238-15303968	0.0993818	0.60233	2.5995	2.48494	1.98849	5e-05	0.00060523	yes	2
GRMZM2G565284	1:282204801-282205020	0.73221	4.14271	2.50024	2.48415	2.6723	0.0056	0.0313052	yes	2
GRMZM5G837563	4:1299465-1300872	6.95795	38.7486	2.47741	2.47571	3.97226	5e-05	0.00060523	yes	2
GRMZM2G056377	1:8087579-8090320	0.133675	0.78817	2.55978	2.47389	1.79493	5e-05	0.00060523	yes	2
GRMZM2G156982	1:48347991-48348247	0.477762	2.69042	2.49347	2.46893	1.83254	0.00195	0.0135313	yes	2
GRMZM2G456241	9:149570696-149575220	0.310132	1.76136	2.50574	2.46812	2.42629	5e-05	0.00060523	yes	2
GRMZM2G443833	10:143869095-143869400	5.45316	30.2029	2.46952	2.46736	2.22054	5e-05	0.00060523	yes	2
GRMZM2G110321	1:248182312-248200313	1.37808	7.63295	2.46959	2.46104	1.54687	5e-05	0.00060523	yes	2
GRMZM2G156207	4:37991750-37997482	0.0844737	0.510178	2.59443	2.46102	1.10798	0.00095	0.00761724	yes	2
GRMZM2G505348	1:43134261-43134384	1.12742	6.24556	2.46981	2.45937	4.85108	0.003	0.019115	yes	2
Cluster_91	2:46228852-46229744	0.261716	1.48418	2.50359	2.45918	2.06028	5e-05	0.00060523	yes	2
GRMZM2G134711	7:149982422-149984776	2.18706	12.0697	2.46432	2.45894	3.33878	5e-05	0.00060523	yes	2
GRMZM2G153623	10:111474484-111474904	0.098156	0.578553	2.5593	2.44406	1.16529	0.0069	0.0367899	yes	2
GRMZM2G070685	1:130692001-130706245	9.03344	49.1523	2.44391	2.44261	3.44788	5e-05	0.00060523	yes	2
AC191654.3_FG004	2:16367029-16367536	0.077581	0.465958	2.58642	2.44214	1.23138	0.0036	0.0221223	yes	2
GRMZM2G153510	6:148123618-148124286	0.0755201	0.453438	2.58597	2.43804	1.15737	0.00215	0.0146447	yes	2
GRMZM2G465678	1:5245179-5245999	0.34074	1.88824	2.4703	2.43619	2.31975	5e-05	0.00060523	yes	2
GRMZM2G491614	3:176219112-176219475	0.194531	1.09318	2.49047	2.43128	1.72201	0.00875	0.0442738	yes	2
GRMZM2G444178	1:66289468-66291166	0.205804	1.1524	2.4853	2.42931	1.33859	5e-05	0.00060523	yes	2
GRMZM2G072621	10:71876177-71877289	3.40825	18.3067	2.42527	2.42183	1.43175	5e-05	0.00060523	yes	2
GRMZM5G885292	8:90620487-90621097	0.0856356	0.500911	2.54827	2.41745	1.11221	0.00335	0.0209234	yes	2
GRMZM2G158742	3:172184381-172186116	0.418591	2.27918	2.4449	2.41716	2.59218	5e-05	0.00060523	yes	2
GRMZM2G494777	5:4743481-4743846	0.181257	1.00942	2.47742	2.41416	1.23554	0.0035	0.0216516	yes	2
GRMZM2G336886	4:232843892-232849113	0.134814	0.752704	2.48111	2.39692	0.644448	0.0036	0.0221223	yes	2
XLOC_085985	7:81098920-81099628	0.637855	3.39997	2.41422	2.39602	2.37559	5e-05	0.00060523	yes	2
GRMZM2G522194	6:155142941-155145376	1.78967	9.45536	2.40144	2.39492	1.71947	0.00285	0.0183639	yes	2
GRMZM2G174147	2:126820461-126825255	1.56783	8.24433	2.39464	2.38721	2.87856	5e-05	0.00060523	yes	2
GRMZM2G096381	8:164897698-164897856	11.1589	58.3092	2.38552	2.38448	2.40401	5e-05	0.00060523	yes	2
GRMZM2G407382	1:158772732-158773729	0.196192	1.05405	2.42561	2.36751	1.61761	5e-05	0.00060523	yes	2
GRMZM2G333361	4:158480937-158487804	0.103212	0.573928	2.47525	2.36676	2.04197	5e-05	0.00060523	yes	2
GRMZM2G514005	6:52585232-52586100	24.4962	126.14	2.36439	2.36392	2.85334	5e-05	0.00060523	yes	2
siRNA_Z27kG1_02429	1:86270164-86271419	0.201197	1.07183	2.41339	2.35681	1.29277	5e-05	0.00060523	yes	2
GRMZM2G006424	7:29187838-29189361	0.119505	0.653225	2.4505	2.35649	1.80252	5e-05	0.00060523	yes	2
XLOC_040812	3:122996723-122997042	0.96332	4.9745	2.36846	2.35646	1.68373	5e-05	0.00060523	yes	2
GRMZM2G116966	9:2118349-2121095	10.1621	51.994	2.35515	2.35401	3.554	5e-05	0.00060523	yes	2
GRMZM2G513107	2:100710102-100710293	1.30304	6.69572	2.36136	2.35248	2.57085	0.00165	0.011869	yes	2
GRMZM2G482977	10:83385872-83385984	5.86501	29.9887	2.35421	2.35224	9.5779	0.00715	0.037822	yes	2
GRMZM5G861572	10:136914516-136915420	0.152354	0.816001	2.42114	2.347	1.46623	5e-05	0.00060523	yes	2
GRMZM2G028821	1:81612700-81613806	0.85331	4.38095	2.3601	2.34658	2.27081	5e-05	0.00060523	yes	2
XLOC_073215	5:174188274-174189526	0.434376	2.2497	2.37272	2.34628	1.68412	0.00095	0.00761724	yes	2
XLOC_080915	6:61990481-61991422	0.128507	0.693873	2.43282	2.34536	1.24751	0.00305	0.019367	yes	2
GRMZM2G077530	1:85695769-85698348	0.355752	1.84667	2.37599	2.34378	2.07089	5e-05	0.00060523	yes	2
GRMZM2G127982	1:96252547-96254792	0.138882	0.745194	2.42376	2.34268	1.29283	0.0099	0.0488343	yes	2
GRMZM2G059088	7:5789157-5790020	0.279178	1.45583	2.38258	2.34169	2.24969	5e-05	0.00060523	yes	2
AC208427.3_FG010	8:167212470-167212647	0.833033	4.25186	2.35165	2.33782	3.11081	0.0028	0.0181108	yes	2
XLOC_052757	4:117185694-117186988	0.268548	1.3916	2.37349	2.33108	2.23533	5e-05	0.00060523	yes	2
GRMZM2G348584	1:22715117-22715760	0.737708	3.75009	2.3458	2.33022	1.99878	5e-05	0.00060523	yes	2
ClusterV2_46	3:122976685-122990255	0.238785	1.24031	2.37691	2.32931	3.46429	5e-05	0.00060523	yes	2
GRMZM2G561852	10:90218528-90219041	3.32372	16.6918	2.32827	2.3248	2.98469	5e-05	0.00060523	yes	2
GRMZM2G080293	4:75666989-75667455	0.150433	0.791483	2.39544	2.3207	1.26602	0.0025	0.0165053	yes	2
XLOC_079929	6:13518462-13518992	1.35345	6.79903	2.32869	2.32019	2.48584	5e-05	0.00060523	yes	2
GRMZM2G169535	1:180755653-180756260	0.151575	0.794658	2.3903	2.31617	1.26843	0.0017	0.0121567	yes	2
GRMZM5G830269	6:11201144-11205441	1.07267	5.36493	2.32235	2.31165	3.09615	5e-05	0.00060523	yes	2
GRMZM2G103801	1:141192679-141193247	1.23692	6.13109	2.30939	2.30013	2.47722	5e-05	0.00060523	yes	2
GRMZM2G384884	6:7624205-7626565	0.200255	1.02502	2.35575	2.29945	1.71294	5e-05	0.00060523	yes	2
GRMZM2G177801	2:24496236-24496842	0.141964	0.736448	2.37506	2.29631	1.43906	0.0004	0.00371968	yes	2
XLOC_034371	2:105934104-105934284	1.45092	7.14933	2.30084	2.29295	3.80815	0.0088	0.0444863	yes	2
GRMZM5G888939_X_1	8:143163872-143165022	1.81647	8.92334	2.29644	2.29014	2.05456	0.00595	0.0327811	yes	2
GRMZM2G110131	1:30037027-30039032	0.633829	3.13869	2.308	2.29	2.23282	5e-05	0.00060523	yes	2
GRMZM2G108153	2:25458480-25460181	0.337612	1.68857	2.32236	2.28877	2.59784	5e-05	0.00060523	yes	2
GRMZM2G509266	6:77965504-77965664	2.13002	10.4381	2.29292	2.28754	3.36077	0.00555	0.0310749	yes	2
GRMZM2G536584	10:88683462-88691892	0.210637	1.06507	2.33812	2.28468	2.21947	5e-05	0.00060523	yes	2
GRMZM2G526684	7:76765480-76765558	7.02699	34.1567	2.28119	2.27956	15.3383	0.00705	0.0373795	yes	2
XLOC_111373	9:146093120-146093375	0.801195	3.92802	2.29358	2.27935	2.03096	0.00265	0.0172989	yes	2
AC211738.4_FG003	9:23082518-23082632	8.32432	40.3873	2.2785	2.27712	6.39577	0.00385	0.023305	yes	2
Cluster_204	4:117184201-117184727	0.462527	2.27622	2.29903	2.2745	1.81432	5e-05	0.00060523	yes	2
GRMZM2G343636	6:107077038-107083151	0.317574	1.57478	2.30999	2.27439	1.86347	5e-05	0.00060523	yes	2
GRMZM2G127924	4:130459163-130461691	0.183459	0.921701	2.32884	2.26784	2.27691	5e-05	0.00060523	yes	2
GRMZM2G128771	2:212966266-212986315	0.146142	0.739862	2.33989	2.26377	1.76409	5e-05	0.00060523	yes	2
XLOC_103510	9:15284704-15284900	0.922007	4.45548	2.27273	2.2604	2.90554	0.00905	0.0455428	yes	2
GRMZM2G542194	5:154685393-154685698	0.999921	4.82445	2.27048	2.25911	1.8504	5e-05	0.00060523	yes	2
GRMZM2G127213	1:35580333-35580747	0.234139	1.1574	2.30545	2.25752	1.31773	0.0003	0.00293434	yes	2
GRMZM2G303155	6:74501322-74504392	0.138599	0.700175	2.3368	2.25675	1.60973	5e-05	0.00060523	yes	2
GRMZM2G449197	10:6346565-6348687	0.0946512	0.489801	2.3715	2.25576	1.39241	5e-05	0.00060523	yes	2
GRMZM5G884319	9:23620568-23621930	0.441293	2.1452	2.28131	2.25569	1.42412	0.00285	0.0183639	yes	2
GRMZM2G145065	1:52776934-52780818	0.988874	4.7552	2.26565	2.25416	2.79417	5e-05	0.00060523	yes	2
GRMZM5G808576	7:149982422-149984776	12.4203	59.2702	2.25461	2.25369	1.47692	5e-05	0.00060523	yes	2
GRMZM2G181242	4:233346383-233347686	0.150603	0.755294	2.32629	2.25252	1.36633	0.0003	0.00293434	yes	2
GRMZM2G512010	8:4793526-4793627	2.17587	10.3901	2.25555	2.25032	5.9817	0.0035	0.0216516	yes	2
GRMZM2G489359	10:100245705-100245813	438.042	2082.2	2.24897	2.24894	2.21418	5e-05	0.00060523	yes	2
GRMZM5G811042	5:181071495-181071712	0.271895	1.32708	2.28714	2.24586	1.68894	0.00255	0.0167728	yes	2
GRMZM2G054371	10:80925817-80929455	0.244816	1.198	2.29086	2.24509	2.47385	5e-05	0.00060523	yes	2
XLOC_077266	6:103965601-103966329	0.276145	1.34606	2.28524	2.2446	1.78222	5e-05	0.00060523	yes	2
GRMZM2G547483	2:176789006-176789901	0.578469	2.7668	2.25791	2.23838	2.54437	5e-05	0.00060523	yes	2
GRMZM2G082830	7:27326606-27328595	0.193261	0.948959	2.2958	2.23814	2.1984	5e-05	0.00060523	yes	2
GRMZM2G103273	4:4661683-4665505	0.668654	3.18454	2.25175	2.23486	2.26218	5e-05	0.00060523	yes	2
GRMZM2G452801	3:208482741-208483183	0.258546	1.25158	2.27526	2.23199	1.50602	0.00295	0.0188645	yes	2
GRMZM2G700791	8:167414898-167415475	3.9868	18.746	2.23328	2.23043	2.43073	5e-05	0.00060523	yes	2
GRMZM2G174449	4:25096836-25098362	1.48453	6.99569	2.23646	2.22884	3.12935	5e-05	0.00060523	yes	2
GRMZM2G570164	8:101328185-101328444	0.760913	3.60135	2.24274	2.2279	1.45018	5e-05	0.00060523	yes	2
XLOC_085411	7:40641001-40641206	3.79509	17.7841	2.22838	2.2254	2.09229	5e-05	0.00060523	yes	2
GRMZM2G024927	1:175516543-175521707	0.109485	0.548422	2.32455	2.22453	1.42273	0.0043	0.0254543	yes	2
XLOC_070235	5:37719196-37720152	0.392737	1.87187	2.25284	2.22426	2.29268	5e-05	0.00060523	yes	2
GRMZM2G168485	1:129268311-129269458	0.110501	0.5524	2.32166	2.22255	1.52674	5e-05	0.00060523	yes	2
GRMZM5G839530	4:117172447-117173596	0.199463	0.966542	2.27671	2.22099	2.20704	5e-05	0.00060523	yes	2
GRMZM2G325857	10:45479387-45483403	11.5978	54.1046	2.2219	2.22092	3.18252	5e-05	0.00060523	yes	2
GRMZM2G037574	2:183834146-183834918	0.150171	0.734696	2.29054	2.21704	1.40268	5e-05	0.00060523	yes	2
GRMZM2G120621	1:248000186-248003985	0.193776	0.936636	2.2731	2.21583	2.22614	5e-05	0.00060523	yes	2
GRMZM2G093684	1:242551821-242552227	0.30723	1.45915	2.24774	2.21138	1.679	0.003	0.019115	yes	2
Cluster_213	4:176191349-176192883	0.214575	1.02923	2.26201	2.21025	2.18189	5e-05	0.00060523	yes	2
GRMZM2G123531	4:171082126-171083115	0.264348	1.2581	2.25074	2.20859	1.80695	5e-05	0.00060523	yes	2
GRMZM2G162158	1:140927752-140929602	0.360537	1.70232	2.23928	2.20826	2.31464	5e-05	0.00060523	yes	2
GRMZM2G002678	3:174739122-174743871	0.787286	3.67208	2.22164	2.20735	2.97093	5e-05	0.00060523	yes	2
GRMZM2G512313	2:85069920-85080102	0.155714	0.750278	2.26853	2.19783	1.53323	5e-05	0.00060523	yes	2
GRMZM5G807821	9:148494317-148494518	0.466427	2.17244	2.2196	2.19561	2.26081	0.00345	0.0214138	yes	2
GRMZM2G151997	1:292412573-292414215	0.275717	1.29611	2.23293	2.19262	1.21433	0.0004	0.00371968	yes	2
GRMZM2G162056	2:118365106-118365860	1.86775	8.57206	2.19834	2.19232	3.01316	5e-05	0.00060523	yes	2
GRMZM2G143082	1:86270164-86271419	0.179068	0.853196	2.25237	2.19078	1.15196	0.0015	0.0110162	yes	2
GRMZM2G064910	4:121030004-121031178	0.114904	0.560204	2.28552	2.19066	1.46909	5e-05	0.00060523	yes	2
GRMZM2G029382	6:22558952-22562337	0.193138	0.914751	2.24375	2.1866	1.99187	5e-05	0.00060523	yes	2
XLOC_026612	2:61713840-61721488	1.20619	5.52479	2.19546	2.18616	1.88702	5e-05	0.00060523	yes	2
GRMZM2G144040	7:136885095-136886157	0.411337	1.90211	2.20921	2.18212	2.01605	5e-05	0.00060523	yes	2
GRMZM2G125571	3:219145193-219146419	1.7131	7.80485	2.18776	2.18121	2.84723	5e-05	0.00060523	yes	2
GRMZM2G132159	1:87245754-87246297	8.72777	39.602	2.18189	2.1806	2.88461	5e-05	0.00060523	yes	2
GRMZM2G023520	8:86268083-86269081	0.278264	1.29057	2.21348	2.17368	1.97193	5e-05	0.00060523	yes	2
GRMZM2G419672	4:9685549-9686426	0.343588	1.58173	2.20275	2.17045	1.30095	0.00155	0.0113023	yes	2
XLOC_044975	3:29647028-29647331	0.287317	1.3223	2.20234	2.16385	1.41279	0.004	0.0240445	yes	2
GRMZM2G579854	10:112427092-112428040	0.302801	1.39074	2.19941	2.16287	1.27275	5e-05	0.00060523	yes	2
XLOC_061029	4:187458398-187458641	0.831697	3.75758	2.17567	2.16227	1.6902	0.00075	0.00627367	yes	2
GRMZM5G898259	4:100408888-100409246	0.800393	3.6118	2.17394	2.16001	1.7669	0.00025	0.00252206	yes	2
GRMZM2G385236	1:123983179-123985570	0.0886047	0.429505	2.27722	2.15615	1.08339	0.0014	0.0104436	yes	2
XLOC_095423	8:97637625-97637819	1.9852	8.87565	2.16057	2.15494	2.77295	0.0024	0.0159973	yes	2
GRMZM2G120509	10:147605609-147606647	0.222483	1.02408	2.20256	2.15315	1.51554	5e-05	0.00060523	yes	2
GRMZM2G305685	6:60030907-60056686	4.73582	21.0657	2.15321	2.15085	2.86915	5e-05	0.00060523	yes	2
GRMZM2G110304	1:248182312-248200313	1.01445	4.53477	2.16033	2.14936	2.61032	5e-05	0.00060523	yes	2
GRMZM2G544135	1:68222863-68223078	15.1253	66.9424	2.14596	2.14522	2.10202	5e-05	0.00060523	yes	2
GRMZM2G053213	3:175936938-175938774	0.419012	1.88436	2.16901	2.14262	1.6564	5e-05	0.00060523	yes	2
GRMZM2G332904	4:76075555-76076164	0.151032	0.698962	2.21036	2.13836	1.36991	0.00295	0.0188645	yes	2
GRMZM2G585314	8:162296388-162296518	249.742	1097.57	2.1358	2.13576	2.85476	5e-05	0.00060523	yes	2
XLOC_069378	5:10912210-10912422	1.19584	5.26032	2.13713	2.12785	1.882	0.0035	0.0216516	yes	2
XLOC_077415	6:108320252-108320498	0.56253	2.49009	2.14619	2.12656	1.66794	0.0048	0.0277921	yes	2
GRMZM2G021973	5:30327173-30327551	0.784592	3.45679	2.13942	2.12531	2.01097	5e-05	0.00060523	yes	2
GRMZM2G108818	7:119630425-119630983	0.130414	0.601002	2.20427	2.12149	1.17622	0.0057	0.0317047	yes	2
GRMZM2G702239	5:207392197-207392608	0.437879	1.93756	2.14564	2.12049	1.81198	0.0001	0.00113386	yes	2
GRMZM5G835721	5:37724546-37725656	0.244777	1.09293	2.15866	2.11403	1.67116	5e-05	0.00060523	yes	2
GRMZM2G497088	10:141190954-141191440	0.31493	1.39469	2.14684	2.11205	1.34833	0.0001	0.00113386	yes	2
GRMZM2G486031	10:19567197-19567396	37.098	159.97	2.10838	2.10809	2.50523	5e-05	0.00060523	yes	2
GRMZM2G039968	1:27771690-27774590	0.173792	0.781974	2.16976	2.10738	1.41316	5e-05	0.00060523	yes	2
GRMZM2G104781	9:42289425-42289611	2.56914	11.0963	2.11073	2.10642	2.24767	0.0006	0.00522113	yes	2
GRMZM2G452572	10:96741120-96741866	0.217262	0.965242	2.15146	2.1014	1.19662	0.00175	0.0124229	yes	2
GRMZM2G564557	4:199889156-199892500	0.245206	1.08494	2.14554	2.10112	0.942195	0.00865	0.0438935	yes	2
GRMZM2G079774	1:108666656-108672742	0.251975	1.11104	2.14056	2.09734	2.38745	5e-05	0.00060523	yes	2
XLOC_049824	3:226963409-226963923	0.221803	0.981257	2.14536	2.09636	1.26784	0.00015	0.00161686	yes	2
GRMZM2G105980	6:42653475-42653682	0.347929	1.51701	2.12437	2.09296	1.69689	0.00405	0.0243	yes	2
GRMZM2G092938	10:102141636-102142423	75.1509	320.538	2.09263	2.09249	3.60425	5e-05	0.00060523	yes	2
GRMZM2G547928	9:47052998-47053074	6.17077	26.3216	2.09272	2.09094	12.2061	0.00895	0.0451272	yes	2
GRMZM2G304364	4:115233566-115236000	0.109965	0.500965	2.18766	2.09061	1.41859	5e-05	0.00060523	yes	2
GRMZM2G178769	3:21151936-21153907	1.14783	4.90979	2.09675	2.08717	3.14271	5e-05	0.00060523	yes	2
Cluster_153	3:123022019-123022473	0.439311	1.89786	2.11106	2.08617	1.46241	5e-05	0.00060523	yes	2
GRMZM2G393436	3:18335758-18337974	0.107804	0.489301	2.18231	2.08352	1.22336	0.00065	0.00557143	yes	2
GRMZM2G001508	6:129975716-129977955	4.1811	17.7302	2.08425	2.08162	3.09372	5e-05	0.00060523	yes	2
GRMZM2G064311	10:123875808-123877945	0.166941	0.738779	2.1458	2.08127	1.32618	0.0008	0.00661365	yes	2
XLOC_112597	scaffold_509:62703-63389	0.192741	0.844381	2.13123	2.07524	1.20295	0.0008	0.00661365	yes	2
GRMZM5G861332	4:52930377-52930603	0.299784	1.29466	2.11057	2.07434	1.66078	0.0043	0.0254543	yes	2
GRMZM2G420694	1:145693551-145695537	0.0956757	0.434102	2.18181	2.07125	1.17503	0.0004	0.00371968	yes	2
XLOC_046610	3:119225790-119226101	0.486057	2.07324	2.09269	2.07025	1.44955	0.0012	0.00921509	yes	2
GRMZM2G051952	2:30912037-30913685	1.20147	5.07196	2.07774	2.06863	2.63926	5e-05	0.00060523	yes	2
XLOC_097626	8:165722462-165722723	4.49621	18.8535	2.06805	2.06561	4.80784	0.00455	0.0266341	yes	2
XLOC_049438	3:216611465-216611811	0.721371	3.04911	2.07957	2.06444	1.79924	5e-05	0.00060523	yes	2
GRMZM2G145692	5:198033115-198033894	0.175865	0.766459	2.12374	2.06265	1.61151	0.00035	0.00332877	yes	2
XLOC_071871	5:114412872-114413122	0.707001	2.98358	2.07726	2.06182	1.781	0.0049	0.0282575	yes	2
AC183901.2_FG014	2:227006409-227006814	0.360021	1.53402	2.09117	2.06101	1.4348	5e-05	0.00060523	yes	2
GRMZM2G450935	4:26718183-26743704	0.425183	1.80362	2.08474	2.05918	1.28504	5e-05	0.00060523	yes	2
GRMZM2G436448	10:96702330-96704829	0.410495	1.74216	2.08544	2.05897	2.37325	5e-05	0.00060523	yes	2
GRMZM2G427836	3:44799642-44800180	0.557398	2.34638	2.07366	2.05414	1.73633	5e-05	0.00060523	yes	2
GRMZM2G421795	9:130358411-130360520	0.243406	1.03987	2.09498	2.05069	1.79476	5e-05	0.00060523	yes	2
GRMZM5G823813	1:130666241-130666487	57.5748	238.4	2.04987	2.04968	3.39882	5e-05	0.00060523	yes	2
GRMZM2G008193	2:115173931-115178098	0.854418	3.56275	2.05998	2.04723	2.78175	5e-05	0.00060523	yes	2
GRMZM2G324384	8:46461215-46464707	0.188352	0.80813	2.10116	2.04427	1.23578	5e-05	0.00060523	yes	2
GRMZM2G589048	5:104256178-104256764	0.186085	0.798271	2.10091	2.04336	1.43686	5e-05	0.00060523	yes	2
XLOC_046683	3:123025619-123026087	0.468827	1.95835	2.06251	2.03941	1.54455	5e-05	0.00060523	yes	2
GRMZM2G026532	2:204176990-204179237	0.15908	0.68347	2.10312	2.03613	1.92395	5e-05	0.00060523	yes	2
Cluster_326	8:41373650-41374321	0.200033	0.850839	2.08865	2.03513	1.4489	5e-05	0.00060523	yes	2
GRMZM2G171126	6:126774466-126774807	0.307109	1.28945	2.06993	2.03485	1.29274	0.0014	0.0104436	yes	2
GRMZM2G484018	7:165439586-165439881	1.52979	6.29869	2.04171	2.03461	1.74172	5e-05	0.00060523	yes	2
GRMZM2G063244	8:1141429-1145642	3.21678	13.2063	2.03753	2.03415	3.08212	5e-05	0.00060523	yes	2
XLOC_050883	4:25241681-25241935	0.650248	2.68662	2.04673	2.03007	1.54555	0.0016	0.0115865	yes	2
Cluster_162	3:172183428-172184147	0.593709	2.45483	2.04779	2.02956	1.8414	5e-05	0.00060523	yes	2
GRMZM2G540655	1:126667155-126667797	1.23873	5.0792	2.03574	2.02698	2.21319	5e-05	0.00060523	yes	2
XLOC_071034	5:70557603-70557833	1.41099	5.76783	2.03132	2.02363	2.09907	0.0002	0.00208081	yes	2
GRMZM2G566045	10:57609602-57609727	12.4086	50.4509	2.02354	2.02266	4.74132	0.0004	0.00371968	yes	2
GRMZM2G032592	10:105302637-105304169	0.22802	0.955688	2.06738	2.02047	1.26516	0.0011	0.00858278	yes	2
GRMZM2G515390	9:155179122-155198777	0.403141	1.66315	2.04456	2.01786	1.68495	5e-05	0.00060523	yes	2
GRMZM2G089813	4:183877279-183877807	0.122929	0.527893	2.10242	2.01666	1.08954	0.00505	0.028938	yes	2
XLOC_087841	7:152866433-152866674	1.18802	4.83501	2.02496	2.01585	1.73976	0.00065	0.00557143	yes	2
GRMZM2G146481	9:102688461-102689427	0.287006	1.18972	2.05147	2.01413	1.3677	0.0001	0.00113386	yes	2
GRMZM2G519445	9:32310044-32310230	0.4211	1.72476	2.03416	2.00864	1.84201	0.00685	0.0364583	yes	2
XLOC_066659	5:152205682-152205792	7.79167	31.3359	2.00781	2.00642	4.4716	0.0098	0.048464	yes	2
GRMZM2G145635	2:229688208-229689640	0.602829	2.45206	2.02418	2.00631	2.10679	5e-05	0.00060523	yes	2
XLOC_079976	6:14352238-14357188	0.538117	2.18794	2.02358	2.0036	0.98606	0.00905	0.0455428	yes	2
GRMZM2G135206	2:228704800-228705049	0.737154	2.98247	2.01647	2.00186	1.59071	0.00565	0.0315123	yes	2
GRMZM2G150743	1:120649853-120652004	0.266416	1.0944	2.03838	1.99835	1.61953	5e-05	0.00060523	yes	2
GRMZM2G483308	1:282193243-282193461	22.8649	91.3482	1.99824	1.99777	2.00009	5e-05	0.00060523	yes	2
GRMZM2G447795	6:129268962-129270180	0.218458	0.902245	2.04617	1.99749	1.64366	5e-05	0.00060523	yes	2
GRMZM2G005244	6:96366141-96366372	1.21366	4.87149	2.005	1.99612	1.65858	0.00395	0.0237955	yes	2
XLOC_049439	3:216613036-216613281	0.75182	3.02765	2.00974	1.99543	1.65984	0.0045	0.0264051	yes	2
GRMZM5G896498	10:100038538-100038951	55.3187	220.402	1.9943	1.9941	2.84704	5e-05	0.00060523	yes	2
GRMZM2G105954	4:57970814-57976241	0.286102	1.16644	2.02751	1.99026	1.89225	5e-05	0.00060523	yes	2
GRMZM2G579683	5:77745215-77745321	15.985	63.3322	1.98622	1.98555	5.66399	0.0057	0.0317047	yes	2
XLOC_091426	7:126378741-126379255	0.528987	2.12233	2.00435	1.98411	1.67964	5e-05	0.00060523	yes	2
GRMZM2G492670	1:282236100-282236369	16.5566	65.3398	1.98056	1.97991	2.32352	5e-05	0.00060523	yes	2
GRMZM2G008683	10:146122400-146163803	1.23371	4.89199	1.98742	1.97872	1.17117	0.00985	0.0486618	yes	2
AC202445.4_FG008	3:33477444-33477843	0.597306	2.37939	1.99405	1.97615	1.6306	0.00015	0.00161686	yes	2
GRMZM2G421493	1:127026614-127030874	0.178236	0.729743	2.0336	1.97448	1.63112	5e-05	0.00060523	yes	2
GRMZM2G165365	9:58858547-58862497	5.47364	21.4645	1.97138	1.96942	0.525572	0.00205	0.0140845	yes	2
GRMZM2G158655	2:20081039-20081392	0.213923	0.866742	2.01851	1.96915	1.1356	0.00575	0.0319189	yes	2
GRMZM2G573715	9:47168547-47168701	71.6692	280.325	1.96767	1.96753	2.43328	5e-05	0.00060523	yes	2
GRMZM2G054949	1:19769967-19772009	0.33616	1.34258	1.99778	1.9662	1.81343	5e-05	0.00060523	yes	2
GRMZM2G016642	1:66140065-66140878	0.136013	0.560423	2.04277	1.96594	1.06628	0.004	0.0240445	yes	2
GRMZM2G552982	1:238824820-238825649	1.40993	5.53496	1.97295	1.96536	2.14195	5e-05	0.00060523	yes	2
GRMZM5G872680	5:179910676-179918213	1.25551	4.92854	1.97288	1.96437	2.39644	5e-05	0.00060523	yes	2
XLOC_050229	4:4661157-4661455	1.14	4.47617	1.97323	1.96385	1.81662	0.00015	0.00161686	yes	2
GRMZM2G115803	5:6182262-6188137	0.278042	1.11107	1.99858	1.96053	1.5205	5e-05	0.00060523	yes	2
GRMZM2G072653	1:280908390-280910737	0.121904	0.502997	2.0448	1.95946	1.78604	5e-05	0.00060523	yes	2
XLOC_079886	6:11200865-11201000	9.56165	37.194	1.95974	1.95862	2.35199	0.0005	0.00450104	yes	2
GRMZM2G005678	3:49314749-49315244	0.283724	1.12675	1.98961	1.95238	1.32261	5e-05	0.00060523	yes	2
XLOC_027238	2:93599861-93599941	66.3592	256.682	1.95162	1.95145	2.26032	0.0005	0.00450104	yes	2
XLOC_048837	3:199173737-199174192	0.506708	1.98702	1.97138	1.95043	1.5168	0.00605	0.0331862	yes	2
XLOC_026202	2:46236872-46236986	41.6704	160.54	1.94584	1.94558	2.6736	5e-05	0.00060523	yes	2
GRMZM2G457231	5:125943116-125946053	0.110323	0.453199	2.03841	1.94472	1.31228	0.00365	0.0223624	yes	2
GRMZM5G865967	1:172897121-172899655	0.246617	0.976151	1.98483	1.94219	1.38663	5e-05	0.00060523	yes	2
GRMZM2G465579	1:89851194-89853066	0.119	0.485725	2.02918	1.94217	0.91826	0.0076	0.0396362	yes	2
GRMZM2G303113	2:14852319-14852645	0.940117	3.62475	1.94697	1.93568	1.77182	0.003	0.019115	yes	2
GRMZM2G452998	1:12450263-12450641	2.19761	8.41455	1.93695	1.93211	1.85202	5e-05	0.00060523	yes	2
GRMZM2G033437	10:117678060-117679226	0.12545	0.506179	2.01253	1.93011	1.44867	5e-05	0.00060523	yes	2
GRMZM2G083352_O_1	4:144022938-144049513	0.215834	0.850004	1.97755	1.92908	1.89213	5e-05	0.00060523	yes	2
GRMZM2G163537	8:107728409-107730679	0.105432	0.429461	2.02621	1.92869	1.00059	0.0085	0.0432792	yes	2
GRMZM2G542192	5:154686325-154686566	2.07089	7.90505	1.93253	1.9274	1.28658	5e-05	0.00060523	yes	2
GRMZM5G833386	10:64855833-64873466	0.898047	3.44303	1.93881	1.92702	1.59815	5e-05	0.00060523	yes	2
GRMZM5G802147	4:187596764-187596977	0.972202	3.72348	1.93732	1.92643	1.79327	0.00885	0.0446926	yes	2
GRMZM2G313750	4:130264540-130274213	0.401588	1.55149	1.94987	1.92365	2.04125	5e-05	0.00060523	yes	2
GRMZM2G153178	5:74173689-74178940	2.59935	9.88778	1.9275	1.92341	2.30768	5e-05	0.00060523	yes	2
GRMZM2G355233	1:220416770-220425317	0.142405	0.566928	1.99316	1.92048	2.00239	5e-05	0.00060523	yes	2
GRMZM5G800939	2:34127365-34129396	0.244153	0.946198	1.95436	1.91161	1.34345	5e-05	0.00060523	yes	2
GRMZM2G044992	1:225421513-225426644	0.332048	1.27532	1.94139	1.90986	2.21928	5e-05	0.00060523	yes	2
GRMZM2G125947	10:85005857-85008115	0.114055	0.455927	1.99907	1.90912	1.37961	5e-05	0.00060523	yes	2
GRMZM2G071145	7:140451102-140454600	1.35737	5.11718	1.91454	1.90676	2.34631	5e-05	0.00060523	yes	2
GRMZM2G390804	5:30517312-30517558	0.751735	2.84492	1.92009	1.90609	1.41891	0.0048	0.0277921	yes	2
GRMZM2G036290	8:8094881-8101524	0.398197	1.51849	1.93109	1.90477	2.1125	5e-05	0.00060523	yes	2
GRMZM2G140160	2:184056158-184064871	1.41685	5.33037	1.91154	1.90411	2.50832	5e-05	0.00060523	yes	2
GRMZM2G483479	1:80844273-80844418	256.126	956.629	1.9011	1.90106	2.45097	5e-05	0.00060523	yes	2
GRMZM2G062904	1:112988596-112989150	0.344274	1.30774	1.92544	1.89513	1.35021	5e-05	0.00060523	yes	2
GRMZM5G845018	1:83068075-83069470	0.292361	1.1138	1.92967	1.89404	1.57161	5e-05	0.00060523	yes	2
GRMZM2G055871	5:65224620-65226464	0.118472	0.466759	1.97813	1.89181	0.982145	0.0037	0.0225975	yes	2
GRMZM2G577866	8:122629900-122630163	0.335588	1.27143	1.92169	1.89063	1.36814	0.00895	0.0450454	yes	2
GRMZM2G119305	10:61689659-61692217	0.169823	0.656293	1.9503	1.88958	1.82398	5e-05	0.00060523	yes	2
GRMZM2G109133	1:121115637-121126189	0.18537	0.713382	1.94427	1.88855	1.13152	0.0006	0.00522113	yes	2
GRMZM2G390607	10:15574885-15576904	0.168442	0.648312	1.94444	1.88332	1.44197	5e-05	0.00060523	yes	2
GRMZM2G163985	10:6859645-6860068	0.164092	0.629945	1.94072	1.8781	1.01659	0.00845	0.0430923	yes	2
GRMZM5G822976	10:113074738-113076378	1.36727	5.05086	1.88523	1.87757	2.48481	5e-05	0.00060523	yes	2
GRMZM2G123107	9:140713090-140714500	0.137128	0.530564	1.95201	1.87739	1.39326	0.00015	0.00161686	yes	2
XLOC_092968	7:171458365-171458629	0.564452	2.09768	1.89387	1.8754	1.44215	0.00785	0.0406348	yes	2
GRMZM5G828291	3:158010160-158010874	0.29119	1.09095	1.90555	1.87	1.34982	5e-05	0.00060523	yes	2
GRMZM5G819091	1:130338702-130340368	48.4302	176.98	1.86961	1.86939	1.4467	5e-05	0.00060523	yes	2
GRMZM2G173251	1:44533348-44534414	0.470928	1.74507	1.88971	1.86764	1.94282	5e-05	0.00060523	yes	2
XLOC_018244	10:74021486-74021732	1.04983	3.85066	1.87495	1.86501	1.4571	0.0012	0.00921509	yes	2
GRMZM2G372502	1:36896609-36899146	0.311473	1.15762	1.89398	1.8608	1.4986	5e-05	0.00060523	yes	2
GRMZM2G038249	8:149039428-149039850	0.426667	1.56804	1.87778	1.85353	1.27681	0.00035	0.00332877	yes	2
GRMZM2G045502	10:122309217-122311705	0.144305	0.54706	1.92257	1.85205	1.23173	5e-05	0.00060523	yes	2
AC194960.3_FG005	10:123721070-123722651	0.167331	0.629924	1.91248	1.85146	1.21631	0.0004	0.00371968	yes	2
AC217499.3_FG002	3:221242931-221243351	0.255094	0.946192	1.8911	1.8508	1.23916	0.0048	0.0276767	yes	2
GRMZM2G068763	5:197083273-197083858	4.70712	17.0024	1.85282	1.85061	2.47856	5e-05	0.00060523	yes	2
XLOC_078595	6:147210835-147211419	0.549568	2.00797	1.86937	1.85052	1.49861	5e-05	0.00060523	yes	2
Cluster_85	2:19868533-19870725	0.388402	1.423	1.87331	1.84674	2.06171	5e-05	0.00060523	yes	2
GRMZM2G151183	1:176024691-176024891	5.18703	18.664	1.84727	1.84527	2.03556	5e-05	0.00060523	yes	2
GRMZM2G339645	7:156324057-156327322	2.23828	8.03974	1.84476	1.84012	2.76353	5e-05	0.00060523	yes	2
GRMZM2G117319	10:74022932-74026069	1.95835	7.0366	1.84524	1.83994	2.61987	5e-05	0.00060523	yes	2
GRMZM2G318279	10:117243906-117244695	0.609081	2.20594	1.85669	1.83972	1.47924	0.0015	0.0110162	yes	2
XLOC_082844	6:131595278-131595673	0.712763	2.56579	1.84791	1.83342	1.42746	0.00065	0.00557143	yes	2
GRMZM2G008550	1:13294165-13294634	0.189585	0.700407	1.88535	1.83164	1.10455	0.00195	0.0135313	yes	2
GRMZM2G579108	1:229185511-229188783	0.260024	0.949751	1.86891	1.82957	1.26269	5e-05	0.00060523	yes	2
XLOC_102148	8:159145435-159145832	0.914523	3.27274	1.83941	1.82812	1.37949	5e-05	0.00060523	yes	2
GRMZM5G805729	4:24019963-24020273	2.85589	10.1503	1.82951	1.82589	1.60517	5e-05	0.00060523	yes	2
GRMZM2G094252	1:117866785-117868270	1.77454	6.30236	1.82844	1.82263	2.41615	5e-05	0.00060523	yes	2
GRMZM2G458867	8:42958986-42993078	0.438309	1.57491	1.84525	1.82184	1.31289	0.00015	0.00161686	yes	2
GRMZM5G849535	3:20468098-20468828	1.8146	6.43222	1.82567	1.81998	1.38796	5e-05	0.00060523	yes	2
GRMZM2G120717	2:14733344-14734739	0.21543	0.784947	1.86538	1.81818	1.67078	5e-05	0.00060523	yes	2
XLOC_053087	4:134352303-134353035	0.206142	0.751613	1.86635	1.81708	1.45711	0.00015	0.00161686	yes	2
XLOC_087976	7:156489620-156490147	0.77545	2.75341	1.82811	1.81486	1.67844	5e-05	0.00060523	yes	2
GRMZM2G570037	1:125780407-125780513	11.6915	41.1548	1.8156	1.81472	1.5826	0.0068	0.0364015	yes	2
GRMZM2G125853	7:115996519-116010636	0.124273	0.462306	1.89533	1.81455	1.07909	0.0001	0.00113386	yes	2
GRMZM2G069126	7:141170322-141171382	0.491684	1.75088	1.83228	1.81145	1.53779	5e-05	0.00060523	yes	2
GRMZM5G892492	1:19613757-19614840	0.829136	2.93503	1.8237	1.81131	1.93621	5e-05	0.00060523	yes	2
GRMZM2G176721	7:100831612-100837019	0.299456	1.07532	1.84435	1.81031	1.73073	5e-05	0.00060523	yes	2
GRMZM2G337534	7:131117801-131118639	0.253301	0.912714	1.84931	1.80917	1.47984	5e-05	0.00060523	yes	2
GRMZM2G435244	1:111134939-111139069	0.206126	0.746985	1.85755	1.80839	1.26145	5e-05	0.00060523	yes	2
GRMZM2G548835	1:2229740-2229997	2.39495	8.39514	1.80956	1.80526	1.30606	0.0001	0.00113386	yes	2
GRMZM2G057759	2:183852478-183854112	0.294814	1.05504	1.83942	1.80491	1.19607	0.0039	0.02356	yes	2
XLOC_052752	4:117178478-117178876	0.605479	2.13885	1.82069	1.80378	1.36706	0.00025	0.00252206	yes	2
GRMZM2G050150	2:161923541-161924237	0.183628	0.66502	1.85662	1.80164	1.1136	0.0007	0.00591267	yes	2
AC203278.4_FG004	5:69999882-70000737	0.421392	1.49011	1.82218	1.798	1.33693	5e-05	0.00060523	yes	2
GRMZM2G422240	3:20468098-20468828	5.65328	19.6711	1.79892	1.7971	1.66499	5e-05	0.00060523	yes	2
GRMZM2G164098	4:156846887-156847534	0.251709	0.89773	1.83453	1.7943	1.23758	0.0004	0.00371968	yes	2
GRMZM2G582693	2:224728805-224733211	0.151364	0.548931	1.85861	1.79235	0.939628	0.00685	0.0365785	yes	2
AC205122.4_FG010	7:2178960-2210987	0.129693	0.473442	1.86808	1.79108	1.80229	5e-05	0.00060523	yes	2
GRMZM2G041456	1:130618510-130618984	104.004	359.828	1.79067	1.79057	2.39692	5e-05	0.00060523	yes	2
GRMZM2G046994	4:50883662-50885301	0.187738	0.673978	1.84398	1.79036	1.23694	0.0025	0.0165053	yes	2
XLOC_079959	6:14051678-14052123	0.539015	1.889	1.80922	1.79032	1.37706	5e-05	0.00060523	yes	2
GRMZM2G015216	1:95795268-95802369	0.91948	3.19829	1.79841	1.78731	2.20744	5e-05	0.00060523	yes	2
GRMZM2G056500	2:103380501-103382701	14.0687	48.4908	1.78523	1.78449	2.67732	5e-05	0.00060523	yes	2
GRMZM2G581811	1:282050102-282050328	4.93312	17.0077	1.78562	1.78354	1.61775	5e-05	0.00060523	yes	2
GRMZM2G012585	1:83194617-83195713	0.736777	2.55907	1.79632	1.7825	1.40284	5e-05	0.00060523	yes	2
GRMZM2G132797	10:31771208-31771801	0.259572	0.913337	1.81501	1.77619	1.2593	0.0001	0.00113386	yes	2
GRMZM2G425920	10:122253985-122259270	0.190554	0.675574	1.82592	1.77332	1.60175	5e-05	0.00060523	yes	2
GRMZM2G422419	1:177654020-177654401	0.725411	2.49754	1.78364	1.76965	1.51835	0.00085	0.00695162	yes	2
GRMZM5G892032	2:174284305-174284917	0.296913	1.03639	1.80345	1.76952	1.24914	0.0001	0.00113386	yes	2
Cluster_203	4:117179479-117180036	0.168849	0.599738	1.8286	1.76945	1.07208	0.0015	0.0110162	yes	2
GRMZM2G315767	10:64855833-64873466	0.603705	2.08146	1.78568	1.76889	1.77405	5e-05	0.00060523	yes	2
GRMZM2G052571	3:149424177-149425328	0.197063	0.695248	1.81887	1.76806	1.42394	5e-05	0.00060523	yes	2
XLOC_104859	9:70245574-70246050	0.611752	2.10344	1.78173	1.76518	1.44303	5e-05	0.00060523	yes	2
GRMZM2G405387	9:42291245-42294153	0.121786	0.43714	1.84374	1.76253	1.16014	0.00025	0.00252206	yes	2
GRMZM2G032028	6:104030338-104033096	2.56818	8.7363	1.76627	1.76232	1.6477	5e-05	0.00060523	yes	2
XLOC_036030	2:180825758-180826253	2.03715	6.93262	1.76685	1.76186	1.85362	5e-05	0.00060523	yes	2
GRMZM2G498673	1:131361342-131361816	14.2091	48.1129	1.75961	1.75889	2.55592	5e-05	0.00060523	yes	2
XLOC_049442	3:216622040-216623026	0.422161	1.45186	1.78204	1.75816	1.69761	5e-05	0.00060523	yes	2
GRMZM2G407119	9:145064264-145067566	0.220596	0.768621	1.80086	1.75555	1.70467	5e-05	0.00060523	yes	2
GRMZM2G505402	7:234116-234656	0.176449	0.619226	1.81121	1.7548	1.11892	0.0012	0.00921509	yes	2
GRMZM2G141136	10:72592942-72624711	3.3984	11.4771	1.75583	1.75285	1.91362	5e-05	0.00060523	yes	2
XLOC_079928	6:13506388-13506673	33.6105	113.197	1.75186	1.75155	2.82349	5e-05	0.00060523	yes	2
GRMZM2G038707	4:52156631-52160128	1.54397	5.22184	1.75791	1.75136	1.85402	5e-05	0.00060523	yes	2
GRMZM2G120587	1:68140900-68144676	2.5619	8.64704	1.75499	1.75104	2.28324	5e-05	0.00060523	yes	2
GRMZM2G313104	1:72049368-72050532	0.490529	1.66789	1.76561	1.74512	1.9838	5e-05	0.00060523	yes	2
GRMZM2G575954	10:100031399-100033677	5.7902	19.4309	1.74666	1.74492	1.27481	0.0042	0.0249994	yes	2
GRMZM2G450939	4:26718183-26743704	2.73408	9.18596	1.74838	1.74468	1.95498	5e-05	0.00060523	yes	2
XLOC_075149	6:13181352-13182398	2.21391	7.43462	1.74766	1.7431	2.11041	5e-05	0.00060523	yes	2
GRMZM2G163781	3:90175903-90178044	0.433162	1.47229	1.76508	1.74192	1.70309	5e-05	0.00060523	yes	2
GRMZM5G832914	7:85167256-85174322	2.53149	8.45635	1.74005	1.73607	0.946443	0.00625	0.0340336	yes	2
GRMZM2G311929	1:113037996-113041722	0.284089	0.969168	1.7704	1.7353	1.88227	5e-05	0.00060523	yes	2
XLOC_018585	10:86724150-86724259	789.235	2621.13	1.73166	1.73165	2.5732	5e-05	0.00060523	yes	2
GRMZM2G149273	9:125686150-125687640	1.48724	4.95536	1.73636	1.72959	1.82885	5e-05	0.00060523	yes	2
GRMZM2G578251	3:48710425-48711120	0.476096	1.59439	1.74368	1.72271	1.47449	5e-05	0.00060523	yes	2
GRMZM2G103668	1:85555866-85557034	0.25264	0.854103	1.75733	1.71812	1.3308	5e-05	0.00060523	yes	2
XLOC_034373	2:105941645-105941944	0.782567	2.59639	1.73022	1.71745	1.37428	0.00705	0.0373795	yes	2
GRMZM2G398996	7:7070208-7071628	0.377009	1.25934	1.73999	1.71364	1.60978	5e-05	0.00060523	yes	2
GRMZM2G397950	4:220105654-220111599	0.782247	2.58734	1.72578	1.71301	1.59168	5e-05	0.00060523	yes	2
GRMZM2G092474	3:186851760-186852893	1.61106	5.30132	1.71834	1.71213	2.33093	5e-05	0.00060523	yes	2
GRMZM2G431236	1:273823580-273824619	0.352168	1.17647	1.74013	1.71194	1.1536	0.0003	0.00293434	yes	2
GRMZM2G102855	7:30664470-30667329	0.248272	0.835815	1.75126	1.71145	1.06536	0.0014	0.0104436	yes	2
GRMZM2G106356	4:2656841-2659044	0.234107	0.788298	1.75158	1.70941	1.83304	5e-05	0.00060523	yes	2
GRMZM2G152079	2:100009207-100009771	2.31074	7.57626	1.71313	1.7088	1.88553	5e-05	0.00060523	yes	2
XLOC_094107	8:28475405-28475648	0.774315	2.55155	1.72038	1.70751	1.37026	0.0044	0.0259279	yes	2
GRMZM2G487208	7:6952287-6963932	1.4798	4.84114	1.70994	1.70321	1.49711	5e-05	0.00060523	yes	2
GRMZM2G013530	7:144132739-144134501	0.768616	2.52494	1.71591	1.70297	2.11248	5e-05	0.00060523	yes	2
XLOC_026201	2:46235943-46236208	1.69361	5.52349	1.70548	1.69959	1.42972	5e-05	0.00060523	yes	2
GRMZM2G094028	3:20067446-20076420	0.334948	1.10937	1.72773	1.69824	1.7855	5e-05	0.00060523	yes	2
GRMZM2G556180	5:170221125-170221348	2.37462	7.71965	1.70084	1.69664	1.36431	0.0005	0.00450104	yes	2
XLOC_071035	5:70558390-70559374	0.399824	1.31762	1.7205	1.69577	1.59987	5e-05	0.00060523	yes	2
XLOC_037857	2:230799829-230799925	90.2273	291.975	1.69421	1.6941	2.169	5e-05	0.00060523	yes	2
XLOC_001932	1:61246113-61246412	3.27508	10.6086	1.69563	1.69259	1.73318	5e-05	0.00060523	yes	2
GRMZM2G412343	1:128055797-128058913	0.127989	0.436017	1.76836	1.69255	1.4601	5e-05	0.00060523	yes	2
GRMZM5G859334_O_1	8:159161078-159162821	35.6308	115.112	1.69184	1.69156	1.36946	5e-05	0.00060523	yes	2
GRMZM2G702599	4:139022452-139031123	1.12307	3.64889	1.70001	1.69117	1.23467	0.0001	0.00113386	yes	2
GRMZM2G081363	3:127990106-127991462	0.495155	1.61346	1.7042	1.68427	1.82955	5e-05	0.00060523	yes	2
GRMZM2G491481	10:119513818-119513961	383.985	1232.43	1.68238	1.68236	2.36457	5e-05	0.00060523	yes	2
GRMZM2G181218	1:74611324-74617107	16.4475	52.7328	1.68083	1.68023	1.39316	5e-05	0.00060523	yes	2
GRMZM2G046037	8:139164343-139166103	0.269582	0.885284	1.71542	1.67907	1.74383	5e-05	0.00060523	yes	2
GRMZM2G473679	6:69553131-69553473	1.92584	6.18845	1.68409	1.67895	1.51486	5e-05	0.00060523	yes	2
GRMZM2G047652	3:188433721-188435241	0.46115	1.49653	1.69831	1.67697	1.71344	5e-05	0.00060523	yes	2
GRMZM2G452896	9:103939079-103942462	1.02617	3.30162	1.6859	1.67628	2.42559	5e-05	0.00060523	yes	2
GRMZM2G061126	4:89846709-89847733	0.725149	2.3395	1.68985	1.67625	1.32069	5e-05	0.00060523	yes	2
GRMZM2G105233	2:102088002-102090491	0.268952	0.88143	1.7125	1.6761	1.38018	5e-05	0.00060523	yes	2
GRMZM2G306643	10:130982295-130983119	0.159123	0.529866	1.73549	1.67453	1.04651	0.0048	0.0277921	yes	2
GRMZM2G105777	1:226002385-226002703	1.55224	4.97534	1.68044	1.67408	1.77557	0.0002	0.00208081	yes	2
GRMZM5G861408	8:169204184-169204808	0.254277	0.832776	1.71153	1.6731	1.24492	0.0005	0.00450104	yes	2
GRMZM2G326011	10:132730636-132732518	0.154795	0.512129	1.72614	1.66373	0.920848	0.0034	0.0211473	yes	2
GRMZM2G428119	10:145960203-145960768	0.687475	2.19457	1.67456	1.66028	1.39166	5e-05	0.00060523	yes	2
GRMZM2G178115	3:37301237-37301882	0.686082	2.18982	1.67436	1.66006	1.53081	5e-05	0.00060523	yes	2
GRMZM2G173738	2:89897720-89899192	0.217438	0.707717	1.70257	1.65794	1.5072	5e-05	0.00060523	yes	2
GRMZM2G041756	3:205446880-205447425	0.150722	0.497032	1.72145	1.65751	0.985145	0.00395	0.0237955	yes	2
GRMZM5G836746	5:209268271-209268485	1.7486	5.53106	1.66136	1.65573	1.79839	0.0013	0.00982964	yes	2
GRMZM2G049979	10:59020778-59026291	3.77728	11.92	1.65797	1.65536	2.13569	5e-05	0.00060523	yes	2
GRMZM2G103059	1:25810382-25815133	1.47587	4.66766	1.66114	1.65448	1.34183	5e-05	0.00060523	yes	2
GRMZM5G889888	4:50883662-50885301	0.419308	1.3382	1.67421	1.65095	1.17177	0.0015	0.0110162	yes	2
GRMZM5G862276	10:31141066-31142478	2.16804	6.81367	1.65204	1.64752	1.63421	5e-05	0.00060523	yes	2
AC185464.3_FG003	5:197358621-197358816	6.32943	19.8483	1.64887	1.64732	1.70682	5e-05	0.00060523	yes	2
GRMZM2G392040	10:139219427-139221025	0.269559	0.864908	1.68195	1.64598	1.25793	5e-05	0.00060523	yes	2
GRMZM2G478078	5:36466898-36493986	0.141131	0.462839	1.71348	1.64555	1.40444	5e-05	0.00060523	yes	2
GRMZM2G077262	3:18141710-18165444	0.82435	2.59936	1.65683	1.64497	1.86517	5e-05	0.00060523	yes	2
AC209259.3_FG002_O_1	1:61259870-61260124	3.41228	10.6745	1.64536	1.64249	1.51617	5e-05	0.00060523	yes	2
GRMZM2G075414	4:170824767-170827643	0.811932	2.55379	1.65321	1.64119	1.68063	5e-05	0.00060523	yes	2
ClusterV2_40	5:114403171-114405627	0.289529	0.924115	1.67436	1.6409	1.79964	5e-05	0.00060523	yes	2
GRMZM6G397851	1:175117606-175118330	0.936067	2.9373	1.64981	1.63938	1.54103	5e-05	0.00060523	yes	2
GRMZM2G568654	2:73990646-73990768	23.894	74.4256	1.63915	1.63874	1.76456	5e-05	0.00060523	yes	2
GRMZM2G181123	10:17516514-17518018	0.276637	0.881596	1.67212	1.63717	1.27425	5e-05	0.00060523	yes	2
Cluster_259	6:14407356-14407905	0.42382	1.33886	1.65949	1.63657	1.1938	5e-05	0.00060523	yes	2
XLOC_107825	9:13372540-13372785	1.39893	4.3698	1.64324	1.63627	1.37727	0.0009	0.00729152	yes	2
GRMZM2G141491	1:112794884-112797204	0.214251	0.686342	1.67962	1.63468	1.5594	5e-05	0.00060523	yes	2
GRMZM5G824952	1:46388006-46388187	3.59719	11.1702	1.63471	1.632	2.64733	0.0093	0.0465359	yes	2
GRMZM2G119798	10:141516360-141516514	4.79286	14.8357	1.63012	1.62808	3.67965	0.00565	0.0315123	yes	2
XLOC_047588	3:157509405-157509544	6.96503	21.5148	1.62713	1.62573	4.0963	0.00355	0.0218739	yes	2
Cluster_100	2:81924214-81924977	0.423693	1.32775	1.64789	1.62506	1.60949	5e-05	0.00060523	yes	2
GRMZM2G002483	10:46005661-46006214	0.354146	1.11316	1.65225	1.62497	1.11304	0.00015	0.00161686	yes	1
GRMZM2G520669	1:93688415-93689223	0.195423	0.621111	1.66825	1.6193	1.02145	0.0009	0.00729152	yes	1
GRMZM2G005458	1:156747601-156748998	0.326622	1.02409	1.64865	1.61916	0.99799	0.0017	0.0121567	yes	1
GRMZM2G176144	1:8208008-8214743	0.855235	2.64639	1.62963	1.6183	1.01759	0.00375	0.0228276	yes	1
XLOC_090466	7:83662088-83662917	1.30495	4.02655	1.62555	1.61811	1.81127	5e-05	0.00060523	yes	1
GRMZM2G440526	3:145868694-145871029	0.151488	0.485093	1.67906	1.61627	1.36637	5e-05	0.00060523	yes	1
GRMZM2G012062	10:1894282-1897425	1.05591	3.25615	1.62468	1.61551	2.32544	5e-05	0.00060523	yes	1
AC148152.3_FG005	2:231952641-231954277	0.668573	2.06743	1.62868	1.61422	1.59537	5e-05	0.00060523	yes	1
GRMZM2G082500	2:212313576-212318593	0.472585	1.46655	1.63378	1.61338	1.81557	5e-05	0.00060523	yes	1
GRMZM5G894387	6:137335414-137341548	0.507212	1.57108	1.6311	1.61208	1.14184	0.00405	0.0242775	yes	1
GRMZM2G550599	1:131356415-131356571	70.6431	215.686	1.61031	1.61017	1.75017	5e-05	0.00060523	yes	1
XLOC_112288	scaffold_272:889-1089	3.63873	11.127	1.61256	1.60989	2.1831	0.0009	0.00729152	yes	1
GRMZM2G094240	1:117879672-117880712	0.135023	0.431441	1.67595	1.60594	0.823286	0.00665	0.0357363	yes	1
GRMZM2G378479	2:237059325-237068564	1.9545	5.96918	1.61073	1.60579	1.2054	0.0006	0.00522113	yes	1
GRMZM5G821433	10:122717060-122718495	0.264526	0.82406	1.63934	1.60321	1.48866	5e-05	0.00060523	yes	1
Cluster_246	5:114398479-114402020	0.535207	1.64493	1.61985	1.60189	2.11074	5e-05	0.00060523	yes	1
GRMZM2G091320	1:229770645-229774453	0.424968	1.309	1.62303	1.60046	1.60826	5e-05	0.00060523	yes	1
GRMZM2G335635	6:104030338-104033096	26.6455	80.6654	1.59806	1.5977	2.35195	5e-05	0.00060523	yes	1
GRMZM2G073534	10:144911309-144911708	78.0963	236.339	1.59753	1.59741	2.46712	5e-05	0.00060523	yes	1
XLOC_051606	4:53319795-53319965	2.44328	7.41218	1.60108	1.59713	3.08353	0.0094	0.0469517	yes	1
XLOC_079938	6:13699932-13700186	1.42605	4.32971	1.60225	1.59549	1.21741	0.0018	0.0126944	yes	1
GRMZM2G546369	10:144803532-144808264	0.162379	0.510338	1.65208	1.59387	1.40402	5e-05	0.00060523	yes	1
GRMZM2G110470	1:71300269-71304767	0.280542	0.866693	1.6273	1.59332	1.70465	5e-05	0.00060523	yes	1
GRMZM2G483927	5:4096664-4097295	0.226237	0.702375	1.63441	1.5924	1.16029	0.00025	0.00252206	yes	1
GRMZM2G145213	4:5967056-5972575	0.917117	2.78094	1.60039	1.58993	2.02051	5e-05	0.00060523	yes	1
GRMZM2G065866	3:166592121-166594884	0.318381	0.974768	1.61431	1.58441	1.12489	5e-05	0.00060523	yes	1
GRMZM2G074307	4:89839033-89841610	2.23384	6.7176	1.58842	1.58412	1.78198	5e-05	0.00060523	yes	1
ClusterV2_1	2:113570588-113594904	0.415973	1.26684	1.60668	1.58374	2.44418	5e-05	0.00060523	yes	1
XLOC_102151	8:159162968-159163370	2.0173	6.05213	1.58502	1.58027	1.47479	5e-05	0.00060523	yes	1
GRMZM2G397889	6:120774312-120776525	0.241298	0.740447	1.61758	1.57835	1.31735	5e-05	0.00060523	yes	1
GRMZM2G561354	2:22533439-22533895	0.320332	0.976347	1.60783	1.57818	1.02642	0.00115	0.00890855	yes	1
GRMZM2G006759	4:24473155-24477140	0.571044	1.72298	1.59323	1.57654	1.66897	5e-05	0.00060523	yes	1
GRMZM2G056875	7:92751683-92754063	0.178976	0.553614	1.62911	1.5765	1.42014	5e-05	0.00060523	yes	1
GRMZM2G032514	7:22710943-22712601	0.920105	2.76313	1.58643	1.57605	1.19194	0.0009	0.00729152	yes	1
GRMZM2G458718	1:87755144-87759703	0.548184	1.65394	1.59317	1.57579	1.71049	5e-05	0.00060523	yes	1
GRMZM2G059978	10:17551047-17551634	0.540921	1.62956	1.59099	1.57339	1.08163	0.00065	0.00557143	yes	1
GRMZM5G864903	3:64281600-64283542	1.08931	3.26067	1.58175	1.57299	2.29908	5e-05	0.00060523	yes	1
GRMZM2G546229	1:33130231-33131542	0.524005	1.57582	1.58845	1.5703	1.1615	0.00075	0.00627367	yes	1
GRMZM5G849934	10:72592942-72624711	9.07841	26.9648	1.57056	1.56951	1.17468	5e-05	0.00060523	yes	1
GRMZM2G414815	2:145133936-145137558	0.724724	2.17036	1.58243	1.56929	2.10137	5e-05	0.00060523	yes	1
GRMZM2G391353	1:10259681-10260207	2.5031	7.44151	1.57188	1.56806	1.3284	5e-05	0.00060523	yes	1
GRMZM2G026884	10:80766402-80768138	0.308461	0.932771	1.59644	1.56579	1.19159	5e-05	0.00060523	yes	1
XLOC_037924	2:232234465-232234596	8.77972	26.0104	1.56684	1.56575	2.85906	0.00975	0.0482904	yes	1
GRMZM2G061172	6:143955271-143956126	0.259641	0.786349	1.59865	1.56236	1.29411	0.0001	0.00113386	yes	1
GRMZM2G490483	10:24135480-24135939	0.203589	0.618308	1.60267	1.55663	0.95989	0.00445	0.0261749	yes	1
GRMZM2G127328	6:7047883-7050404	0.179533	0.545491	1.6033	1.55131	1.29339	5e-05	0.00060523	yes	1
GRMZM2G574891	1:130117464-130117562	25.5971	74.7479	1.54605	1.54568	4.56612	0.00195	0.0135313	yes	1
GRMZM2G164612	8:151637901-151648571	0.174571	0.528568	1.59828	1.54495	0.959408	0.0044	0.0259279	yes	1
GRMZM2G050246	3:113797173-113800725	3.61418	10.5418	1.54438	1.54176	0.883527	0.0017	0.0121567	yes	1
AC211687.3_FG007	8:15957951-15958865	0.405318	1.19718	1.56251	1.53935	0.969885	0.00365	0.0223624	yes	1
XLOC_103527	9:15689889-15690031	9.1802	26.6362	1.53679	1.53576	1.52792	0.0005	0.00450104	yes	1
AC208551.3_FG008	10:128773479-128773941	0.173592	0.522244	1.58902	1.53558	0.897661	0.00745	0.0389427	yes	1
GRMZM2G138616	10:93240623-93246266	0.144171	0.436648	1.59869	1.53461	1.05559	0.00205	0.0140845	yes	1
GRMZM2G011216	1:115113834-115114285	2.2973	6.65432	1.53435	1.53025	1.3983	5e-05	0.00060523	yes	1
XLOC_076731	6:88314570-88314652	39.5715	114.276	1.52999	1.52975	5.66073	0.005	0.0285798	yes	1
GRMZM2G330973	7:102446295-102449291	0.225361	0.669226	1.57026	1.52902	1.10112	0.0003	0.00293434	yes	1
XLOC_007985	1:291873037-291873832	0.70322	2.04038	1.53679	1.52347	1.56679	5e-05	0.00060523	yes	1
GRMZM2G360921	10:108400088-108401092	0.480448	1.39867	1.5416	1.52216	1.44197	5e-05	0.00060523	yes	1
GRMZM2G063693	9:999982-1003109	0.296653	0.870417	1.55293	1.52158	1.18825	0.0001	0.00113386	yes	1
GRMZM2G051135	9:89114415-89115194	0.233629	0.689368	1.56105	1.52137	1.17971	0.0018	0.0126944	yes	1
GRMZM2G047613	8:61163372-61164815	0.593849	1.72265	1.53646	1.52072	1.70684	5e-05	0.00060523	yes	1
XLOC_031625	2:3689800-3689887	78.0762	223.812	1.51933	1.51921	1.84469	0.0006	0.00522113	yes	1
GRMZM2G026143	9:89248791-89249564	7.38535	21.1851	1.52031	1.51904	2.04123	5e-05	0.00060523	yes	1
GRMZM2G077412	2:211817148-211819889	0.872073	2.51766	1.52956	1.51883	1.66019	5e-05	0.00060523	yes	1
XLOC_051571	4:52160827-52160963	44.6442	127.936	1.51888	1.51867	1.29732	5e-05	0.00060523	yes	1
GRMZM2G097766	10:67746202-67747377	0.392767	1.14264	1.54063	1.51692	1.20024	5e-05	0.00060523	yes	1
GRMZM2G530947	5:19214171-19214497	0.48855	1.41645	1.5357	1.51662	0.960576	0.00645	0.0349514	yes	1
GRMZM2G096412	7:156954007-156955855	5.07536	14.4849	1.51297	1.51112	2.7034	5e-05	0.00060523	yes	1
GRMZM2G009669	10:74667913-74668107	9.10928	25.9751	1.51172	1.51069	1.5295	5e-05	0.00060523	yes	1
GRMZM5G866746	2:39466217-39470213	0.157412	0.466539	1.56746	1.50919	0.972268	0.0011	0.00858278	yes	1
GRMZM2G701269	3:1730797-1732096	0.158012	0.467759	1.56573	1.50772	0.780832	0.0098	0.0483533	yes	1
GRMZM2G155203	7:85167256-85174322	0.815311	2.33189	1.51608	1.50466	1.35153	5e-05	0.00060523	yes	1
AC217051.3_FG004	10:113982354-113983236	0.524522	1.50326	1.51902	1.50134	1.53449	5e-05	0.00060523	yes	1
XLOC_075950	6:54073208-54073635	0.469806	1.34749	1.52014	1.50042	1.18927	0.00265	0.0172989	yes	1
GRMZM2G099049	7:120797781-120799329	7.02327	19.8851	1.50147	1.50015	1.85057	5e-05	0.00060523	yes	1
GRMZM2G402631	1:178035094-178036072	9.79261	27.6678	1.49844	1.49749	1.95574	5e-05	0.00060523	yes	1
GRMZM2G108467	10:90325097-90352125	116.142	327.936	1.49753	1.49744	1.67363	5e-05	0.00060523	yes	1
GRMZM2G553379	5:6993293-7011505	1.9824	5.61441	1.50189	1.49719	1.93817	5e-05	0.00060523	yes	1
GRMZM2G004119	9:149547638-149549020	0.246454	0.713656	1.53391	1.4966	1.17594	5e-05	0.00060523	yes	1
GRMZM2G701063	6:108491298-108493660	3.22383	9.11111	1.49885	1.49597	2.32363	5e-05	0.00060523	yes	1
XLOC_094358	8:41372555-41372843	0.632713	1.80194	1.50993	1.49529	1.01687	0.00455	0.0266341	yes	1
GRMZM5G813160	1:152745323-152747047	0.428076	1.22496	1.5168	1.49521	1.51889	5e-05	0.00060523	yes	1
XLOC_054381	4:177353136-177355220	0.732062	2.07879	1.50571	1.49306	1.16251	0.0004	0.00371968	yes	1
GRMZM2G119523	3:90422237-90426285	0.235265	0.679355	1.52988	1.49091	1.15052	5e-05	0.00060523	yes	1
GRMZM2G046601	9:146319630-146328499	0.533613	1.51446	1.50494	1.48765	1.38323	5e-05	0.00060523	yes	1
AC177911.4_FG005	1:16789304-16789868	18.8393	52.789	1.48649	1.486	1.98848	5e-05	0.00060523	yes	1
GRMZM2G178481	1:87349798-87350619	88.0809	246.464	1.48448	1.48437	2.1232	5e-05	0.00060523	yes	1
GRMZM2G550611	1:131323201-131332524	11.6322	32.5416	1.48417	1.48336	2.1385	5e-05	0.00060523	yes	1
GRMZM2G009376	4:118569629-118570649	0.285106	0.814709	1.51479	1.48265	1.36278	5e-05	0.00060523	yes	1
GRMZM2G097253	1:19525039-19525896	3.44572	9.64697	1.48527	1.48258	1.35166	5e-05	0.00060523	yes	1
GRMZM2G480187	10:144057528-144061042	0.396057	1.12429	1.50524	1.48204	0.916878	0.00335	0.0209234	yes	1
GRMZM2G470527	1:151006119-151009393	0.760703	2.14136	1.49312	1.481	1.82217	5e-05	0.00060523	yes	1
GRMZM2G027851	7:171783842-171788818	10.6996	29.8783	1.48154	1.48068	2.35238	5e-05	0.00060523	yes	1
XLOC_052195	4:82047842-82048039	3.01223	8.39372	1.47848	1.47541	1.38942	0.00485	0.028019	yes	1
GRMZM2G019280	1:151087817-151088382	0.238246	0.679907	1.51289	1.47463	1.02779	0.00695	0.0369653	yes	1
GRMZM2G482741	4:34361869-34362629	0.67316	1.88677	1.4869	1.47325	1.41681	5e-05	0.00060523	yes	1
XLOC_032378	2:21151222-21151410	2.98376	8.30058	1.47608	1.47299	2.4453	0.0059	0.0325656	yes	1
GRMZM5G896905	3:76092096-76126029	1.4375	4.00746	1.47913	1.47272	1.09671	0.00065	0.00557143	yes	1
GRMZM2G091743	4:158706686-158709418	0.173385	0.498196	1.52274	1.47051	0.852864	0.00855	0.0434768	yes	1
GRMZM2G487123	7:169387085-169390752	3.81412	10.5765	1.47144	1.46903	1.00772	0.0007	0.00591267	yes	1
GRMZM5G860235	7:160121912-160123965	0.41828	1.17525	1.49043	1.46857	1.74214	5e-05	0.00060523	yes	1
GRMZM2G095314	10:37627082-37628188	0.282454	0.798306	1.49893	1.46669	1.17176	5e-05	0.00060523	yes	1
GRMZM5G840054	5:173572253-173572895	0.435832	1.21947	1.48441	1.46346	1.15097	0.00045	0.00410897	yes	1
GRMZM2G007896	10:98776932-98777222	1.48804	4.11417	1.46719	1.46103	1.71828	0.0011	0.00858278	yes	1
GRMZM2G378047	1:130337227-130337659	5.41659	14.9246	1.46224	1.46054	1.32179	5e-05	0.00060523	yes	1
GRMZM2G036740	4:189019552-189020052	0.747349	2.07119	1.47061	1.45838	1.03986	0.0015	0.0110162	yes	1
GRMZM5G863970	1:99190537-99191800	0.249748	0.702979	1.49301	1.45675	0.945189	0.0012	0.00921509	yes	1
GRMZM2G006206	10:19546423-19548798	0.195912	0.554635	1.50134	1.45529	1.14405	5e-05	0.00060523	yes	1
GRMZM2G044383	1:81787075-81788381	2.26302	6.22266	1.45928	1.45524	1.63818	5e-05	0.00060523	yes	1
GRMZM2G119663	10:19038365-19041022	0.175277	0.497762	1.50582	1.45447	0.918756	0.00215	0.0146447	yes	1
GRMZM2G138710	1:76162746-76164213	0.272409	0.763472	1.4868	1.45356	1.38838	5e-05	0.00060523	yes	1
GRMZM2G458195	10:113409086-113410606	0.16014	0.455815	1.50912	1.45303	1.1062	5e-05	0.00060523	yes	1
GRMZM2G320117	1:3738693-3742499	23.2276	63.409	1.44885	1.44845	1.76919	5e-05	0.00060523	yes	1
XLOC_081784	6:97964749-97964918	3.84201	10.4866	1.44861	1.44624	2.06123	0.0084	0.0429049	yes	1
GRMZM2G331466	1:279055737-279056528	0.771288	2.11859	1.45777	1.44597	1.33123	5e-05	0.00060523	yes	1
AC210595.3_FG004	9:43528360-43538696	18.3015	49.8459	1.44552	1.44501	1.15073	5e-05	0.00060523	yes	1
GRMZM2G133637	10:98882352-98883153	19.5145	53.146	1.44541	1.44495	2.1348	5e-05	0.00060523	yes	1
GRMZM2G146627	3:13536785-13539654	1.66174	4.5413	1.45041	1.44493	1.99303	5e-05	0.00060523	yes	1
GRMZM2G181419	7:72142831-72145653	0.266194	0.739643	1.47435	1.44052	1.1502	5e-05	0.00060523	yes	1
GRMZM2G527625	9:148740431-148740647	15.7264	42.6291	1.43865	1.43807	1.39082	5e-05	0.00060523	yes	1
GRMZM2G461598	10:98870272-98870695	4.2468	11.5182	1.43947	1.43733	1.58513	5e-05	0.00060523	yes	1
GRMZM2G141325	6:105509798-105511254	0.451923	1.23955	1.45566	1.43568	1.20137	5e-05	0.00060523	yes	1
GRMZM2G479135	2:41121574-41124572	2.28303	6.18178	1.43707	1.4331	1.12376	5e-05	0.00060523	yes	1
GRMZM2G082268	2:75546752-75565755	1.9904	5.37727	1.43382	1.42927	0.882342	0.0002	0.00208081	yes	1
GRMZM2G080442	8:41298970-41299788	0.166684	0.465382	1.4813	1.42792	1.05042	0.0025	0.0165053	yes	1
XLOC_059018	4:108611806-108611962	14.4181	38.8053	1.42837	1.42774	1.13751	5e-05	0.00060523	yes	1
GRMZM2G038198	10:39631023-39635630	0.528427	1.43819	1.44448	1.42743	1.54852	5e-05	0.00060523	yes	1
XLOC_071860	5:114392357-114392520	3.96848	10.6787	1.42808	1.4258	1.66015	0.00525	0.0297898	yes	1
GRMZM2G579291	10:71410535-71410653	1378.24	3699.72	1.42458	1.42458	2.33478	5e-05	0.00060523	yes	1
GRMZM2G096831	7:33926697-33928648	0.396482	1.08067	1.4466	1.42395	1.71874	5e-05	0.00060523	yes	1
GRMZM2G498550	8:80295737-80296502	1.9477	5.23825	1.42732	1.42268	1.71343	5e-05	0.00060523	yes	1
GRMZM2G171816	2:221325653-221326782	0.439003	1.19303	1.44233	1.42188	1.24605	0.00015	0.00161686	yes	1
GRMZM5G855743	7:22328449-22330186	0.221217	0.608801	1.46051	1.42023	1.062	0.00165	0.011869	yes	1
GRMZM2G459370	10:53148705-53151541	0.156481	0.434973	1.47494	1.41836	1.27298	5e-05	0.00060523	yes	1
GRMZM2G163132	3:92544042-92548588	0.162451	0.450744	1.4723	1.41778	0.864362	0.00265	0.0172989	yes	1
GRMZM2G309643	10:23242232-23242858	0.205439	0.565412	1.4606	1.41732	0.885295	0.00105	0.00826062	yes	1
GRMZM5G879742	2:86876028-86881956	0.510746	1.37672	1.43056	1.41302	1.03412	0.0043	0.0254543	yes	1
GRMZM2G127382	1:130754380-130755694	51.4221	136.756	1.41114	1.41097	2.01544	5e-05	0.00060523	yes	1
GRMZM5G803981	2:204826055-204829319	1.29279	3.4523	1.41706	1.41013	1.98559	5e-05	0.00060523	yes	1
GRMZM2G097981	4:3593192-3596494	1.54469	4.12171	1.41593	1.41011	1.88948	5e-05	0.00060523	yes	1
ClusterV2_52	4:161849103-161850146	0.743147	1.98437	1.41696	1.40493	1.64227	5e-05	0.00060523	yes	1
GRMZM2G326064	5:26092938-26096252	0.186062	0.509049	1.45202	1.40456	1.07774	5e-05	0.00060523	yes	1
GRMZM2G061695	3:219494800-219498659	0.763928	2.03419	1.41295	1.40126	1.76757	5e-05	0.00060523	yes	1
GRMZM2G032721	2:42397039-42402191	2.02333	5.35972	1.40542	1.401	1.17591	0.00015	0.00161686	yes	1
GRMZM2G024175	1:78064807-78065608	0.175689	0.479706	1.44913	1.39903	0.989338	0.00295	0.0188645	yes	1
GRMZM2G157102	2:32899872-32903463	0.451047	1.20491	1.41758	1.39786	1.7765	5e-05	0.00060523	yes	1
GRMZM2G474674	1:79360461-79378874	0.32126	0.862486	1.42476	1.39717	1.0416	5e-05	0.00060523	yes	1
GRMZM2G138829	10:39249720-39251581	0.224257	0.604824	1.43136	1.39208	1.0212	0.00265	0.0172989	yes	1
GRMZM5G801109	3:205441786-205442280	1.95144	5.13715	1.39643	1.39186	1.47838	5e-05	0.00060523	yes	1
GRMZM2G321750	1:153114580-153117656	0.265512	0.711926	1.42295	1.38974	1.17977	5e-05	0.00060523	yes	1
XLOC_058903	4:100435151-100435561	0.5572	1.47484	1.40429	1.38838	1.07125	0.00315	0.0198689	yes	1
GRMZM2G052778	3:196507950-196508909	0.263529	0.705084	1.41984	1.38642	0.840353	0.00855	0.0434768	yes	1
GRMZM5G893912	1:180635458-180637364	0.713031	1.87952	1.39833	1.38589	1.8118	5e-05	0.00060523	yes	1
GRMZM2G175874	2:204604212-204608080	0.270016	0.721228	1.41741	1.38481	1.48078	5e-05	0.00060523	yes	1
GRMZM2G057011	2:181270962-181272242	0.311319	0.829007	1.41299	1.38468	1.28252	0.0001	0.00113386	yes	1
GRMZM5G832375	1:45515511-45516271	0.208106	0.559439	1.42666	1.38451	0.993437	0.00055	0.00487218	yes	1
GRMZM2G003426	1:218852736-218853569	11.0617	28.8191	1.38146	1.38065	2.26595	5e-05	0.00060523	yes	1
GRMZM5G857552	2:221315241-221316153	0.356573	0.944411	1.40522	1.38051	1.12005	0.00015	0.00161686	yes	1
GRMZM2G096358	8:11486301-11488135	0.248369	0.661059	1.4123	1.37701	1.30911	5e-05	0.00060523	yes	1
GRMZM2G100709	6:93393017-93401220	0.300755	0.79667	1.40539	1.3762	1.29308	5e-05	0.00060523	yes	1
GRMZM2G394203	1:50085518-50086641	0.416308	1.09604	1.39658	1.37544	1.31645	5e-05	0.00060523	yes	1
GRMZM5G878018	10:15981483-15983181	0.200519	0.535297	1.4166	1.37309	0.943887	0.0013	0.00982964	yes	1
GRMZM2G383338	1:251163289-251164559	0.715655	1.86946	1.38529	1.37296	1.49061	5e-05	0.00060523	yes	1
XLOC_060210	4:161859064-161860320	0.553412	1.4465	1.38614	1.37024	1.52868	5e-05	0.00060523	yes	1
AC195884.3_FG002	1:7550176-7550638	0.579184	1.51278	1.38511	1.36992	0.929678	0.00155	0.0113023	yes	1
XLOC_052605	4:107856785-107857110	0.726727	1.89176	1.38025	1.36813	1.15442	0.00985	0.0486618	yes	1
GRMZM2G127336	10:57658110-57664789	1.74947	4.52445	1.37083	1.36579	1.8588	5e-05	0.00060523	yes	1
GRMZM2G050364	8:78644678-78646585	0.344233	0.901413	1.3888	1.36341	1.43276	5e-05	0.00060523	yes	1
GRMZM2G550688_X_1	6:61918095-61919105	0.615381	1.59689	1.37571	1.36146	1.1476	0.00395	0.0237955	yes	1
GRMZM2G430942	3:176644677-176645996	0.242002	0.637382	1.39714	1.36118	1.05162	0.0001	0.00113386	yes	1
GRMZM2G151596	10:63072690-63073683	0.572645	1.48661	1.37631	1.36101	1.23005	5e-05	0.00060523	yes	1
GRMZM2G089442	1:95439743-95440930	0.970906	2.50804	1.36916	1.36011	1.42934	5e-05	0.00060523	yes	1
GRMZM2G085974	1:231217302-231219165	0.834394	2.15338	1.3678	1.3573	1.66711	5e-05	0.00060523	yes	1
GRMZM2G436969	4:154843371-154844693	0.444906	1.15369	1.37469	1.35507	1.43729	5e-05	0.00060523	yes	1
GRMZM5G864847	6:130188996-130190406	0.339267	0.878874	1.37323	1.34765	1.15316	0.0005	0.00450104	yes	1
GRMZM2G024778	3:152896441-152897277	0.199305	0.522492	1.39043	1.34715	0.868462	0.0041	0.0245168	yes	1
GRMZM2G368807	10:39762042-39763188	1.81671	4.63704	1.35187	1.34706	0.899793	0.0006	0.00522113	yes	1
GRMZM2G498069	4:181843462-181843874	0.669443	1.71774	1.35948	1.34646	1.01545	0.00055	0.00487218	yes	1
GRMZM2G087512	7:105258707-105259935	0.230406	0.601054	1.38331	1.34583	0.824818	0.00925	0.0463394	yes	1
GRMZM2G054205	1:35573842-35576190	0.411676	1.06133	1.36628	1.3452	1.64502	5e-05	0.00060523	yes	1
GRMZM2G405548	10:90133147-90147511	18.9201	48.0783	1.34546	1.345	1.12343	0.00015	0.00161686	yes	1
XLOC_040321	3:92637770-92637968	1.93624	4.93278	1.34914	1.34463	1.1411	0.0067	0.0359702	yes	1
GRMZM2G523434	2:119819630-119820299	0.659589	1.68894	1.35648	1.34329	1.22145	5e-05	0.00060523	yes	1
AC186902.4_FG001	1:279942662-279943161	1.40966	3.59203	1.34945	1.34326	1.09943	5e-05	0.00060523	yes	1
GRMZM2G126096	1:153942571-153957570	0.544769	1.39668	1.35829	1.34234	1.68735	5e-05	0.00060523	yes	1
GRMZM2G075148	2:213843528-213851346	0.375239	0.96487	1.36253	1.33946	0.936999	0.0018	0.0126944	yes	1
GRMZM2G338441	10:5443470-5447730	0.477341	1.22313	1.35749	1.33932	1.43965	5e-05	0.00060523	yes	1
XLOC_062293	4:229619105-229619325	2.13822	5.42271	1.34261	1.33853	1.27554	0.0067	0.0358267	yes	1
GRMZM2G145461	6:83025838-83027065	0.284472	0.73386	1.36722	1.3369	0.738134	0.00695	0.0369653	yes	1
GRMZM2G065088	3:148836109-148837348	1.48249	3.75625	1.34127	1.33541	1.70609	5e-05	0.00060523	yes	1
GRMZM2G060596	3:113632440-113633389	0.179039	0.466672	1.38214	1.33431	0.937402	0.00055	0.00487218	yes	1
GRMZM2G076394	2:113945053-113948607	0.645351	1.64086	1.3463	1.33288	1.66998	5e-05	0.00060523	yes	1
GRMZM2G079303	3:230308558-230311393	0.166842	0.435326	1.38361	1.3324	1.27241	5e-05	0.00060523	yes	1
GRMZM2G157272	10:77482314-77485477	0.850976	2.15735	1.34207	1.33189	1.60396	5e-05	0.00060523	yes	1
GRMZM5G899577	10:144971728-144972120	0.833272	2.11164	1.34151	1.33111	1.08468	0.00035	0.00332877	yes	1
GRMZM5G898684	2:210248694-210274850	0.932986	2.35852	1.33796	1.32868	0.972529	0.00105	0.00826062	yes	1
GRMZM2G145909	10:50588818-50590827	1.98024	4.98653	1.33236	1.32798	1.99425	5e-05	0.00060523	yes	1
GRMZM2G018673	4:226250238-226251361	0.185125	0.479735	1.37374	1.3276	0.882263	0.0009	0.00729152	yes	1
GRMZM2G006328	3:199409567-199409822	2.06303	5.19263	1.3317	1.3275	1.19287	0.00185	0.0129764	yes	1
GRMZM2G443111	1:107169328-107170089	0.23037	0.593233	1.36465	1.32746	0.828019	0.00845	0.0430923	yes	1
GRMZM2G026930	3:216386030-216387865	0.264034	0.677466	1.35943	1.32693	0.67169	0.00605	0.0331862	yes	1
Cluster_184	4:22246505-22246910	1.14545	2.88737	1.33384	1.32629	1.16332	0.0005	0.00450104	yes	1
GRMZM2G062635	1:10040197-10041399	0.337849	0.860745	1.34921	1.32379	0.964711	0.0004	0.00371968	yes	1
GRMZM2G075595	5:19078179-19079565	0.290498	0.741848	1.3526	1.32309	1.2305	5e-05	0.00060523	yes	1
XLOC_055520	4:213548322-213586978	2.94338	7.36374	1.32297	1.32003	1.01481	0.0013	0.00982964	yes	1
GRMZM2G041544	3:140989508-140992150	0.666875	1.67549	1.3291	1.31621	1.57047	5e-05	0.00060523	yes	1
GRMZM2G443445	2:8784043-8786263	0.203783	0.522279	1.35779	1.31604	1.17173	0.0001	0.00113386	yes	1
GRMZM2G428040	9:151949361-151949977	1.96213	4.90012	1.3204	1.316	1.30992	0.00065	0.00557143	yes	1
GRMZM2G536410	2:191658366-191659228	0.893596	2.23724	1.32402	1.3144	1.39212	5e-05	0.00060523	yes	1
GRMZM5G816162	6:28801255-28803393	0.247112	0.629381	1.34877	1.31428	0.843699	0.0085	0.0432792	yes	1
GRMZM2G096713	8:146229488-146230779	1.71902	4.28809	1.31875	1.31374	1.19647	5e-05	0.00060523	yes	1
GRMZM2G057100	2:58050218-58050889	1.20378	3.00591	1.32023	1.31309	1.39569	5e-05	0.00060523	yes	1
GRMZM2G009725	6:14761103-14766660	1.56939	3.91094	1.31731	1.31183	1.28968	5e-05	0.00060523	yes	1
GRMZM2G058681	8:6243735-6257435	0.589628	1.47717	1.32496	1.31043	1.53263	5e-05	0.00060523	yes	1
XLOC_081348	6:83402585-83402902	0.666662	1.66668	1.32195	1.3091	0.818186	0.00755	0.0394601	yes	1
GRMZM2G330012	5:56967481-56968495	4.65471	11.5475	1.31082	1.30897	2.16476	5e-05	0.00060523	yes	1
AC233955.1_FG002	9:135562274-135564691	0.191618	0.489129	1.35198	1.30779	1.0531	0.0001	0.00113386	yes	1
GRMZM2G162007	4:172864337-172866690	2.21839	5.50416	1.31101	1.30714	1.10137	5e-05	0.00060523	yes	1
GRMZM2G051866	10:130415768-130426605	3.72876	9.23967	1.30915	1.30684	1.6728	5e-05	0.00060523	yes	1
GRMZM2G012754	1:63936173-63937248	0.210376	0.534974	1.3465	1.30622	1.0123	0.0004	0.00371968	yes	1
GRMZM2G173870	10:124322412-124324206	1.87773	4.65777	1.31065	1.30608	1.62192	5e-05	0.00060523	yes	1
GRMZM2G143215	1:130606198-130608641	2.26521	5.61425	1.30945	1.30566	1.83686	5e-05	0.00060523	yes	1
GRMZM2G459563	1:64085712-64088363	0.456063	1.14194	1.32418	1.30547	1.63832	5e-05	0.00060523	yes	1
GRMZM2G548616	7:142415668-142416233	1.91436	4.73007	1.305	1.30053	1.54901	5e-05	0.00060523	yes	1
Cluster_159	3:157505093-157505616	0.46019	1.14727	1.3179	1.29941	0.902964	0.0014	0.0104436	yes	1
GRMZM2G122488	1:19608777-19610535	0.475863	1.18501	1.31629	1.2984	0.94282	0.0007	0.00591267	yes	1
GRMZM2G018436	2:150664742-150666249	0.189319	0.479944	1.34205	1.29754	1.16181	5e-05	0.00060523	yes	1
GRMZM2G537730	1:93990664-93993201	84.3857	207.413	1.29744	1.29733	1.79605	5e-05	0.00060523	yes	1
GRMZM2G537903	4:161861721-161862208	0.721746	1.78811	1.30887	1.29707	1.05022	0.0002	0.00208081	yes	1
XLOC_003900	1:156332686-156332847	5.25584	12.9212	1.29775	1.29612	1.20214	0.01005	0.0494487	yes	1
GRMZM2G488825	1:130690673-130691362	0.555848	1.37778	1.30958	1.29429	1.10762	5e-05	0.00060523	yes	1
XLOC_095425	8:97661687-97662024	0.618484	1.5302	1.30691	1.29317	1.02935	0.0101	0.0496696	yes	1
GRMZM2G074358	6:82927596-82929052	0.554429	1.37296	1.30821	1.2929	1.40818	5e-05	0.00060523	yes	1
XLOC_000548	1:14383600-14383946	0.728807	1.79957	1.30404	1.29238	0.831681	0.007	0.0371651	yes	1
GRMZM2G017849	3:150474942-150475592	0.516283	1.27849	1.3082	1.29177	1.01796	0.00015	0.00161686	yes	1
GRMZM2G336918	4:232849405-232849950	0.412779	1.02438	1.31131	1.29079	0.929867	0.0014	0.0104436	yes	1
GRMZM5G804247	10:33272340-33284868	0.26148	0.654163	1.32295	1.29069	0.79788	5e-05	0.00060523	yes	1
GRMZM2G115306	1:131322147-131322831	239.329	585.386	1.2904	1.29036	1.55387	5e-05	0.00060523	yes	1
GRMZM2G087463	2:206889652-206890525	0.217329	0.544781	1.32579	1.28714	0.84848	0.00125	0.00950704	yes	1
GRMZM5G823162	9:15269258-15270789	0.305752	0.759456	1.3126	1.28505	1.44012	5e-05	0.00060523	yes	1
AC206223.3_FG005	9:137582694-137587319	0.20642	0.516652	1.32361	1.28302	1.35218	5e-05	0.00060523	yes	1
XLOC_050633	4:15217121-15217594	1.36351	3.33051	1.28842	1.2822	1.19239	5e-05	0.00060523	yes	1
GRMZM2G437097	3:20424987-20425404	0.511806	1.25894	1.29854	1.28204	1.08655	0.0081	0.0416792	yes	1
GRMZM2G422340	2:7427627-7430981	0.725735	1.77893	1.2935	1.28184	1.69284	5e-05	0.00060523	yes	1
GRMZM2G125745	4:168429050-168429647	0.512122	1.25938	1.29815	1.28167	0.987483	0.0005	0.00450104	yes	1
GRMZM2G459484	6:159858306-159860343	0.961177	2.35053	1.29011	1.2813	1.527	5e-05	0.00060523	yes	1
GRMZM2G055025	1:22626499-22632521	4.65875	11.3316	1.28234	1.28052	2.04043	5e-05	0.00060523	yes	1
XLOC_076294	6:69620444-69620746	0.642365	1.57472	1.29363	1.28048	0.949044	0.00515	0.0293595	yes	1
AC193591.3_FG001	4:227329605-227330112	1.33841	3.26365	1.28596	1.27964	1.29817	5e-05	0.00060523	yes	1
GRMZM2G321413	1:288272814-288278303	0.222914	0.555052	1.31613	1.27859	1.21024	5e-05	0.00060523	yes	1
XLOC_042334	3:181162245-181162379	14.9017	36.1314	1.27777	1.27721	2.11397	0.0064	0.0347434	yes	1
GRMZM2G455909	4:1553216-1556576	2.26391	5.49938	1.28045	1.27671	1.96643	5e-05	0.00060523	yes	1
GRMZM2G086532	10:135655846-135656098	35.8898	86.9622	1.27681	1.27658	1.77504	5e-05	0.00060523	yes	1
XLOC_026731	2:66528178-66529351	0.981453	2.38707	1.28225	1.27366	1.15161	0.00165	0.011869	yes	1
ClusterV2_42	4:74709299-74714595	0.296328	0.728295	1.29733	1.26912	1.72454	5e-05	0.00060523	yes	1
AC177889.2_FG006	1:26749456-26749891	0.733337	1.781	1.28014	1.26868	1.05339	0.00165	0.011869	yes	1
GRMZM2G519936	1:102748457-102748601	112.707	271.177	1.26666	1.26658	1.58509	5e-05	0.00060523	yes	1
GRMZM2G080672	3:153034359-153034913	1.10591	2.6741	1.27381	1.26622	1.27078	5e-05	0.00060523	yes	1
GRMZM2G455420	10:100035207-100037714	1.97766	4.76983	1.27014	1.26589	1.58441	5e-05	0.00060523	yes	1
GRMZM2G312585	5:43683869-43685009	0.243762	0.600195	1.29996	1.26579	1.07753	0.00015	0.00161686	yes	1
GRMZM2G340762	5:93876895-93915867	3.33613	8.03066	1.26735	1.26482	0.858615	0.0061	0.0334086	yes	1
GRMZM2G395279	2:62492125-62493877	0.256108	0.626144	1.28974	1.25734	0.961189	0.0009	0.00729152	yes	1
GRMZM2G056109	9:87002730-87064325	0.209606	0.514357	1.29509	1.25563	1.33365	5e-05	0.00060523	yes	1
XLOC_079958	6:14048321-14048710	1.25377	3.0056	1.26138	1.25471	1.13209	0.0003	0.00293434	yes	1
GRMZM2G520883	1:30346942-30347976	5.61347	13.4074	1.25606	1.25457	2.00574	5e-05	0.00060523	yes	1
GRMZM2G145313	9:140271043-140272640	1.62384	3.88785	1.25956	1.25441	1.95291	5e-05	0.00060523	yes	1
GRMZM2G069460	10:113002306-113003681	0.222609	0.544675	1.29088	1.25374	0.956805	0.00095	0.00761724	yes	1
GRMZM5G876395	6:14761103-14766660	1.93874	4.63164	1.2564	1.25209	0.685851	0.00785	0.0406348	yes	1
GRMZM5G821047	7:120797781-120799329	13.7044	32.6427	1.25212	1.25151	1.23811	0.0002	0.00208081	yes	1
GRMZM2G146222	4:188205272-188206844	0.233833	0.570351	1.28637	1.25103	0.931842	0.0006	0.00522113	yes	1
GRMZM5G831230	2:15890849-15891987	0.364014	0.878639	1.27128	1.24851	1.01723	0.0011	0.00858278	yes	1
GRMZM2G004036	1:285460485-285462103	1.45022	3.45328	1.25169	1.24595	1.44065	5e-05	0.00060523	yes	1
GRMZM2G000217	10:128611660-128612036	2.99554	7.1094	1.24691	1.24413	1.21916	5e-05	0.00060523	yes	1
GRMZM2G446052	1:118310746-118312055	0.191274	0.466331	1.28572	1.2428	0.884361	0.00115	0.00890855	yes	1
GRMZM2G382568	1:62144206-62146561	4.90785	11.6283	1.24448	1.24278	1.28287	5e-05	0.00060523	yes	1
GRMZM2G491328	1:82937773-82937901	73.8982	174.787	1.24199	1.24187	1.26858	5e-05	0.00060523	yes	1
GRMZM2G377695	4:74716600-74717287	0.9985	2.37476	1.24995	1.24163	1.02744	0.0001	0.00113386	yes	1
GRMZM2G054155	7:156311497-156314690	0.305517	0.735239	1.26696	1.23999	1.04592	5e-05	0.00060523	yes	1
GRMZM2G540710	10:120663795-120664381	0.856724	2.03379	1.24727	1.2376	0.968889	0.0001	0.00113386	yes	1
GRMZM2G086723	2:121363961-121364438	5.29553	12.493	1.23827	1.23671	1.29373	5e-05	0.00060523	yes	1
GRMZM2G163980	10:6847771-6848314	0.344824	0.825254	1.25898	1.23511	0.939436	0.0012	0.00921509	yes	1
GRMZM2G134563	4:116149772-116159571	0.210694	0.509394	1.27364	1.23478	1.06952	0.0006	0.00522113	yes	1
XLOC_041492	3:150473947-150474465	0.87196	2.06315	1.24252	1.23304	1.03973	5e-05	0.00060523	yes	1
GRMZM2G168724	6:160669787-160670479	0.237054	0.570615	1.2673	1.23276	0.813916	0.00265	0.0172989	yes	1
GRMZM2G098568	6:14710098-14712491	0.905512	2.14025	1.24098	1.23185	1.34332	0.00015	0.00161686	yes	1
GRMZM2G429057	8:26868806-26871810	0.483375	1.14755	1.24734	1.23032	1.48517	5e-05	0.00060523	yes	1
GRMZM2G357317	1:118477987-118483149	0.273033	0.653801	1.25977	1.22978	1.1863	5e-05	0.00060523	yes	1
GRMZM2G426719	1:130739424-130749924	1.97911	4.65249	1.23315	1.22898	1.89344	5e-05	0.00060523	yes	1
GRMZM2G172483	1:151012044-151013115	0.760751	1.79528	1.23871	1.22789	1.21836	5e-05	0.00060523	yes	1
GRMZM2G413972	1:131341412-131343664	42.0832	98.5163	1.22712	1.22692	1.84393	5e-05	0.00060523	yes	1
GRMZM2G337768	6:120633664-120635951	1.14711	2.69717	1.23344	1.22626	1.602	5e-05	0.00060523	yes	1
GRMZM2G010740	9:23069857-23072481	14.0149	32.8015	1.2268	1.22621	1.96172	5e-05	0.00060523	yes	1
Cluster_258	5:209267288-209268166	0.303	0.722168	1.25301	1.22601	0.961984	0.00155	0.0113023	yes	1
GRMZM2G512616	9:67412400-67413017	0.414106	0.980416	1.24339	1.22361	0.991369	0.0007	0.00591267	yes	1
GRMZM2G176605	1:259332167-259334153	0.370867	0.87865	1.24439	1.22233	1.42448	5e-05	0.00060523	yes	1
GRMZM2G559108_X_1	2:61729598-61730094	1.71002	4.00261	1.22693	1.22212	1.02929	0.0001	0.00113386	yes	1
GRMZM2G540737	1:84014383-84014529	42.0255	98.0099	1.22166	1.22147	1.24595	5e-05	0.00060523	yes	1
GRMZM2G370920	4:89127682-89129240	1.92734	4.50731	1.22565	1.22139	1.75253	5e-05	0.00060523	yes	1
XLOC_100825	8:116976813-116977565	1.656	3.86651	1.22333	1.21837	0.873853	0.00425	0.025239	yes	1
GRMZM2G564829	5:1244353-1244723	0.569702	1.33882	1.23268	1.21831	0.825044	0.00975	0.0482904	yes	1
GRMZM5G810393	9:15698007-15699723	2.87289	6.6935	1.22026	1.2174	1.94968	5e-05	0.00060523	yes	1
GRMZM2G401827	10:5220039-5221051	1.93431	4.50596	1.22001	1.21577	0.959856	0.001	0.00792822	yes	1
GRMZM2G358882	1:34370460-34375019	0.326029	0.769387	1.23871	1.21375	1.3314	5e-05	0.00060523	yes	1
GRMZM2G579072	10:98654356-98654735	36.0733	83.6523	1.21347	1.21325	1.40669	5e-05	0.00060523	yes	1
GRMZM2G383571	5:183553202-183554183	0.343605	0.809732	1.23669	1.21301	0.926713	0.0021	0.0143671	yes	1
GRMZM2G061403	8:158637117-158638675	0.551979	1.29191	1.22682	1.21204	1.30664	5e-05	0.00060523	yes	1
XLOC_054044	4:166768379-166768639	2.79521	6.48652	1.21449	1.21156	0.933219	0.00045	0.00410897	yes	1
GRMZM2G090774	3:218878330-218879256	0.241849	0.571915	1.24169	1.20825	0.924674	0.00035	0.00332877	yes	1
GRMZM2G397002	1:38314087-38314852	1.6351	3.79022	1.2129	1.20791	1.02157	0.0001	0.00113386	yes	1
GRMZM5G893670	10:114077492-114077868	2.8355	6.56217	1.21057	1.20769	1.06793	0.0001	0.00113386	yes	1
GRMZM2G176472	10:23812686-23816765	0.789253	1.83569	1.21776	1.20744	1.51905	5e-05	0.00060523	yes	1
GRMZM2G176035	2:180832835-180842702	0.415844	0.972552	1.22573	1.20621	1.34109	5e-05	0.00060523	yes	1
Cluster_358	9:70241385-70243791	0.454737	1.06191	1.22355	1.2057	1.49946	5e-05	0.00060523	yes	1
GRMZM2G509640	8:21708959-21709440	0.281362	0.6619	1.23419	1.20543	0.779062	0.0075	0.0392622	yes	1
GRMZM2G133695	10:111881205-111882784	0.207495	0.491542	1.24424	1.20539	0.776773	0.0022	0.0149147	yes	1
GRMZM2G177041	1:119685847-119686177	41.5929	95.9011	1.20521	1.20501	1.66135	5e-05	0.00060523	yes	1
GRMZM2G087728	2:167246338-167247849	0.662853	1.53959	1.21578	1.20352	1.43892	5e-05	0.00060523	yes	1
GRMZM5G834303	2:200735014-200736700	2.20335	5.08405	1.20628	1.20258	1.65545	5e-05	0.00060523	yes	1
GRMZM2G543664	2:218364890-218365436	0.370366	0.86498	1.22371	1.20186	0.89411	0.00185	0.0129764	yes	1
GRMZM2G529277_X_1	2:220748003-220748254	3.09645	7.1238	1.20203	1.1994	0.984746	0.00035	0.00332877	yes	1
XLOC_090160	7:63069062-63069248	6.06545	13.9338	1.19991	1.19856	0.963931	0.0079	0.0408555	yes	1
GRMZM2G100086	1:39680079-39682830	0.713431	1.64961	1.20928	1.19792	1.51432	5e-05	0.00060523	yes	1
GRMZM6G880411	scaffold_198:342-1480	0.54161	1.2554	1.21282	1.19787	0.894888	0.00115	0.00890855	yes	1
GRMZM2G478160	7:132140323-132141225	3.74051	8.58925	1.1993	1.19712	1.42698	5e-05	0.00060523	yes	1
AC210596.3_FG003	6:77628443-77642062	1.62853	3.73855	1.19891	1.19393	1.56051	5e-05	0.00060523	yes	1
GRMZM2G333183	10:80582444-80591250	0.776821	1.78999	1.20429	1.19388	1.56268	5e-05	0.00060523	yes	1
AC233863.1_FG001	9:98988776-98989136	0.83571	1.92436	1.2033	1.19362	0.838345	0.00285	0.0183639	yes	1
GRMZM5G854551	6:11214336-11215651	0.861421	1.98272	1.20269	1.1933	1.28496	5e-05	0.00060523	yes	1
GRMZM2G088951	6:156443611-156447700	2.16913	4.97245	1.19684	1.1931	1.77947	5e-05	0.00060523	yes	1
GRMZM2G488906	10:113670163-113670643	8.50115	19.446	1.19374	1.19279	1.66125	5e-05	0.00060523	yes	1
GRMZM2G052279	2:142659253-142668474	0.626403	1.4444	1.2053	1.19241	0.886763	0.00095	0.00761724	yes	1
GRMZM2G420059	2:28938472-28940284	0.599784	1.38329	1.20559	1.19213	1.27486	0.0001	0.00113386	yes	1
GRMZM2G143139	3:224568122-224575787	0.493011	1.13919	1.20832	1.19196	1.49023	5e-05	0.00060523	yes	1
GRMZM2G081182	10:9867919-9868511	0.411984	0.954062	1.2115	1.19194	0.943255	0.00085	0.00695162	yes	1
GRMZM2G014797	3:65662113-65662673	0.92948	2.13423	1.19922	1.19053	1.12482	5e-05	0.00060523	yes	1
GRMZM2G025458	1:87810851-87811766	0.437835	1.01196	1.2087	1.1903	0.896575	0.00405	0.0242775	yes	1
XLOC_003716	1:146496606-146496860	1.26216	2.89194	1.19614	1.18974	0.937306	0.0089	0.0448402	yes	1
GRMZM2G078540	9:10532403-10564160	1.22829	2.81183	1.19485	1.18828	0.682618	0.007	0.0371651	yes	1
AC194650.1_FG011	1:280572683-280572907	9.67973	22.0601	1.1884	1.18756	0.960003	0.00775	0.0402028	yes	1
GRMZM2G124712	10:136480935-136497180	0.327077	0.756942	1.21055	1.18604	1.16409	5e-05	0.00060523	yes	1
GRMZM2G121374	6:81785088-81785914	0.421753	0.971727	1.20415	1.18512	1.05776	0.0002	0.00208081	yes	1
GRMZM2G075517	10:114671271-114673896	169.117	384.036	1.18322	1.18317	1.78408	5e-05	0.00060523	yes	1
AC186603.6_FG003	1:168712313-168713762	0.561641	1.28767	1.19705	1.18274	1.23915	5e-05	0.00060523	yes	1
ClusterV2_34	4:161865122-161869303	0.660471	1.51191	1.1948	1.18264	1.69569	5e-05	0.00060523	yes	1
XLOC_069326	5:9830927-9831321	1.19529	2.72552	1.18917	1.18243	0.995375	0.00025	0.00252206	yes	1
GRMZM2G082068	1:60085042-60086693	0.192186	0.448437	1.2224	1.18104	0.851702	0.00155	0.0113023	yes	1
GRMZM5G896323	10:34371088-34371472	1.18104	2.69034	1.18772	1.18092	0.978195	0.00035	0.00332877	yes	1
GRMZM2G433446	1:239739032-239739754	0.959097	2.18523	1.18803	1.17966	0.957886	0.0027	0.0175721	yes	1
GRMZM2G015788	3:8336545-8351635	0.890664	2.02978	1.18837	1.17935	0.742162	0.00835	0.0426719	yes	1
GRMZM2G522206	7:137549342-137550106	0.194039	0.451272	1.21765	1.17677	0.844728	0.0084	0.0428711	yes	1
XLOC_003070	1:107070827-107071898	0.602305	1.37391	1.18973	1.17643	1.11273	5e-05	0.00060523	yes	1
GRMZM2G450233	6:125337843-125340176	13.2027	29.8431	1.17656	1.17596	1.90902	5e-05	0.00060523	yes	1
siRNA_Z27kG1_16959	8:67908513-67909013	0.374064	0.857763	1.1973	1.17595	0.866614	0.00435	0.0256721	yes	1
XLOC_082088	6:106629417-106629739	1.11133	2.51879	1.18044	1.17324	0.877195	0.00135	0.0101426	yes	1
GRMZM2G135098	1:74217472-74218469	1.07575	2.43829	1.18053	1.17308	0.811335	0.00315	0.0198689	yes	1
AC211513.3_FG003	1:80506026-80507328	1.38819	3.14115	1.17808	1.17232	1.06519	5e-05	0.00060523	yes	1
GRMZM2G050829	10:85869782-85871698	1.0585	2.39696	1.17918	1.17163	1.38075	5e-05	0.00060523	yes	1
GRMZM2G028779	8:163995496-163996363	0.193389	0.448089	1.21228	1.17139	0.969807	0.001	0.00792822	yes	1
GRMZM2G024469	9:11583371-11585755	3.0957	6.97597	1.17213	1.16954	1.62546	5e-05	0.00060523	yes	1
GRMZM2G311710	9:132472464-132473507	0.507124	1.15317	1.1852	1.16948	0.911432	0.00345	0.0214138	yes	1
GRMZM2G393002	4:11067546-11092372	3.71535	8.36449	1.17078	1.16863	0.966632	0.0003	0.00293434	yes	1
GRMZM2G030148	2:216076498-216078010	0.375588	0.855481	1.18759	1.16644	1.25223	5e-05	0.00060523	yes	1
GRMZM2G389582	5:63305823-63308265	0.70603	1.59643	1.17705	1.16577	1.20642	5e-05	0.00060523	yes	1
GRMZM2G320305	10:2693388-2697471	0.367431	0.836512	1.18691	1.16532	1.20695	5e-05	0.00060523	yes	1
GRMZM2G070628	1:130709137-130737356	2.27135	5.105	1.16836	1.16485	1.69883	5e-05	0.00060523	yes	1
GRMZM2G170883	1:19610737-19613698	0.945933	2.1323	1.1726	1.16418	1.3711	5e-05	0.00060523	yes	1
GRMZM2G120019	10:113476103-113479295	0.331961	0.755854	1.18709	1.16324	0.923562	0.0005	0.00450104	yes	1
GRMZM2G455403	10:100031399-100033677	21.6979	48.5834	1.16291	1.16254	1.27721	0.00035	0.00332877	yes	1
GRMZM2G084775	8:159714021-159716032	0.645414	1.45652	1.17423	1.16192	1.12104	0.00015	0.00161686	yes	1
GRMZM2G537276	10:69811281-69811851	0.825879	1.86001	1.17131	1.16168	1.09619	0.00035	0.00332877	yes	1
XLOC_086103	7:87133537-87134141	1.14775	2.57938	1.16822	1.16128	1.11483	5e-05	0.00060523	yes	1
GRMZM2G138920	10:147759016-147762518	0.57101	1.28907	1.17474	1.16084	1.12909	5e-05	0.00060523	yes	1
GRMZM2G101666	2:232587626-232595411	1.15656	2.5962	1.16655	1.15969	0.997786	0.00025	0.00252206	yes	1
GRMZM5G815665	7:23247533-23249181	0.296095	0.672693	1.18389	1.15726	1.24236	0.00025	0.00252206	yes	1
GRMZM2G471253	1:23553722-23555205	2.65829	5.93971	1.15989	1.1569	1.12915	5e-05	0.00060523	yes	1
GRMZM2G100675	1:11298551-11299266	0.265893	0.604787	1.18558	1.15598	0.885261	0.0015	0.0110162	yes	1
GRMZM2G037485	9:101747047-101748531	0.499999	1.1257	1.17082	1.15502	1.15493	5e-05	0.00060523	yes	1
GRMZM2G172330	2:220473026-220477039	5.00456	11.1557	1.15647	1.15488	1.88998	5e-05	0.00060523	yes	1
GRMZM2G044194	7:3025542-3026306	0.681838	1.52968	1.16573	1.15412	0.928039	0.0008	0.00661365	yes	1
GRMZM2G006119	7:169255862-169258189	0.222562	0.50744	1.18903	1.15378	1.00554	0.0009	0.00729152	yes	1
GRMZM2G382569	1:62144206-62146561	4.60229	10.2503	1.15524	1.15352	1.43301	5e-05	0.00060523	yes	1
GRMZM2G113662	10:75085424-75087485	0.227725	0.518645	1.18746	1.15301	0.983559	0.00025	0.00252206	yes	1
GRMZM2G159592	8:64222277-64223655	0.248416	0.564436	1.18405	1.15245	1.04533	0.00055	0.00487218	yes	1
GRMZM2G003186	3:14281138-14342908	0.349779	0.789715	1.17489	1.15237	1.17939	5e-05	0.00060523	yes	1
AC185427.5_FG004	5:139148818-139149298	0.249422	0.565276	1.18037	1.14895	0.694549	0.00945	0.0471348	yes	1
GRMZM2G115168	1:131332531-131334923	163.613	362.688	1.14844	1.14839	1.39452	5e-05	0.00060523	yes	1
GRMZM2G493164	7:113564393-113564735	15.6651	34.6793	1.14652	1.14602	1.57235	5e-05	0.00060523	yes	1
GRMZM2G098215	4:92817450-92819725	0.607478	1.35641	1.15889	1.14593	1.18996	5e-05	0.00060523	yes	1
GRMZM2G488460	6:112089776-112090542	0.364123	0.817374	1.16657	1.14503	0.930215	0.001	0.00792822	yes	1
GRMZM2G041442_O_1	6:14352238-14357188	0.858972	1.91106	1.15369	1.14452	0.963314	0.00055	0.00487218	yes	1
GRMZM2G445791	1:60222480-60229432	0.23735	0.53676	1.17726	1.14435	1.13795	0.0001	0.00113386	yes	1
AC210168.4_FG003	3:126528727-126530274	1.12828	2.50565	1.15106	1.14408	1.08556	0.00045	0.00410897	yes	1
GRMZM2G340444	6:138774419-138776148	0.988727	2.19556	1.15095	1.14298	1.17218	5e-05	0.00060523	yes	1
GRMZM2G471635	4:57373824-57374550	0.482641	1.07733	1.15844	1.14218	0.923286	0.0011	0.00858278	yes	1
GRMZM2G147818	9:124217732-124218122	0.454123	1.01429	1.15931	1.14205	0.938142	0.00665	0.0357363	yes	1
XLOC_098795	8:21713467-21714305	0.511892	1.14167	1.15723	1.1419	1.02607	5e-05	0.00060523	yes	1
GRMZM2G300463	4:155640659-155643293	1.01269	2.24116	1.14606	1.1383	1.15528	5e-05	0.00060523	yes	1
GRMZM2G123320	8:102777322-102778557	0.209243	0.472499	1.17513	1.138	0.915597	0.00115	0.00890855	yes	1
GRMZM2G088291	8:60079031-60082829	0.651304	1.44511	1.14977	1.13774	1.1272	5e-05	0.00060523	yes	1
GRMZM2G509747	10:114674167-114675545	120.609	265.088	1.13614	1.13607	1.80888	5e-05	0.00060523	yes	1
AC196193.3_FG003	10:119765560-119778716	6.23747	13.7168	1.13692	1.13565	1.70829	5e-05	0.00060523	yes	1
GRMZM5G816289	6:92329767-92331846	1.34525	2.96688	1.14108	1.13524	1.57374	5e-05	0.00060523	yes	1
GRMZM2G354532	1:67110819-67112854	0.281624	0.630472	1.16266	1.13503	0.962498	0.00035	0.00332877	yes	1
GRMZM5G892727	1:162282137-162287578	33.4528	73.4696	1.13502	1.13479	0.78332	0.00505	0.028938	yes	1
GRMZM2G064679	6:152625107-152629291	2.68701	5.90516	1.13598	1.13306	1.65513	5e-05	0.00060523	yes	1
GRMZM2G130662	10:19863443-19864183	0.927568	2.04374	1.13969	1.13126	1.16797	5e-05	0.00060523	yes	1
GRMZM2G127035	7:165341866-165342477	0.300039	0.669076	1.15702	1.13112	0.817644	0.00465	0.0270849	yes	1
GRMZM2G045927	5:208940241-208941382	0.22768	0.51014	1.16389	1.12988	0.975775	0.006	0.0328702	yes	1
GRMZM2G352898	9:153428396-153430339	0.463785	1.02662	1.14638	1.12958	1.16658	5e-05	0.00060523	yes	1
GRMZM2G089288	7:8907040-8915695	0.596859	1.31725	1.14207	1.12901	1.00158	5e-05	0.00060523	yes	1
GRMZM2G095126	1:228378443-228381659	1.91498	4.19832	1.13248	1.1284	1.61995	5e-05	0.00060523	yes	1
XLOC_046409	3:107423539-107423723	4.09954	8.97116	1.12983	1.12792	0.676976	0.00845	0.0430923	yes	1
GRMZM2G159228	1:127566068-127568450	0.184609	0.414666	1.16747	1.12575	0.732475	0.0066	0.035448	yes	1
AC196576.3_FG002	3:203241104-203243485	1.88411	4.11993	1.12873	1.1246	1.03692	0.00085	0.00695162	yes	1
GRMZM2G001905	10:148308248-148312070	2.32525	5.08146	1.12786	1.1245	1.59862	5e-05	0.00060523	yes	1
GRMZM2G046359_O_1	8:21710312-21713198	1.89123	4.12901	1.12647	1.12235	0.864324	0.0009	0.00729152	yes	1
GRMZM2G064254	4:89459275-89461752	0.41367	0.911482	1.13973	1.12102	0.891608	0.0005	0.00450104	yes	1
GRMZM2G586500	4:110353781-110354437	0.298096	0.659893	1.14645	1.12055	0.850233	0.00335	0.0209234	yes	1
GRMZM2G030844	9:9955598-9957589	0.304244	0.672463	1.14423	1.11887	0.895824	0.001	0.00792822	yes	1
GRMZM2G555358	3:125217890-125218092	2.84094	6.17994	1.12123	1.11849	0.874486	0.0095	0.0473174	yes	1
[truncated: 1,090 more rows]
